# Supplementary material for: SITVITBovis—a publicly available database and mapping tool to get an improved overview of animal and human cases caused by Mycobacterium bovis
Source: Database (Oxford). 2022 Jan 13;2022:baab081. doi: 10.1093/database/baab081 (PMC8962452; doi:10.1093/database/baab081)
Supplement: baab081_Supp [file baab081_supp.zip]

Archive with 6 entries (6 files):
- sitvitbovis_database.pdf
- Supplementary_File_1_SITVITBovis_Supplementary_data.pdf
- Supplementary_File_2_Spoligoforests_by_continent.pdf
- Supplementary_File_3_SB_distribution_by_continent.xls
- Supplementary_Table S2_All_Spoligotypes.xls
- Supplementary_Table_S3_WGS_SRA_Bovis_data_with_country.xls
