# Supplementary material for: SITVITBovis—a publicly available database and mapping tool to get an improved overview of animal and human cases caused by Mycobacterium bovis
Source: Database (Oxford). 2022 Jan 13;2022:baab081. doi: 10.1093/database/baab081 (PMC8962452; doi:10.1093/database/baab081)
Supplement: baab081_Supp [file baab081_supp.zip › Supplementary_File_3_SB_distribution_by_continent.xls]

## Sheet: Africa
Supplementary File 3 (SB distribution in Africa)
SB (Africa)	SIT	Spoligotype	Total
SB0944	1037	676773777677600	136
SB0121	481	676773677777600	99
SB1176	3453	602773761000200	59
SB0130	691	676573777777600	45
SB1161	2729	614363777777600	41
SB0136	1673	614373777777600	41
SB0133	661	602773777777600	35
SB1027	2813	676773776277600	33
SB1476	3747	676773777760200	32
SB0120	482	676773777777600	31
SB1025	3025	676773777617600	29
SB0961	3748	476773777777600	28
Orphan	Orphan	ND	26
SB0134	665	616773777777600	21
SB0140	683	664073777777600	21
SB0951	2842	676773777677200	18
SB0131	594	656573777777600	16
SB0952	2839	676701777677600	13
SB0303	659	602733777777600	9
SB1477	3749	402773777757600	9
SB0300	1603	666773777677600	8
SB0328	757	676573777677600	7
SB0265	684	666773677777600	7
SB0953	308	674001777677600	6
SB1099	3720	476773777677600	6
SB1421	3725	676773776237600	6
SB0425	3753	256433777402600	6
SB1470	3745	602762037777600	6
SB0163	690	676573777637600	6
SB1420	2841	676773776261600	5
SB1432	3736	246773777677600	5
SB0267	670	656573377777600	5
SB1388	3591	602773677777600	4
SB1439	3742	676763777677600	4
SB1427	2843	674373776277600	4
SB1444	3726	676743776277600	4
SB1026	2840	646773777677600	3
SB1435	3740	676773037613600	3
SB1430	3734	676763777674200	3
SB1428	3733	676343777677600	3
SB1424	3730	674002177677600	3
SB1405	3751	262773777776600	3
SB0850	1036	676773777637600	3
SB1445	3727	676343776277600	3
SB1438	3741	676773776037600	3
SB1440	3743	676743777677600	3
SB1103	3719	676773437637600	3
SB1407	3752	602773037777600	3
SB0888	987	614173777777600	2
SB1153	2727	414363777777600	2
SB0856	820	676763777777600	2
SB1437	3738	676773776274600	2
SB1433	3737	676773777657600	2
SB1426	3732	676773776677600	2
SB1098	3721	676773776277400	2
SB1101	3722	674773777637600	2
SB1467	3746	602763777777600	2
SB1942	3750	602773777774600	2
SB1410	3760	466773777677600	2
SB1029	2838	676773776276600	2
SB1436	3739	676773776077600	2
SB1434	3758	602773776277600	2
SB1431	3735	676773776617600	2
SB1429	3757	602773777677600	2
SB1425	3731	676773777647400	2
SB1423	3729	666743717677600	2
SB1422	3728	676573377677600	2
SB1102	3723	676773437777600	2
SB1104	3724	636773777677600	2
SB1464	3744	262763777776600	2
SB1164	3666	676573777763600	2
SB1448		616773402000000	1
SB0331	664	616773776377600	1
SB1450		616600002017600	1
SB0828	1047	676773777773600	1
SB1452	1595	674363677777600	1
SB1984		602700361000200	1
SB1489		602773777753600	1
SB1941		000773777773600	1
SB0869	1026	676773677774600	1
SB1154		614363777767600	1
SB1152		400000777777600	1
SB1159		614363777777200	1
SB1411		666772377677600	1
SB1412		666770777677600	1
SB1095	3547	476773677777600	1
SB1443		656343776677600	1
SB1442		676743776677600	1
SB1418		676773777673600	1
SB1453		676773777674600	1
SB1454		676773777637200	1
SB2190		256423777402600	1
SB1446		602573777777600	1
SB1471		602702037777600	1
SB1404		602743777777600	1
SB1406		262773777756600	1
SB0145	479	640013777777600	1
SB0559	1023	676773677757600	1
SB0164		476773677777400	1
SB1163		676733777776600	1
SB0678	1008	676563777777600	1
SB0304	660	602773607777600	1
SB1419		676773357657600	1
SB1447		616773776775600	1
SB0822	997	636773777777600	1
SB1449	3847	616763757577600	1
SB1488		602773774777600	1
SB0415	644	200003377207600	1
SB1155		610373777777600	1
SB1157		614373777737600	1
SB1160		614373777774600	1
SB1158		614363777761600	1
SB1156		614341777777600	1
SB0991	3759	616773775777600	1
SB0849	1003	656773777777600	1
SB1441		676763776677600	1
SB1100		656773777677600	1
SB0960	2873	676773777700200	1
SB1468		602363777777600	1
SB1469		602772037777600	1
SB1408		602743037776600	1
SB0268	668	656473737777600	1
SB1021	1601	676773677777400	1

## Sheet: Americas
Supplementary File 3 (SB distribution in Americas)
SB	SIT	Spoligotype	Total
SB0140	683	664073777777600	413
SB0121	481	676773677777600	154
SB0130	691	676573777777600	128
SB0295	698	676773677777200	117
SB0120	482	676773777777600	96
SB0145	479	640013777777600	71
Orphan	Orphan	ND	66
SB0673	409	264073777777600	50
SB0153	658	600000017777600	46
SB0131	594	656573777777600	27
SB0881	1021	676773674037600	24
SB0484	1670	064073777777600	23
SB0520	669	656573377777200	14
SB1033	1855	664073777773600	12
SB0980	2153	664033777777600	11
SB0269	672	664063777777600	11
SB1071	3858	656573377603600	10
SB0134	665	616773777777600	10
SB0822	997	636773777777600	10
SB1135	2130	674773677777200	10
SB1055	1667	616773777777200	9
SB0327	778	676573777077600	8
SB1136	1845	000173777777600	8
SB0856	820	676763777777600	8
SB0965	422	676773667777600	8
SB1049	1856	664072777777600	7
SB1137	1853	674773674377200	7
SB1044	1305	064063777777600	7
SB0265	684	666773677777600	7
SB0663	829	640003777777600	7
SB0268	668	656473737777600	6
SB0274	681	664073777776600	6
SB1051	1848	676740677777600	6
SB1040	1158	640013377777600	6
SB1031	1849	674573777777600	6
SB1045	1850	664073776177600	5
SB1139	1852	676773770003600	5
SB1093	2141	636773677777600	5
SB0978	1863	664073777577600	5
SB0678	1008	676563777777600	4
SB1058	1857	676573777177600	4
SB0986	1858	264071777777600	4
SB2130	1669	676763677776600	4
SB0119	695	676763677777600	4
SB1114	1299	440003777777600	4
SB1053	1819	476763677777200	4
SB1140	2129	676773677377200	4
SB1795	2702	676143777777600	4
SB1059	1820	676773277777200	4
SB0267	670	656573377777600	4
SB0987	1859	624073777700600	3
SB0273	682	664073777777200	3
SB0292	1846	640013776777600	3
SB0289	674	664071777777600	3
SB1138	2133	676001677777200	3
SB1050	1816	676773677603600	3
SB1622	1599	000003777377600	3
SB0288	685	674073777777600	3
SB1122	1666	664063777776600	3
SB1111	1307	064061777777600	3
SB1110	1309	064263777777600	3
SB0669	1306	264063777777600	3
SB0971	1625	664073777700600	3
SB0868	989	616733777777600	3
SB1060	1842	476763777777600	2
SB0142	679	664073777763600	2
SB1143	3854	276773675777600	2
SB1145	3573	602773674177600	2
SB0837	1022	676773677743600	2
SB0271	675	664073377777600	2
SB1116	1308	664063777700600	2
SB1254	1847	676773677377600	2
SB0272	678	664073777757600	2
SB1413	3853	264073775777600	2
SB0440	657	600000016177600	2
SB1141	2630	676773477777600	2
SB0807	2631	676773675777600	2
SB0848	1010	676733677777600	2
SB1052	1817	474563777777600	2
SB1039	1818	640013777763600	2
SB0418	647	200003777377600	2
SB1493	3855	044063777777600	2
SB1735	1310	464223777774600	2
SB1499	3857	664033777776600	2
SB0662	752	440013777777600	2
SB2020	957	676501777177600	2
SB1359	3589	676773674777600	1
SB1047		664073777774600	1
SB1056		654573777777600	1
SB0996	1851	464073777777600	1
SB1380	3648	676773676037600	1
SB0867	977	076773777777600	1
SB1785		664060767777600	1
SB1906		660033777777600	1
SB1777		600000017703600	1
SB1781		644073777677600	1
SB0141	667	644073777777600	1
SB0298	3521	664073677777600	1
SB0559	1023	676773677757600	1
SB1147		670773677777600	1
SB1149		676773677177600	1
SB1148		676773774377600	1
SB1054		676573777743600	1
SB1043		664073017777600	1
SB1042		664000777777600	1
SB0337	1682	662773677777600	1
SB1806		676773674037200	1
SB1790		664073777776200	1
SB1775		416773777777200	1
SB0828	1047	676773777773600	1
SB1648	3711	676763777773600	1
SB1186		664073777775600	1
SB1809		664073777643600	1
SB1072		664073776777600	1
SB1715		266063777777600	1
SB1697		004061427777600	1
SB1700		024041767542600	1
SB1738		640203777777600	1
SB1719		436761637777600	1
SB1740		664273777776600	1
SB1721		440003777677600	1
SB1706		064063407777600	1
SB1720		440003767777600	1
SB1704		044263777746600	1
SB1702		024061777777600	1
SB1714		076763677777600	1
SB1711		064263777746600	1
SB1705		064061767776600	1
SB1057		676473737777600	1
SB1165		640033777777600	1
SB1501		464063777700600	1
SB1212		640023777775600	1
SB1213		640033377777600	1
SB1500		644063777700600	1
SB0671	3856	664063777757600	1
SB1214		676563777776600	1
SB1019	3514	636573777777600	1
SB0989	1118	676673757777600	1
SB0852	797	676773777777200	1
SB0944	1037	676773777677600	1
SB0953	308	674001777677600	1
SB1185	2131	676573477777600	1
SB1813		266073777777600	1
SB1142	3511	676773657777600	1
SB0946	1854	676773770000600	1
SB1038		664000177777600	1
SB1061		676573777577600	1
SB1062	3707	676573777775600	1
SB1797		676353677777600	1
SB1798		676400377777600	1
SB0486	2430	664013777777600	1
SB1782		656573237777200	1
SB1774		042773777777600	1
SB1144		676773677600600	1
SB1869	3584	076773677777200	1
SB1150		676343676037600	1
SB1063		676771757777600	1
SB1041		642501777177600	1
SB2097	3423	676373777776600	1
SB1595	3710	676773577777600	1
SB1546	1989	656773377777600	1
SB1046		664061777777600	1
SB1789		664073777377600	1
SB2550		674753677777600	1
SB0426	663	616773677777600	1
SB1247		664073477777600	1
SB0920	3529	672773777777600	1
SB0054	1303	624073777777600	1
SB1699		016703677746600	1
SB1733		464063777567600	1
SB1743		674763777077600	1
SB1710		064263777046600	1
SB1709		064063777767600	1
SB1707		064063767777600	1
SB1739		644043777777600	1
SB1717		424061777777600	1
SB1718		434161777077600	1
SB1701		024061637777600	1
SB1048		656473777743600	1
SB1064	3663	676773277777600	1
SB1495		640012017777600	1
SB1496		640023777777600	1
SB1497		640033777776600	1
SB1498		644063777777600	1
SB0415	644	200003377207600	1
SB0485		416773677563600	1
SB1759		640013776377600	1
SB2220	595	676777777777600	1
SB1502		664073617700600	1

## Sheet: Asia
Supplementary File 3 (SB distribution in Asia)
SB	SIT	Spoligotype	Total
SB0120	482	676773777777600	179
SB0140	683	664073777777600	85
SB0130	691	676573777777600	32
SB1167	1181	676773757777600	18
SB1040	1158	640013377777600	13
Orphan	Orphan	ND	9
SB1168	3861	676761757777600	8
SB0131	594	656573777777600	7
SB1031	1849	674573777777600	3
SB0145	479	640013777777600	2
SB1030	3860	664073776377600	2
SB2220	595	676777777777600	2
SB0288	685	674073777777600	2
SB0273	682	664073777777200	2
SB0144	673	664070377777600	2
SB0487	3859	664031777777600	2
SB0265	684	666773677777600	2
SB0465		664073776333600	1
SB0271	675	664073377777600	1
SB1033	1855	664073777773600	1
SB1049	1856	664072777777600	1
SB1067		664073777437600	1
SB1772		676341757777600	1
SB0934	3754	676773777776600	1
SB0347		424043636746600	1
SB0346		464043677777600	1
SB0269	672	664063777777600	1
SB1551	3846	676073777777600	1
SB0266	666	640013777177600	1
SB0141	667	644073777777600	1
SB0272	678	664073777757600	1
SB1032		664073777073600	1
SB1034		664073776373600	1
SB1066		664073757777600	1
SB1068		664073777637600	1
SB2182		476773777377200	1
SB0822	997	636773777777600	1
SB0345	651	464063777777600	1
SB0344		664073767777600	1
SB1504		676573777776200	1
SB0961	3748	476773777777600	1

## Sheet: Australasia
Supplementary File 3 (SB distribution in Australasia)
SB	SIT	Spoligotype	Total
SB0140	683	664073777777600	42
SB0130	691	676573777777600	31
SB1031	1849	674573777777600	3
SB1030	3860	664073776377600	2
SB0120	482	676773777777600	2
SB0273	682	664073777777200	2
SB0144	673	664070377777600	2
SB0487	3859	664031777777600	2
SB0145	479	640013777777600	1
SB0465		664073776333600	1
SB0271	675	664073377777600	1
SB1033	1855	664073777773600	1
SB1049	1856	664072777777600	1
SB1067		664073777437600	1
SB0345	651	464063777777600	1
SB0344		664073767777600	1
SB0288	685	674073777777600	1
SB0141	667	644073777777600	1
SB0272	678	664073777757600	1
SB1032		664073777073600	1
SB1034		664073776373600	1
SB1066		664073757777600	1
SB1068		664073777637600	1
SB0347		424043636746600	1
SB0346		464043677777600	1
SB0269	672	664063777777600	1
SB1504		676573777776200	1

## Sheet: Europe
Supplementary File 3 (SB distribution in Europe)
SB	SIT	Spoligotype	Total
SB0121	481	676773677777600	5083
SB0134	665	616773777777600	2021
SB0140	683	664073777777600	1696
SB0339	696	676773674177600	1371
SB0120	482	676773777777600	1348
SB0265	684	666773677777600	944
SB0295	698	676773677777200	832
SB0157	645	200003717207600	744
SB0130	691	676573777777600	583
SB0142	679	664073777763600	429
SB0152	980	400000077777600	356
SB0119	695	676763677777600	290
SB0416	646	200003777207600	290
SB1084	3714	200003367207600	251
SB0263	676	664073774037600	183
SB0418	647	200003777377600	161
SB1232	3507	636733777777600	154
SB1265	3508	616763777777600	137
SB1305	3509	436773676777600	135
SB0867	977	076773777777600	129
SB1190	3510	476773677777200	119
SB1142	3511	676773657777600	116
SB0886	1018	676773377757600	109
SB0135	3512	606773677777600	107
SB0294	692	676673677777600	103
SB0818	1044	676773777767600	103
SB0882	1005	672773777775600	93
SB0329	1028	676773677777000	93
	1810	200001377376600	85
SB1016	3513	664073777747600	84
SB0415	644	200003377207600	83
SB0875	982	416773777777600	83
SB1019	3514	636573777777600	76
SB0828	1047	676773777773600	74
SB1337	3515	676773677077600	73
SB1258	3516	676773664177600	70
SB0273	682	664073777777200	65
SB1193	3517	676673674177600	63
SB0832	1002	646773777767600	61
SB1021	1601	676773677777400	57
SB0856	820	676763777777600	57
SB1325	3518	676772277777600	55
SB0145	479	640013777777600	52
SB0841	1004	662773777777600	52
SB1299	3519	616773777077600	49
SB1174	3520	636733777774600	49
SB0426	663	616773677777600	48
SB0298	3521	664073677777600	45
SB1970	3522	676400657777600	45
SB1192	3523	676773617743600	44
SB1255	3524	676772037777600	44
SB1218	3525	676772077777600	42
SB0559	1023	676773677757600	42
SB1969	3526	676433777777400	42
SB0920	3529	672773777777600	42
SB1312	3528	676573777737600	39
SB0833	1040	676773777737600	38
SB0122	3532	276773677777600	38
SB1770	3527	076773776077600	38
SB1091	3530	676733677777200	36
SB0866	818	200003770000000	36
SB1336	3531	676643677777600	36
SB1257	3533	676573677777600	35
SB1191	3534	676613677777600	33
SB0275	677	664073777740600	33
SB0822	997	636773777777600	32
SB0128	662	614073777777600	31
SB0129	688	676473777777600	30
SB0819	970	000001707777600	30
SB1167	1181	676773757777600	30
SB0132	697	676773676177600	30
SB0341	650	436773677774600	29
SB1230	3536	674033677777200	29
SB0089	991	616773737777600	29
SB1188	3535	676761677777600	29
SB0820	1030	676773737777600	28
SB1361	3537	672773677777600	27
SB1308	3541	676773677773600	26
SB0999	3538	676763675777600	26
SB1275	3539	676773677677600	25
SB1306	3540	676740000037600	25
SB1401	3542	676770000000000	25
SB0133	661	602773777777600	23
SB1358	3543	436763676777600	23
SB0881	1021	676773674037600	22
SB0821	999	646770077767600	22
SB1632	3545	616773677777200	22
SB1095	3547	476773677777600	22
SB1623	3552	400773777777600	22
SB0824	990	616772777777600	21
SB0124	3556	436773677777600	21
SB0131	594	656573777777600	21
SB0141	667	644073777777600	20
SB1017	3546	076773677777600	20
SB1345	3551	676713677777600	20
SB0933	3562	602773777777400	20
SB0823	1000	646773776167600	19
SB1346	3548	676773677767600	19
SB0849	1003	656773777777600	19
SB0296	3549	676773677577600	19
SB0825	975	046773777767600	18
SB1254	1847	676773677377600	18
SB1357	3554	676573077777600	18
SB1263	3550	676573604377600	18
SB0827	974	046773777764600	17
SB1077	3715	200003774207600	17
SB0837	1022	676773677743600	17
SB1018	3553	666763677777600	17
SB1585	3555	614773777777600	17
SB0340	3557	006773677777600	17
SB1387	3559	400000077776600	17
SB0963	3558	676741377757600	16
SB1638	3561	676762077777600	15
SB1259	3563	676033677777600	15
SB0855	995	616773777775600	15
SB0272	678	664073777757600	15
SB1313	3567	676773677757200	15
SB1296	3560	636773676377600	15
SB1303	3564	676553777777600	15
SB1145	3573	602773674177600	15
SB1658	3565	616773777001600	14
SB1322	3568	616773774037600	14
SB0146	689	676573777017600	14
SB1537	3845	600023777777600	14
SB0269	672	664063777777600	13
SB0848	1010	676733677777600	13
SB0826	1016	676772777767600	13
SB1081	3716	200003710000000	13
SB1301	3566	266773674017600	13
SB1347	3569	676743754777600	13
SB1398	3572	616773777774600	13
SB1316	3575	676763674177600	12
SB1141	2630	676773477777600	12
SB1302	3571	666773677776600	12
SB0948	2370	276773777777600	12
SB0267	670	656573377777600	12
SB0831	1041	676773777743600	12
SB0288	685	674073777777600	12
SB1204	3570	676763777767600	12
SB1385	3576	676573777477600	12
SB1315	3574	616763777077600	11
SB0896	3577	666773657777600	11
SB0830	969	000001707777000	10
SB0835	978	200003777357600	10
SB1651	3579	676773676777200	10
SB1189	3581	400000077477600	10
SB1388	3591	602773677777600	10
SB0829	1048	676773777775600	10
SB0853	972	000001747777600	10
SB1624	3578	676753677777600	10
SB1672	3580	676773677776000	10
SB0337	1682	662773677777600	10
SB1656	3583	400000077777400	9
SB1384	3582	676773037777600	9
SB1869	3584	076773677777200	9
SB0678	1008	676563777777600	9
SB0840	1013	676760006067600	8
SB1264	3585	476763677777600	8
SB1375	3587	446773777767600	8
SB0274	681	664073777776600	8
SB0271	675	664073377777600	8
SB0839	1042	676773777753600	8
SB0303	659	602733777777600	8
SB2357	1440	676777677777600	8
SB1372	3586	676773677741600	8
SB1093	2141	636773677777600	8
SB0858	1025	676773677763600	8
SB0836	1020	676773417777600	7
SB0268	668	656473737777600	7
SB0266	666	640013777177600	7
SB0950	1932	676733777777600	7
SB0885	986	606773777777600	7
SB0916	3593	612773777777600	7
SB0969	3588	436773437777600	7
SB1359	3589	676773674777600	7
SB1286	3594	676573677477600	7
SB1635	3598	676473377757600	7
SB0125	3478	676773677747600	7
SB1394	3630	602773777775400	7
SB0040	1045	676773777770600	7
SB0870	1019	676773377777600	7
SB1364	3590	676763676377600	7
SB1646	3592	676473677777600	7
SB1629	3597	676573777771600	7
SB0843	1043	676773777766600	6
SB0668	1861	664073777707600	6
SB0807	2631	676773675777600	6
SB0864	993	616773777757600	6
SB1989	3620	466773677777600	6
SB1893	1730	676773777747600	6
SB1373	3596	646772077777600	6
SB1652	3600	606573777777600	6
SB1565	3170	676773776777600	6
SB1671	3617	676573777777000	6
SB2174	1109	200003400037600	6
SB0844	1033	676773777075600	6
SB1327	3595	616773774377600	6
SB1649	3599	676773617743400	6
SB1899	3601	676561777777600	6
SB0845	1015	676770077777600	5
SB0846	981	416773777777000	5
SB0673	409	264073777777600	5
SB1323	3606	676761377757600	5
SB1340	3608	676733674177600	5
SB1350	3610	672773674177600	5
SB1368	3612	672763777775600	5
SB1637	3614	676673677777200	5
SB1668	3616	676673474177600	5
SB1897	3618	676573377777600	5
SB1284	3623	676573677774000	5
SB1369	3627	676773677703600	5
SB0869	1026	676773677774600	5
SB1172	3667	674353677777600	5
SB1370	1439	674373677777600	5
SB0967	3602	676773677776600	5
SB1269	3604	676343677777600	5
SB0842	1046	676773777771600	5
SB0847	976	076773777777400	5
SB0666	1860	664073777741600	5
SB0975	1862	640000037777600	5
SB0139	680	664073777767600	5
SB1338	3607	676373677777600	5
SB1341	3609	646773777740200	5
SB1367	3611	636773674177600	5
SB1377	3613	616753777777600	5
SB1639	3615	616773777777400	5
SB1963	3619	676773677771200	5
SB0927	3621	676773777377600	5
SB1374	3628	664033777747600	5
SB0868	989	616733777777600	5
SB1090	3637	676773637777600	5
SB1661	819	676763677777400	5
SB0982	3603	676573417777600	5
SB1298	3605	666773677776200	5
SB0897	1185	676673777777600	4
SB0851	1001	646773777767200	4
SB0878	1032	676773776003600	4
SB0978	1863	664073777577600	4
SB1343	3625	674773677767600	4
SB1378	3629	674773377757600	4
SB1608	3631	676763677777200	4
SB1971	3633	476573677777200	4
SB1994	3635	666773277777600	4
SB0943	3636	676573777757600	4
SB1253	3638	676673676177600	4
SB1348	3642	664073777777400	4
SB1353	3644	660000007777600	4
SB0860	1039	676773777736600	4
SB0127	694	676743777777600	4
SB0854	1014	676763637767600	4
SB0850	1036	676773777637600	4
SB0290	671	664043777777600	4
SB0304	660	602773607777600	4
SB0153	658	600000017777600	4
SB1282	3622	676763677777000	4
SB1290	3624	676773277757600	4
SB1352	3626	676773617747600	4
SB1683	3632	676773607777600	4
SB1972	3634	676773637777200	4
SB1371	3645	670173677773600	4
SB0884	988	616601777777600	4
SB0862	985	606773677747600	4
SB0944	1037	676773777677600	4
SB1908	1108	200003370000000	4
SB0852	797	676773777777200	3
SB0863	1017	676773017737600	3
SB0865	1029	676773737766600	3
SB0914	3452	676173777777600	3
SB0861	971	000001747777000	3
SB1176	3453	602773761000200	3
SB0144	673	664070377777600	3
SB0872	3844	600003777777600	3
SB1310	3640	600000077777600	3
SB1376	3646	616773777773600	3
SB1380	3648	676773676037600	3
SB1626	3650	676763377757600	3
SB1662	3652	644063777747600	3
SB1682	3654	674013674037600	3
SB1873	3656	676700017777600	3
SB1892	3658	000000777777600	3
SB1967	3660	676773670017200	3
SB1075	3665	616473777777600	3
SB0890	994	616773777763600	3
SB2002	3717	200003357207600	3
SB1898	1598	262773777772600	3
SB1452	1595	674363677777600	3
SB1681	3713	676773677737600	3
SB1912	1600	200003770003600	3
SB1917	1605	416773677777600	3
SB0857	1034	676773777600600	3
SB0299	1011	676743377777600	3
SB0859	983	600373777777600	3
SB0934	3754	676773777776600	3
SB1278	3639	672773677775600	3
SB1332	3641	676363674177600	3
SB1349	3643	676600000000000	3
SB1379	3647	476773677777000	3
SB1395	3649	676661677777600	3
SB1627	3651	676773677775200	3
SB1665	3653	676772274177600	3
SB1685	3655	456773677777600	3
SB1874	3657	616773777177600	3
SB1966	3659	636773677777200	3
SB1996	3661	600373674177600	3
SB1164	3666	676573777763600	3
SB1320	3678	666573677777600	3
SB1630	3688	676573400000000	3
SB0054	1303	624073777777600	3
SB2393	979	200003777777600	3
SB1913	1636	200003774075600	3
SB0300	1603	666773777677600	3
SB0874	968	000001705777600	2
SB0877	1012	676760000007600	2
SB0873	1007	674373777777600	2
SB0892	1031	676773764146600	2
SB0123	1027	676773677775600	2
SB0894	1024	676773677761600	2
SB0328	757	676573777677600	2
SB0667	1297	664073077777600	2
SB0664	1304	640013737777600	2
SB0331	664	616773776377600	2
SB0327	778	676573777077600	2
SB0343	686	674153777777600	2
SB0966	3662	476773677776600	2
SB1064	3663	676773277777600	2
SB1234	3669	616773777703600	2
SB1283	3671	676563677774000	2
SB1295	3673	676773666617600	2
SB1307	3675	676773774177600	2
SB1319	3677	276573777777600	2
SB1333	3679	676363677777600	2
SB1363	3681	676673677677600	2
SB1386	3683	616773774017600	2
SB1392	3685	670373677777200	2
SB1625	3687	000073777777600	2
SB1640	3689	646762077777600	2
SB1657	3691	616773377717600	2
SB1675	3693	674173777773600	2
SB1677	3695	676773677437600	2
SB1687	3697	676753674177600	2
SB1871	3699	676401677777600	2
SB1962	3701	676773657577600	2
SB1981	3703	676773657777200	2
SB1995	3705	676672677777600	2
SB1287	2433	676563677477600	2
SB1309	2432	646773777700600	2
SB1909	1604	200003377377600	2
SB0989	1118	676673757777600	2
SB2021	1784	676760777777600	2
SB0560	3755	676773777777000	2
SB1931	3848	676773777402600	2
SB1929	3850	676773377736600	2
SB1926	3851	674173777777600	2
SB1648	3711	676763777773600	2
SB2220	595	676777777777600	2
SB0893	992	616773777677600	2
SB2213	996	636373677777600	2
SB0880	1006	674373777774000	2
SB0888	987	614173777777600	2
SB0891	998	644773777767600	2
SB0946	1854	676773770000600	2
SB0879	1035	676773777627600	2
SB0895	1009	676713677767600	2
SB1003	3477	672773777377600	2
SB0980	2153	664033777777600	2
SB1551	3846	676073777777600	2
SB0417	648	200103717207600	2
SB0301	687	674573777767600	2
SB0332	693	676743677777600	2
SB1031	1849	674573777777600	2
SB1074	3664	616343777777600	2
SB1177	3668	676773674377600	2
SB1281	3670	646763777767600	2
SB1293	3672	676773666177600	2
SB1300	3674	676633677777600	2
SB1314	3676	636773777774600	2
SB1344	3680	676773000037600	2
SB1366	3682	644073777747600	2
SB1391	3684	600363777377600	2
SB1399	3686	616763777774600	2
SB1650	3690	002773677777200	2
SB1669	3692	676773377740600	2
SB1676	3694	666733677777600	2
SB1678	3696	616740004377600	2
SB1689	3698	600033674177600	2
SB1890	3700	674773677775600	2
SB1979	3702	276773677777200	2
SB1985	3704	676763655777600	2
SB1998	3706	676433677777600	2
SB1277	3756	602433777777400	2
SB1294	2434	000033777777600	2
SB1381	3709	676771677777600	2
SB1199	3718	200003077377600	2
SB0883	973	016773777777600	2
SB1568	1637	676773777577600	2
SB1914	1635	200003777363600	2
SB1667	3712	666773477777600	2
SB1916	1596	200003777377200	2
SB1035	3852	664073777743600	2
SB1923	3849	476773777617600	2
SB1925	1602	674023777777600	2
SB0917		664073377077600	1
SB0942		676741777777600	1
SB0947		614073776037600	1
SB0938		676773000017600	1
SB0945		616771777777600	1
SB0936		464040777777600	1
SB0908		606773777775600	1
SB0909		000001745777600	1
SB0903		614073607777600	1
SB0925		476773777743600	1
SB0905		676033677777200	1
SB0919		676600377777600	1
SB0887		662763777417600	1
SB0937		676760077775600	1
SB0906		406773777773600	1
SB0929		614772777777600	1
SB0922		600073777777600	1
SB1519		000773777777600	1
SB1938		614173776003200	1
SB0953	308	674001777677600	1
SB1166		676773777437600	1
SB1202		676733776003600	1
SB0306		464063777577600	1
SB0996	1851	464073777777600	1
SB0660		664073777400600	1
SB0662	752	440013777777600	1
SB0665		664063077777600	1
SB0345	651	464063777777600	1
SB0671	3856	664063777757600	1
SB0674		474063777777600	1
SB0957		664033774037600	1
SB1181		664073777623600	1
SB0307		664041777777600	1
SB0143		664053777775600	1
SB0977		664043774037600	1
SB0974		664000377777600	1
SB0981		664073777600200	1
SB0291		464063777774600	1
SB0313		464043676742200	1
SB0486	2430	664013777777600	1
SB1146		664073777771600	1
SB1526		640013777776600	1
SB1528		676473776003600	1
SB0923		676603777777600	1
SB1207		662763777777600	1
SB1208		666763777777600	1
SB1209		674763777777600	1
SB1571		676773777776200	1
SB1584		602773777773200	1
SB1539		614023777777600	1
SB1542		616173777777600	1
SB1545		200000017377600	1
SB1552		676633777777000	1
SB0302		654573777767600	1
SB0466		670041777767600	1
SB0138		674573777743600	1
SB0136	1673	614373777777600	1
SB0445		430001077777600	1
SB0540		676771777774600	1
SB0431		600000070000000	1
SB0338		676743676177600	1
SB1449	3847	616763757577600	1
SB0163	690	676573777637600	1
SB1169		676771777777600	1
SB0484	1670	064073777777600	1
SB0968		672773777771600	1
SB0972		676741002037600	1
SB1051	1848	676740677777600	1
SB1059	1820	676773277777200	1
SB1195		656773677777600	1
SB1233		636733777757600	1
SB1260		676723777777600	1
SB1274		636723777777600	1
SB1280		474773674177600	1
SB1289		676773677776200	1
SB1292		636573677777600	1
SB1297		634553777777600	1
SB1321		676773774077600	1
SB1326		676663677777600	1
SB1329		676773674177400	1
SB1331		436773677477600	1
SB1339		676700677777600	1
SB1351		674003674037600	1
SB1365		076753777777600	1
SB1382		476573777777600	1
SB1389		676573777740600	1
SB1393		656773674177600	1
SB1397		676763677757600	1
SB1569		676773777477600	1
SB1628		676743377757600	1
SB1634		676413677777200	1
SB1641		664063777747600	1
SB1643		436773674777600	1
SB1645		666673677777600	1
SB1653		666073677777600	1
SB1655		616773776037600	1
SB1660		674773777777400	1
SB1664		642773677777200	1
SB1670		676741077757600	1
SB1674		656773777767600	1
SB1680		434763676777600	1
SB1686		476773674177600	1
SB1769		676773677407200	1
SB1875		676773406177600	1
SB1891		676413777777600	1
SB1895		676741674177600	1
SB1961		676763675777200	1
SB1965		676773657637600	1
SB1973		676773657747200	1
SB1976		676773677677200	1
SB1978		676613657777600	1
SB1986		436773677174600	1
SB1988		676773677577200	1
SB1991		676612677777600	1
SB1997		676373674177600	1
SB2001		674000674177600	1
SB2004		676773657774600	1
SB1078		200003617207600	1
SB1618		200003717204600	1
SB1872		000000717207600	1
SB1902		200003777361600	1
SB0926		616772776377600	1
SB0904		276573737777600	1
SB2271		642773677777600	1
SB1910		200003637343600	1
SB1922		476773777177600	1
SB1911		200003717207400	1
SB1918		456763637743600	1
SB1920		476763677742600	1
SB0961	3748	476773777777600	1
SB1927		676633677777200	1
SB1773		616773777177200	1
SB0334		476743677777600	1
SB2436		200023717207600	1
SB0342		616743777763600	1
SB0330		616773777777000	1
SB0910		606673777777600	1
SB0915		616773777437200	1
SB0907		676773777747000	1
SB0871		676373777777600	1
SB0940		614073777737600	1
SB0924		676773777045600	1
SB0898		676773402017600	1
SB0921		676773777740200	1
SB0911		676600077777600	1
SB0902		616773777570600	1
SB0931		616773776163600	1
SB0941		676773617777600	1
SB0949		676701777767600	1
SB0918		676773777767400	1
SB0930		676773777717600	1
SB0939		676073777767600	1
SB0900		400000017777600	1
SB0899		672773776377600	1
SB0424		002002007000000	1
SB2404		676773757767600	1
SB1004		200003777203600	1
SB1201		200023777237600	1
SB1203		200003777237600	1
SB0284		074002007177200	1
SB1758		676573777776600	1
SB1027	2813	676773776277600	1
SB0960	2873	676773777700200	1
SB0661		664063774037600	1
SB0663	829	640003777777600	1
SB0669	1306	264063777777600	1
SB0670		664063377777600	1
SB0672		664063777767600	1
SB0675		674063777777600	1
SB0979		664073777763200	1
SB0958		600073774037600	1
SB0976		640073774037600	1
SB0464		664073677563600	1
SB0297		676463777777600	1
SB0009		664063777777200	1
SB0993		664073775777600	1
SB1185	2131	676573477777600	1
SB1527		664063777777400	1
SB1529		676473777757600	1
SB1206		662773777477600	1
SB1060	1842	476763777777600	1
SB1205		676303777777600	1
SB1550		674773777777600	1
SB1546	1989	656773377777600	1
SB0838		676773777757600	1
SB1540		614003777777600	1
SB1544		600000004037600	1
SB0419		200023777377600	1
SB0156		270000036763600	1
SB0333		666743677777600	1
SB0591		676777677777200	1
SB0137		616773777771600	1
SB0335		464743677767600	1
SB0126		666773677737600	1
SB1175		616000006777600	1
SB2097	3423	676373777776600	1
SB0965	422	676773667777600	1
SB0970		674243676763600	1
SB0998		676533777777600	1
SB1058	1857	676573777177600	1
SB1062	3707	676573777775600	1
SB1231		676773777774600	1
SB1256		006773777777600	1
SB1262		400000074037600	1
SB1285		676143677477600	1
SB1288		676573677577600	1
SB1291		612773677777600	1
SB1304		204773674017600	1
SB1311		272773777777600	1
SB1324		666773777777600	1
SB1328		676773677774200	1
SB1330		676773674143600	1
SB1335		676773677637600	1
SB1342		676773617757600	1
SB1360		646773777667600	1
SB1383		672733777777600	1
SB1390		616763774377600	1
SB1396		676733617747600	1
SB1400		640773677777600	1
SB1595	3710	676773577777600	1
SB1631		674173677077600	1
SB1636		676763677775600	1
SB1642		666773674177600	1
SB1644		676562077777600	1
SB1647		676573774007600	1
SB1654		674173677777600	1
SB1659		676741377756600	1
SB1663		676773677770600	1
SB1666		676773474177600	1
SB1673		676773674000200	1
SB1679		602673677777600	1
SB1684		606763677777600	1
SB1688		602421777777400	1
SB1803		672773677777200	1
SB1876		476173677777200	1
SB1894		636773377757600	1
SB1901		602773707777600	1
SB1964		636573637777600	1
SB1968		674773677777600	1
SB1974		676733777777000	1
SB1977		602773677777200	1
SB1980		476773676037200	1
SB1987		656773677777200	1
SB1990		416773677777200	1
SB1992		664073777000600	1
SB2000		606773674177600	1
SB2003		676763477777600	1
SB2005		676762037777600	1
SB1083		200003777607600	1
SB1690		200003757377600	1
SB1900		200003317207600	1
SB0901		616673777777600	1
SB0259		676773772000600	1
SB0991	3759	616773775777600	1
SB0990		604073777777600	1
SB1930		676773672000000	1
SB1080		200003776207600	1
SB1915		200003777373600	1
SB1924		660073777777600	1
SB1921		476773757747600	1
SB1928		676703777777600	1
SB1919		472733777777600	1
SB1622	1599	000003777377600	1
SB1870		200003773377600	1
SB2257		676767777777600	1
SB0519		616773677677600	1
SB0322		200003377205200	1
SB0521		676763677775200	1
