# Supplementary material for: SITVITBovis—a publicly available database and mapping tool to get an improved overview of animal and human cases caused by Mycobacterium bovis
Source: Database (Oxford). 2022 Jan 13;2022:baab081. doi: 10.1093/database/baab081 (PMC8962452; doi:10.1093/database/baab081)
Supplement: baab081_Supp [file baab081_supp.zip › Supplementary_Table S2_All_Spoligotypes.xls]

## Sheet: All_Spoligo_SITVITBovis
Supplementary Table S2: SB numbers matching with some SITs numbers from SITVITBovis database
SIT	SB number	Spoligotype Description	Octal code	Lineage	Nb of strains
		££££££££££££££££££££¢¢¢¢£££££££££££££££££££	000000170000000	BOV_4-CAPRAE	1
		££££££££££££££££££¢£££££££££¢££££££££££££££	000000400200000	BOV_4-CAPRAE	1
	SB1872	££££££££££££££££££¢¢¢££¢¢¢¢£¢££££¢¢¢¢¢£££££	000000717207600	BOV_4-CAPRAE	1
3658	SB1892	££££££££££££££££££¢¢¢¢¢¢¢¢¢¢¢¢¢¢¢¢¢¢¢¢£££££	000000777777600	BOV	3
968	SB0874	£££££££££££££££££¢¢¢¢£££¢£¢¢¢¢¢¢¢¢¢¢¢¢£££££	000001705777600	BOV	2
969	SB0830	£££££££££££££££££¢¢¢¢£££¢¢¢¢¢¢¢¢¢¢¢¢£££££££	000001707777000	BOV	10
970	SB0819	£££££££££££££££££¢¢¢¢£££¢¢¢¢¢¢¢¢¢¢¢¢¢¢£££££	000001707777600	BOV	30
	SB0909	£££££££££££££££££¢¢¢¢¢££¢£¢¢¢¢¢¢¢¢¢¢¢¢£££££	000001745777600	BOV	1
971	SB0861	£££££££££££££££££¢¢¢¢¢££¢¢¢¢¢¢¢¢¢¢¢¢£££££££	000001747777000	BOV	3
972	SB0853	£££££££££££££££££¢¢¢¢¢££¢¢¢¢¢¢¢¢¢¢¢¢¢¢£££££	000001747777600	BOV	10
		£££££££££££££££££¢¢¢¢¢¢¢¢¢¢£¢££££¢¢¢¢¢£££££	000001777207600	BOV_4-CAPRAE	1
1599	SB1622	££££££££££££££££¢¢¢¢¢¢¢¢¢¢¢£¢¢¢¢¢¢¢¢¢¢£££££	000003777377600	BOV_4-CAPRAE	4
		£££££££££££££££¢£££££££££££££££££££££££££££	000004000000000	BOV	1
		£££££££££££££££¢¢¢£¢¢¢¢¢¢££££££££££££££££££	000007374000000	BOV	1
2434	SB1294	£££££££££££££¢¢£¢¢¢¢¢¢¢¢¢¢¢¢¢¢¢¢¢¢¢¢¢¢£££££	000033777777600	BOV	2
		£££££££££££££¢¢¢¢¢¢¢¢¢£££££££££££££££££££££	000037740000000	BOV	1
		££££££££££££¢££¢¢£££££¢¢¢¢¢££¢¢¢£££££££££££	000046037160000	BOV	1
3687	SB1625	££££££££££££¢¢¢£¢¢¢¢¢¢¢¢¢¢¢¢¢¢¢¢¢¢¢¢¢¢£££££	000073777777600	BOV	2
		£££££££££££¢¢££££££££££££££££££££££££££££££	000140000000000	BOV_4-CAPRAE	1
1845	SB1136	£££££££££££¢¢¢¢£¢¢¢¢¢¢¢¢¢¢¢¢¢¢¢¢¢¢¢¢¢¢£££££	000173777777600	BOV	8
		£££££££££££¢¢¢¢¢¢¢¢¢£££££££££££££££££££££££	000177600000000	BOV	1
		££££££££££¢£££££££££££££££££££££££¢££££££££	000200000002000	BOV_4-CAPRAE	1
		££££££££££¢££¢£££££££££££££££££££££££££££££	000220000000000	BOV_4-CAPRAE	1
		££££££££££¢¢¢¢¢¢¢¢¢¢£££££££££££££££££££££££	000377600000000	BOV	1
	SB1941	£££££££££¢¢¢¢¢¢£¢¢¢¢¢¢¢¢¢¢¢¢¢¢¢¢¢£¢¢¢¢£££££	000773777773600	BOV	1
	SB1519	£££££££££¢¢¢¢¢¢£¢¢¢¢¢¢¢¢¢¢¢¢¢¢¢¢¢¢¢¢¢¢£££££	000773777777600	BOV	1
		££££££££¢££££¢£££££££££££££££££££££££££££££	001020000000000	BOV_4-CAPRAE	1
	SB0424	£££££££¢££££££££¢£££££££¢¢¢££££££££££££££££	002002007000000	BOV_4-CAPRAE	1
3690	SB1650	£££££££¢£¢¢¢¢¢¢£¢¢¢¢£¢¢¢¢¢¢¢¢¢¢¢¢¢¢¢£¢£££££	002773677777200	BOV	2
	SB1697	££££££¢£££££¢¢£££¢¢£££¢£¢¢¢¢¢¢¢¢¢¢¢¢¢¢£££££	004061427777600	BOV	1
		££££££¢£££¢£¢¢£¢¢¢¢¢££¢¢¢¢¢¢¢¢¢££¢¢£¢¢£££££	004267637746600	BOV	1
3557	SB0340	££££££¢¢£¢¢¢¢¢¢£¢¢¢¢£¢¢¢¢¢¢¢¢¢¢¢¢¢¢¢¢¢£££££	006773677777600	BOV	17
	SB1256	££££££¢¢£¢¢¢¢¢¢£¢¢¢¢¢¢¢¢¢¢¢¢¢¢¢¢¢¢¢¢¢¢£££££	006773777777600	BOV	1
	SB1699	£££££¢¢¢£¢¢¢££££¢¢¢¢£¢¢¢¢¢¢¢¢¢¢££¢¢£¢¢£££££	016703677746600	BOV	1
		£££££¢¢¢£¢¢¢¢¢£££¢¢¢¢¢¢¢¢¢¢¢¢¢¢¢¢¢¢¢¢¢£££££	016761777777600	BOV	1
973	SB0883	£££££¢¢¢£¢¢¢¢¢¢£¢¢¢¢¢¢¢¢¢¢¢¢¢¢¢¢¢¢¢¢¢¢£££££	016773777777600	BOV	2
	SB1700	££££¢£¢£££££¢££££¢¢¢¢¢¢£¢¢¢¢£¢¢£££¢£¢¢£££££	024041767542600	BOV	1
	SB1701	££££¢£¢£££££¢¢£££¢¢¢££¢¢¢¢¢¢¢¢¢¢¢¢¢¢¢¢£££££	024061637777600	BOV	1
	SB1702	££££¢£¢£££££¢¢£££¢¢¢¢¢¢¢¢¢¢¢¢¢¢¢¢¢¢¢¢¢£££££	024061777777600	BOV	1
	SB1774	£££¢£££¢£¢¢¢¢¢¢£¢¢¢¢¢¢¢¢¢¢¢¢¢¢¢¢¢¢¢¢¢¢£££££	042773777777600	BOV	1
3855	SB1493	£££¢££¢£££££¢¢££¢¢¢¢¢¢¢¢¢¢¢¢¢¢¢¢¢¢¢¢¢¢£££££	044063777777600	BOV	2
	SB1704	£££¢££¢£££¢£¢¢££¢¢¢¢¢¢¢¢¢¢¢¢¢¢¢££¢¢£¢¢£££££	044263777746600	BOV	1
974	SB0827	£££¢££¢¢£¢¢¢¢¢¢£¢¢¢¢¢¢¢¢¢¢¢¢¢¢¢¢£¢££¢¢£££££	046773777764600	BOV	17
975	SB0825	£££¢££¢¢£¢¢¢¢¢¢£¢¢¢¢¢¢¢¢¢¢¢¢¢¢¢¢£¢¢¢¢¢£££££	046773777767600	BOV	18
	SB1705	£££¢¢£¢£££££¢¢£££¢¢¢¢¢¢£¢¢¢¢¢¢¢¢¢¢¢£¢¢£££££	064061767776600	BOV	1
1307	SB1111	£££¢¢£¢£££££¢¢£££¢¢¢¢¢¢¢¢¢¢¢¢¢¢¢¢¢¢¢¢¢£££££	064061777777600	BOV	3
	SB1706	£££¢¢£¢£££££¢¢££¢¢¢£££££¢¢¢¢¢¢¢¢¢¢¢¢¢¢£££££	064063407777600	BOV	1
	SB1707	£££¢¢£¢£££££¢¢££¢¢¢¢¢¢¢£¢¢¢¢¢¢¢¢¢¢¢¢¢¢£££££	064063767777600	BOV	1
	SB1709	£££¢¢£¢£££££¢¢££¢¢¢¢¢¢¢¢¢¢¢¢¢¢¢¢£¢¢¢¢¢£££££	064063777767600	BOV	1
1305	SB1044	£££¢¢£¢£££££¢¢££¢¢¢¢¢¢¢¢¢¢¢¢¢¢¢¢¢¢¢¢¢¢£££££	064063777777600	BOV	7
1670	SB0484	£££¢¢£¢£££££¢¢¢£¢¢¢¢¢¢¢¢¢¢¢¢¢¢¢¢¢¢¢¢¢¢£££££	064073777777600	BOV	24
	SB1710	£££¢¢£¢£££¢£¢¢££¢¢¢¢¢¢¢¢¢¢¢£££¢££¢¢£¢¢£££££	064263777046600	BOV_4-CAPRAE	1
	SB1711	£££¢¢£¢£££¢£¢¢££¢¢¢¢¢¢¢¢¢¢¢¢¢¢¢££¢¢£¢¢£££££	064263777746600	BOV	1
1309	SB1110	£££¢¢£¢£££¢£¢¢££¢¢¢¢¢¢¢¢¢¢¢¢¢¢¢¢¢¢¢¢¢¢£££££	064263777777600	BOV	3
		£££¢¢£¢¢££¢£¢¢££¢¢¢¢¢¢¢¢¢¢¢¢¢¢¢¢¢¢¢¢¢¢£££££	066263777777600	BOV	1
2103		£££¢¢¢¢££££££££££££££¢¢¢¢¢¢¢¢¢¢¢¢¢¢¢¢¢£££££	074000077777600	BOV	11
2878		£££¢¢¢¢£££££££££££¢£££¢¢££££££££££££¢¢£££££	074000430000600	BOV_4-CAPRAE	3
2879		£££¢¢¢¢£££££££££££¢£££¢¢¢¢¢¢¢¢¢¢¢¢¢¢¢¢£££££	074000437777600	BOV	4
	SB0284	£££¢¢¢¢£££££££££¢£££££££¢¢¢££¢¢¢¢¢¢¢£¢£££££	074002007177200	BOV_4-CAPRAE	1
	SB1365	£££¢¢¢¢¢£¢¢¢¢£¢£¢¢¢¢¢¢¢¢¢¢¢¢¢¢¢¢¢¢¢¢¢¢£££££	076753777777600	BOV	1
	SB1714	£££¢¢¢¢¢£¢¢¢¢¢££¢¢¢¢£¢¢¢¢¢¢¢¢¢¢¢¢¢¢¢¢¢£££££	076763677777600	BOV	1
3584	SB1869	£££¢¢¢¢¢£¢¢¢¢¢¢£¢¢¢¢£¢¢¢¢¢¢¢¢¢¢¢¢¢¢¢£¢£££££	076773677777200	BOV	10
3546	SB1017	£££¢¢¢¢¢£¢¢¢¢¢¢£¢¢¢¢£¢¢¢¢¢¢¢¢¢¢¢¢¢¢¢¢¢£££££	076773677777600	BOV	20
3527	SB1770	£££¢¢¢¢¢£¢¢¢¢¢¢£¢¢¢¢¢¢¢¢¢¢££££¢¢¢¢¢¢¢¢£££££	076773776077600	BOV_4-CAPRAE	38
976	SB0847	£££¢¢¢¢¢£¢¢¢¢¢¢£¢¢¢¢¢¢¢¢¢¢¢¢¢¢¢¢¢¢¢¢¢££££££	076773777777400	BOV	5
977	SB0867	£££¢¢¢¢¢£¢¢¢¢¢¢£¢¢¢¢¢¢¢¢¢¢¢¢¢¢¢¢¢¢¢¢¢¢£££££	076773777777600	BOV	131
1441		£££¢¢¢¢¢£¢¢¢¢¢¢¢¢¢¢¢¢¢¢¢¢¢¢¢¢¢¢¢¢¢¢¢¢¢£££££	076777777777600	BOV	4
	SB1545	£¢£££££££££££££££££££££¢¢¢¢£¢¢¢¢¢¢¢¢¢¢£££££	200000017377600	BOV_4-CAPRAE	1
		£¢£££££££££££££££££££¢¢¢¢¢¢£¢¢¢¢¢¢¢¢¢¢£££££	200000077377600	BOV_4-CAPRAE	1
1810		£¢£££££££££££££££¢£¢¢¢¢¢¢¢¢£¢¢¢¢¢¢¢£¢¢£££££	200001377376600	BOV_4-CAPRAE	4
3718	SB1199	£¢££££££££££££££¢¢£££¢¢¢¢¢¢£¢¢¢¢¢¢¢¢¢¢£££££	200003077377600	BOV_4-CAPRAE	2
	SB1900	£¢££££££££££££££¢¢£¢¢££¢¢¢¢£¢££££¢¢¢¢¢£££££	200003317207600	BOV_4-CAPRAE	1
3717	SB2002	£¢££££££££££££££¢¢£¢¢¢£¢¢¢¢£¢££££¢¢¢¢¢£££££	200003357207600	BOV_4-CAPRAE	3
3714	SB1084	£¢££££££££££££££¢¢£¢¢¢¢£¢¢¢£¢££££¢¢¢¢¢£££££	200003367207600	BOV_4-CAPRAE	251
1108	SB1908	£¢££££££££££££££¢¢£¢¢¢¢¢£££££££££££££££££££	200003370000000	BOV_4-CAPRAE	4
	SB0322	£¢££££££££££££££¢¢£¢¢¢¢¢¢¢¢£¢££££¢£¢£¢£££££	200003377205200	BOV_4-CAPRAE	1
644	SB0415	£¢££££££££££££££¢¢£¢¢¢¢¢¢¢¢£¢££££¢¢¢¢¢£££££	200003377207600	BOV_4-CAPRAE	85
1604	SB1909	£¢££££££££££££££¢¢£¢¢¢¢¢¢¢¢£¢¢¢¢¢¢¢¢¢¢£££££	200003377377600	BOV_4-CAPRAE	2
1109	SB2174	£¢££££££££££££££¢¢¢££££££££££££¢¢¢¢¢¢¢£££££	200003400037600	BOV_4-CAPRAE	6
	SB1078	£¢££££££££££££££¢¢¢¢£££¢¢¢¢£¢££££¢¢¢¢¢£££££	200003617207600	BOV_4-CAPRAE	1
	SB1910	£¢££££££££££££££¢¢¢¢££¢¢¢¢¢£¢¢¢£££¢¢¢¢£££££	200003637343600	BOV_4-CAPRAE	1
		£¢££££££££££££££¢¢¢¢£¢¢¢¢¢¢£¢¢¢¢¢¢¢£¢¢£££££	200003677376600	BOV_4-CAPRAE	1
3716	SB1081	£¢££££££££££££££¢¢¢¢¢££¢£££££££££££££££££££	200003710000000	BOV_4-CAPRAE	13
	SB1618	£¢££££££££££££££¢¢¢¢¢££¢¢¢¢£¢££££¢££¢¢£££££	200003717204600	BOV_4-CAPRAE	1
	SB1911	£¢££££££££££££££¢¢¢¢¢££¢¢¢¢£¢££££¢¢¢¢££££££	200003717207400	BOV_4-CAPRAE	1
645	SB0157	£¢££££££££££££££¢¢¢¢¢££¢¢¢¢£¢££££¢¢¢¢¢£££££	200003717207600	BOV_4-CAPRAE	744
	SB1690	£¢££££££££££££££¢¢¢¢¢¢£¢¢¢¢£¢¢¢¢¢¢¢¢¢¢£££££	200003757377600	BOV_4-CAPRAE	1
818	SB0866	£¢££££££££££££££¢¢¢¢¢¢¢¢£££££££££££££££££££	200003770000000	BOV_4-CAPRAE	36
1600	SB1912	£¢££££££££££££££¢¢¢¢¢¢¢¢££££££££££¢¢¢¢£££££	200003770003600	BOV_4-CAPRAE	3
	SB1870	£¢££££££££££££££¢¢¢¢¢¢¢¢£¢¢£¢¢¢¢¢¢¢¢¢¢£££££	200003773377600	BOV_4-CAPRAE	1
1636	SB1913	£¢££££££££££££££¢¢¢¢¢¢¢¢¢£££££¢¢¢¢£¢¢¢£££££	200003774075600	BOV_4-CAPRAE	3
3715	SB1077	£¢££££££££££££££¢¢¢¢¢¢¢¢¢£££¢££££¢¢¢¢¢£££££	200003774207600	BOV_4-CAPRAE	17
		£¢££££££££££££££¢¢¢¢¢¢¢¢¢¢£££££££¢¢¢¢¢£££££	200003776007600	BOV_4-CAPRAE	1
	SB1080	£¢££££££££££££££¢¢¢¢¢¢¢¢¢¢££¢££££¢¢¢¢¢£££££	200003776207600	BOV_4-CAPRAE	1
	SB1004	£¢££££££££££££££¢¢¢¢¢¢¢¢¢¢¢£¢£££££¢¢¢¢£££££	200003777203600	BOV_4-CAPRAE	1
646	SB0416	£¢££££££££££££££¢¢¢¢¢¢¢¢¢¢¢£¢££££¢¢¢¢¢£££££	200003777207600	BOV_4-CAPRAE	290
	SB1203	£¢££££££££££££££¢¢¢¢¢¢¢¢¢¢¢£¢££¢¢¢¢¢¢¢£££££	200003777237600	BOV_4-CAPRAE	1
		£¢££££££££££££££¢¢¢¢¢¢¢¢¢¢¢£¢¢¢£¢¢¢¢£££££££	200003777357000	BOV_4-CAPRAE	1
978	SB0835	£¢££££££££££££££¢¢¢¢¢¢¢¢¢¢¢£¢¢¢£¢¢¢¢¢¢£££££	200003777357600	BOV_4-CAPRAE	10
	SB1902	£¢££££££££££££££¢¢¢¢¢¢¢¢¢¢¢£¢¢¢¢£££¢¢¢£££££	200003777361600	BOV_4-CAPRAE	1
1635	SB1914	£¢££££££££££££££¢¢¢¢¢¢¢¢¢¢¢£¢¢¢¢££¢¢¢¢£££££	200003777363600	BOV_4-CAPRAE	2
	SB1915	£¢££££££££££££££¢¢¢¢¢¢¢¢¢¢¢£¢¢¢¢¢£¢¢¢¢£££££	200003777373600	BOV_4-CAPRAE	1
	SB2674	£¢££££££££££££££¢¢¢¢¢¢¢¢¢¢¢£¢¢¢¢¢¢£¢¢¢£££££	200003777375600	BOV_4-CAPRAE	1
1596	SB1916	£¢££££££££££££££¢¢¢¢¢¢¢¢¢¢¢£¢¢¢¢¢¢¢¢£¢£££££	200003777377200	BOV_4-CAPRAE	2
647	SB0418	£¢££££££££££££££¢¢¢¢¢¢¢¢¢¢¢£¢¢¢¢¢¢¢¢¢¢£££££	200003777377600	BOV_4-CAPRAE	164
	SB1083	£¢££££££££££££££¢¢¢¢¢¢¢¢¢¢¢¢¢££££¢¢¢¢¢£££££	200003777607600	BOV	1
979	SB2393	£¢££££££££££££££¢¢¢¢¢¢¢¢¢¢¢¢¢¢¢¢¢¢¢¢¢¢£££££	200003777777600	BOV	3
	SB2436	£¢£££££££££££¢££¢¢¢¢¢££¢¢¢¢£¢££££¢¢¢¢¢£££££	200023717207600	BOV_4-CAPRAE	1
	SB1201	£¢£££££££££££¢££¢¢¢¢¢¢¢¢¢¢¢£¢££¢¢¢¢¢¢¢£££££	200023777237600	BOV_4-CAPRAE	1
	SB0419	£¢£££££££££££¢££¢¢¢¢¢¢¢¢¢¢¢£¢¢¢¢¢¢¢¢¢¢£££££	200023777377600	BOV_4-CAPRAE	1
648	SB0417	£¢£££££££££¢££££¢¢¢¢¢££¢¢¢¢£¢££££¢¢¢¢¢£££££	200103717207600	BOV_4-CAPRAE	2
	SB1304	£¢££££¢££¢¢¢¢¢¢£¢¢¢¢£¢¢¢¢£££££££¢¢¢¢¢¢£££££	204773674017600	BOV_4-CAPRAE	1
		£¢£¢££¢££££££££¢£££££££££££££££££££££££££££	244004000000000	BOV	1
3736	SB1432	£¢£¢££¢¢£¢¢¢¢¢¢£¢¢¢¢¢¢¢¢¢¢¢¢¢£¢¢¢¢¢¢¢¢£££££	246773777677600	BOV_1	5
	SB2190	£¢£¢£¢¢¢£¢£££¢££¢¢¢¢¢¢¢¢¢¢¢¢££££££¢£¢¢£££££	256423777402600	BOV	1
3753	SB0425	£¢£¢£¢¢¢£¢£££¢¢£¢¢¢¢¢¢¢¢¢¢¢¢££££££¢£¢¢£££££	256433777402600	BOV_1	6
3744	SB1464	£¢£¢¢££¢£¢¢¢¢¢££¢¢¢¢¢¢¢¢¢¢¢¢¢¢¢¢¢¢¢£¢¢£££££	262763777776600	BOV	2
	SB1406	£¢£¢¢££¢£¢¢¢¢¢¢£¢¢¢¢¢¢¢¢¢¢¢¢¢¢¢£¢¢¢£¢¢£££££	262773777756600	BOV_1	1
1598	SB1898	£¢£¢¢££¢£¢¢¢¢¢¢£¢¢¢¢¢¢¢¢¢¢¢¢¢¢¢¢¢£¢£¢¢£££££	262773777772600	BOV_1	3
3751	SB1405	£¢£¢¢££¢£¢¢¢¢¢¢£¢¢¢¢¢¢¢¢¢¢¢¢¢¢¢¢¢¢¢£¢¢£££££	262773777776600	BOV_1	3
1306	SB0669	£¢£¢¢£¢£££££¢¢££¢¢¢¢¢¢¢¢¢¢¢¢¢¢¢¢¢¢¢¢¢¢£££££	264063777777600	BOV	4
1858	SB0986	£¢£¢¢£¢£££££¢¢¢££¢¢¢¢¢¢¢¢¢¢¢¢¢¢¢¢¢¢¢¢¢£££££	264071777777600	BOV	4
2874		£¢£¢¢£¢£££££¢¢¢£¢¢¢¢¢£¢¢¢¢¢¢¢¢¢¢¢¢¢¢¢¢£££££	264073737777600	BOV_2	3
3853	SB1413	£¢£¢¢£¢£££££¢¢¢£¢¢¢¢¢¢¢¢¢£¢¢¢¢¢¢¢¢¢¢¢¢£££££	264073775777600	BOV_2	2
409	SB0673	£¢£¢¢£¢£££££¢¢¢£¢¢¢¢¢¢¢¢¢¢¢¢¢¢¢¢¢¢¢¢¢¢£££££	264073777777600	BOV_2	55
	SB1715	£¢£¢¢£¢¢££££¢¢££¢¢¢¢¢¢¢¢¢¢¢¢¢¢¢¢¢¢¢¢¢¢£££££	266063777777600	BOV	1
	SB1813	£¢£¢¢£¢¢££££¢¢¢£¢¢¢¢¢¢¢¢¢¢¢¢¢¢¢¢¢¢¢¢¢¢£££££	266073777777600	BOV	1
3566	SB1301	£¢£¢¢£¢¢£¢¢¢¢¢¢£¢¢¢¢£¢¢¢¢£££££££¢¢¢¢¢¢£££££	266773674017600	BOV_4-CAPRAE	13
	SB0156	£¢£¢¢¢££££££££££££££££¢¢¢¢£¢¢¢¢¢££¢¢¢¢£££££	270000036763600	BOV	1
	SB1311	£¢£¢¢¢£¢£¢¢¢¢¢¢£¢¢¢¢¢¢¢¢¢¢¢¢¢¢¢¢¢¢¢¢¢¢£££££	272773777777600	BOV_1	1
	SB0904	£¢£¢¢¢¢¢£¢£¢¢¢¢£¢¢¢¢¢£¢¢¢¢¢¢¢¢¢¢¢¢¢¢¢¢£££££	276573737777600	BOV_1	1
3677	SB1319	£¢£¢¢¢¢¢£¢£¢¢¢¢£¢¢¢¢¢¢¢¢¢¢¢¢¢¢¢¢¢¢¢¢¢¢£££££	276573777777600	BOV_1	2
		£¢£¢¢¢¢¢£¢¢¢¢¢££¢¢¢¢¢¢¢¢¢¢¢¢¢¢¢¢¢¢¢¢¢¢£££££	276763777777600	BOV	1
3854	SB1143	£¢£¢¢¢¢¢£¢¢¢¢¢¢£¢¢¢¢£¢¢¢¢£¢¢¢¢¢¢¢¢¢¢¢¢£££££	276773675777600	BOV_1	2
3702	SB1979	£¢£¢¢¢¢¢£¢¢¢¢¢¢£¢¢¢¢£¢¢¢¢¢¢¢¢¢¢¢¢¢¢¢£¢£££££	276773677777200	BOV_1	2
3532	SB0122	£¢£¢¢¢¢¢£¢¢¢¢¢¢£¢¢¢¢£¢¢¢¢¢¢¢¢¢¢¢¢¢¢¢¢¢£££££	276773677777600	BOV_1	38
2370	SB0948	£¢£¢¢¢¢¢£¢¢¢¢¢¢£¢¢¢¢¢¢¢¢¢¢¢¢¢¢¢¢¢¢¢¢¢¢£££££	276773777777600	BOV_1	12
	SB0900	¢££££££££££££££££££££££¢¢¢¢¢¢¢¢¢¢¢¢¢¢¢£££££	400000017777600	BOV	1
	SB1262	¢££££££££££££££££££££¢¢¢¢££££££¢¢¢¢¢¢¢£££££	400000074037600	BOV	1
3581	SB1189	¢££££££££££££££££££££¢¢¢¢¢¢¢££¢¢¢¢¢¢¢¢£££££	400000077477600	BOV	10
3559	SB1387	¢££££££££££££££££££££¢¢¢¢¢¢¢¢¢¢¢¢¢¢£¢¢£££££	400000077776600	BOV	17
3583	SB1656	¢££££££££££££££££££££¢¢¢¢¢¢¢¢¢¢¢¢¢¢¢¢££££££	400000077777400	BOV	9
980	SB0152	¢££££££££££££££££££££¢¢¢¢¢¢¢¢¢¢¢¢¢¢¢¢¢£££££	400000077777600	BOV	356
	SB1152	¢£££££££££££££££££¢¢¢¢¢¢¢¢¢¢¢¢¢¢¢¢¢¢¢¢£££££	400000777777600	BOV	1
		¢£££££££££££££££¢¢¢£££¢¢¢¢£¢¢¢¢£££¢££¢£££££	400003436742200	BOV	1
1984		¢£££££££££¢¢¢£££¢¢¢£££¢¢¢¢£¢¢¢¢£££¢££¢£££££	400343436742200	BOV	2
		¢£££££££££¢¢¢¢¢¢£££££££££££££££££££££££££££	400374000000000	BOV	1
3552	SB1623	¢££££££££¢¢¢¢¢¢£¢¢¢¢¢¢¢¢¢¢¢¢¢¢¢¢¢¢¢¢¢¢£££££	400773777777600	BOV	22
3749	SB1477	¢££££££¢£¢¢¢¢¢¢£¢¢¢¢¢¢¢¢¢¢¢¢¢¢¢£¢¢¢¢¢¢£££££	402773777757600	BOV	9
	SB0906	¢£££££¢¢£¢¢¢¢¢¢£¢¢¢¢¢¢¢¢¢¢¢¢¢¢¢¢¢£¢¢¢¢£££££	406773777773600	BOV	1
		¢££££¢¢£££¢£££££¢¢¢¢££¢££¢¢¢££¢£££¢££££££££	414203623442000	BOV	1
		¢££££¢¢£££¢¢¢£££¢¢¢£££¢¢¢¢£¢¢£¢£££¢££¢£££££	414343436642200	BOV	1
1994		¢££££¢¢£££¢¢¢£££¢¢¢£££¢¢¢¢£¢¢¢¢£££¢££¢£££££	414343436742200	BOV	2
		¢££££¢¢£££¢¢¢£££¢¢¢¢££¢¢¢££¢¢£¢££¢¢££¢£££££	414343634646200	BOV	1
2727	SB1153	¢££££¢¢£££¢¢¢¢££¢¢¢¢¢¢¢¢¢¢¢¢¢¢¢¢¢¢¢¢¢¢£££££	414363777777600	BOV	2
	SB0485	¢££££¢¢¢£¢¢¢¢¢¢£¢¢¢¢£¢¢¢¢¢¢¢£¢¢¢££¢¢¢¢£££££	416773677563600	BOV	1
	SB1990	¢££££¢¢¢£¢¢¢¢¢¢£¢¢¢¢£¢¢¢¢¢¢¢¢¢¢¢¢¢¢¢£¢£££££	416773677777200	BOV	1
1605	SB1917	¢££££¢¢¢£¢¢¢¢¢¢£¢¢¢¢£¢¢¢¢¢¢¢¢¢¢¢¢¢¢¢¢¢£££££	416773677777600	BOV	3
		¢££££¢¢¢£¢¢¢¢¢¢£¢¢¢¢¢¢¢¢¢¢¢£££££££££¢¢£££££	416773777000600	BOV	1
981	SB0846	¢££££¢¢¢£¢¢¢¢¢¢£¢¢¢¢¢¢¢¢¢¢¢¢¢¢¢¢¢¢¢¢£££££££	416773777777000	BOV	5
	SB1775	¢££££¢¢¢£¢¢¢¢¢¢£¢¢¢¢¢¢¢¢¢¢¢¢¢¢¢¢¢¢¢¢£¢£££££	416773777777200	BOV	1
982	SB0875	¢££££¢¢¢£¢¢¢¢¢¢£¢¢¢¢¢¢¢¢¢¢¢¢¢¢¢¢¢¢¢¢¢¢£££££	416773777777600	BOV	83
	SB0347	¢£££¢£¢£££££¢£££¢¢¢¢££¢¢¢¢£¢¢¢¢££¢¢£¢¢£££££	424043636746600	BOV	1
	SB1717	¢£££¢£¢£££££¢¢£££¢¢¢¢¢¢¢¢¢¢¢¢¢¢¢¢¢¢¢¢¢£££££	424061777777600	BOV	1
	SB0445	¢£££¢¢£££££££££££¢£££¢¢¢¢¢¢¢¢¢¢¢¢¢¢¢¢¢£££££	430001077777600	BOV	1
	SB1718	¢£££¢¢¢££££¢¢¢£££¢¢¢¢¢¢¢¢¢¢£££¢¢¢¢¢¢¢¢£££££	434161777077600	BOV	1
	SB1680	¢£££¢¢¢££¢¢¢¢¢££¢¢¢¢£¢¢¢¢¢£¢¢¢¢¢¢¢¢¢¢¢£££££	434763676777600	BOV	1
	SB1719	¢£££¢¢¢¢£¢¢¢¢¢£££¢¢¢££¢¢¢¢¢¢¢¢¢¢¢¢¢¢¢¢£££££	436761637777600	BOV	1
3543	SB1358	¢£££¢¢¢¢£¢¢¢¢¢££¢¢¢¢£¢¢¢¢¢£¢¢¢¢¢¢¢¢¢¢¢£££££	436763676777600	BOV	23
3588	SB0969	¢£££¢¢¢¢£¢¢¢¢¢¢£¢¢¢£££¢¢¢¢¢¢¢¢¢¢¢¢¢¢¢¢£££££	436773437777600	BOV	7
	SB1643	¢£££¢¢¢¢£¢¢¢¢¢¢£¢¢¢¢£¢¢¢¢££¢¢¢¢¢¢¢¢¢¢¢£££££	436773674777600	BOV	1
3509	SB1305	¢£££¢¢¢¢£¢¢¢¢¢¢£¢¢¢¢£¢¢¢¢¢£¢¢¢¢¢¢¢¢¢¢¢£££££	436773676777600	BOV	135
	SB1986	¢£££¢¢¢¢£¢¢¢¢¢¢£¢¢¢¢£¢¢¢¢¢¢££¢¢¢¢¢££¢¢£££££	436773677174600	BOV	1
	SB1331	¢£££¢¢¢¢£¢¢¢¢¢¢£¢¢¢¢£¢¢¢¢¢¢¢££¢¢¢¢¢¢¢¢£££££	436773677477600	BOV	1
650	SB0341	¢£££¢¢¢¢£¢¢¢¢¢¢£¢¢¢¢£¢¢¢¢¢¢¢¢¢¢¢¢¢££¢¢£££££	436773677774600	BOV	29
3556	SB0124	¢£££¢¢¢¢£¢¢¢¢¢¢£¢¢¢¢£¢¢¢¢¢¢¢¢¢¢¢¢¢¢¢¢¢£££££	436773677777600	BOV	21
	SB1720	¢££¢££££££££££££¢¢¢¢¢¢¢£¢¢¢¢¢¢¢¢¢¢¢¢¢¢£££££	440003767777600	BOV	1
	SB1721	¢££¢££££££££££££¢¢¢¢¢¢¢¢¢¢¢¢¢£¢¢¢¢¢¢¢¢£££££	440003777677600	BOV	1
1299	SB1114	¢££¢££££££££££££¢¢¢¢¢¢¢¢¢¢¢¢¢¢¢¢¢¢¢¢¢¢£££££	440003777777600	BOV	4
752	SB0662	¢££¢££££££££££¢£¢¢¢¢¢¢¢¢¢¢¢¢¢¢¢¢¢¢¢¢¢¢£££££	440013777777600	BOV	3
		¢££¢£££¢££¢¢¢£££¢¢¢¢£¢¢¢¢¢¢¢¢¢¢¢¢¢¢££¢£££££	442343677776200	BOV	1
3587	SB1375	¢££¢££¢¢£¢¢¢¢¢¢£¢¢¢¢¢¢¢¢¢¢¢¢¢¢¢¢£¢¢¢¢¢£££££	446773777767600	BOV	8
		¢££¢£¢¢£££¢¢¢¢££¢¢¢¢££¢¢¢¢¢¢¢£¢££¢¢££¢£££££	454363637646200	BOV	1
		¢££¢£¢¢££¢£¢¢¢¢£¢¢¢¢¢¢¢¢¢¢¢¢¢¢¢¢¢¢¢¢¢¢£££££	454573777777600	BOV	1
	SB1918	¢££¢£¢¢¢£¢¢¢¢¢££¢¢¢¢££¢¢¢¢¢¢¢¢¢£££¢¢¢¢£££££	456763637743600	BOV	1
3655	SB1685	¢££¢£¢¢¢£¢¢¢¢¢¢£¢¢¢¢£¢¢¢¢¢¢¢¢¢¢¢¢¢¢¢¢¢£££££	456773677777600	BOV	3
	SB0936	¢££¢¢£¢£££££¢£££££¢¢¢¢¢¢¢¢¢¢¢¢¢¢¢¢¢¢¢¢£££££	464040777777600	BOV	1
	SB0313	¢££¢¢£¢£££££¢£££¢¢¢¢£¢¢¢¢¢£¢¢¢¢£££¢££¢£££££	464043676742200	BOV	1
	SB0346	¢££¢¢£¢£££££¢£££¢¢¢¢£¢¢¢¢¢¢¢¢¢¢¢¢¢¢¢¢¢£££££	464043677777600	BOV	1
		¢££¢¢£¢£££££¢£££¢¢¢¢¢¢¢¢¢¢¢¢¢¢¢£££¢££¢£££££	464043777742200	BOV	1
	SB1733	¢££¢¢£¢£££££¢¢££¢¢¢¢¢¢¢¢¢¢¢¢£¢¢¢£¢¢¢¢¢£££££	464063777567600	BOV	1
	SB0306	¢££¢¢£¢£££££¢¢££¢¢¢¢¢¢¢¢¢¢¢¢£¢¢¢¢¢¢¢¢¢£££££	464063777577600	BOV	1
	SB1501	¢££¢¢£¢£££££¢¢££¢¢¢¢¢¢¢¢¢¢¢¢¢¢££££££¢¢£££££	464063777700600	BOV	1
	SB0291	¢££¢¢£¢£££££¢¢££¢¢¢¢¢¢¢¢¢¢¢¢¢¢¢¢¢¢££¢¢£££££	464063777774600	BOV	1
651	SB0345	¢££¢¢£¢£££££¢¢££¢¢¢¢¢¢¢¢¢¢¢¢¢¢¢¢¢¢¢¢¢¢£££££	464063777777600	BOV	2
		¢££¢¢£¢£££££¢¢¢£¢£££¢¢¢¢¢¢¢¢¢¢¢¢¢¢¢¢¢¢£££££	464072177777600	BOV	1
1851	SB0996	¢££¢¢£¢£££££¢¢¢£¢¢¢¢¢¢¢¢¢¢¢¢¢¢¢¢¢¢¢¢¢¢£££££	464073777777600	BOV	2
1310	SB1735	¢££¢¢£¢£££¢££¢££¢¢¢¢¢¢¢¢¢¢¢¢¢¢¢¢¢¢££¢¢£££££	464223777774600	BOV	2
	SB0335	¢££¢¢£¢££¢¢¢¢£££¢¢¢¢£¢¢¢¢¢¢¢¢¢¢¢£¢¢¢¢¢£££££	464743677767600	BOV	1
3620	SB1989	¢££¢¢£¢¢£¢¢¢¢¢¢£¢¢¢¢£¢¢¢¢¢¢¢¢¢¢¢¢¢¢¢¢¢£££££	466773677777600	BOV	6
3760	SB1410	¢££¢¢£¢¢£¢¢¢¢¢¢£¢¢¢¢¢¢¢¢¢¢¢¢¢£¢¢¢¢¢¢¢¢£££££	466773777677600	BOV	2
	SB1919	¢££¢¢¢£¢£¢¢¢£¢¢£¢¢¢¢¢¢¢¢¢¢¢¢¢¢¢¢¢¢¢¢¢¢£££££	472733777777600	BOV	1
		¢££¢¢¢£¢£¢¢¢¢¢££¢¢¢¢£¢¢¢¢¢¢¢¢¢¢¢¢£¢¢¢¢£££££	472763677773600	BOV	1
		¢££¢¢¢¢£££££¢£¢£¢¢¢¢¢¢¢¢¢¢¢¢¢¢¢¢¢¢¢¢¢¢£££££	474053777777600	BOV	1
	SB0674	¢££¢¢¢¢£££££¢¢££¢¢¢¢¢¢¢¢¢¢¢¢¢¢¢¢¢¢¢¢¢¢£££££	474063777777600	BOV	1
1817	SB1052	¢££¢¢¢¢££¢£¢¢¢££¢¢¢¢¢¢¢¢¢¢¢¢¢¢¢¢¢¢¢¢¢¢£££££	474563777777600	BOV	2
	SB1280	¢££¢¢¢¢££¢¢¢¢¢¢£¢¢¢¢£¢¢¢¢££££¢¢¢¢¢¢¢¢¢£££££	474773674177600	BOV	1
	SB1876	¢££¢¢¢¢¢£££¢¢¢¢£¢¢¢¢£¢¢¢¢¢¢¢¢¢¢¢¢¢¢¢£¢£££££	476173677777200	BOV	1
		¢££¢¢¢¢¢££¢¢£¢££¢¢¢££¢¢¢¢¢£¢¢¢¢¢¢¢¢¢¢¢£££££	476323476777600	BOV	1
		¢££¢¢¢¢¢££¢¢¢£££¢¢¢¢¢¢¢¢¢¢¢¢¢¢¢¢¢£¢¢¢¢£££££	476343777773600	BOV	1
3079		¢££¢¢¢¢¢££¢¢¢¢££¢¢¢¢££¢¢¢¢£¢¢¢¢£¢¢¢££¢£££££	476363636756200	BOV	2
3633	SB1971	¢££¢¢¢¢¢£¢£¢¢¢¢£¢¢¢¢£¢¢¢¢¢¢¢¢¢¢¢¢¢¢¢£¢£££££	476573677777200	BOV	4
	SB1382	¢££¢¢¢¢¢£¢£¢¢¢¢£¢¢¢¢¢¢¢¢¢¢¢¢¢¢¢¢¢¢¢¢¢¢£££££	476573777777600	BOV	1
	SB0334	¢££¢¢¢¢¢£¢¢¢¢£££¢¢¢¢£¢¢¢¢¢¢¢¢¢¢¢¢¢¢¢¢¢£££££	476743677777600	BOV	1
		¢££¢¢¢¢¢£¢¢¢¢£££¢¢¢¢¢¢¢¢¢¢¢¢¢¢¢¢¢¢¢¢¢¢£££££	476743777777600	BOV	1
	SB1920	¢££¢¢¢¢¢£¢¢¢¢¢££¢¢¢¢£¢¢¢¢¢¢¢¢¢¢£££¢£¢¢£££££	476763677742600	BOV	1
1819	SB1053	¢££¢¢¢¢¢£¢¢¢¢¢££¢¢¢¢£¢¢¢¢¢¢¢¢¢¢¢¢¢¢¢£¢£££££	476763677777200	BOV	4
3585	SB1264	¢££¢¢¢¢¢£¢¢¢¢¢££¢¢¢¢£¢¢¢¢¢¢¢¢¢¢¢¢¢¢¢¢¢£££££	476763677777600	BOV	8
1842	SB1060	¢££¢¢¢¢¢£¢¢¢¢¢££¢¢¢¢¢¢¢¢¢¢¢¢¢¢¢¢¢¢¢¢¢¢£££££	476763777777600	BOV	3
	SB1686	¢££¢¢¢¢¢£¢¢¢¢¢¢£¢¢¢¢£¢¢¢¢££££¢¢¢¢¢¢¢¢¢£££££	476773674177600	BOV	1
	SB1980	¢££¢¢¢¢¢£¢¢¢¢¢¢£¢¢¢¢£¢¢¢¢¢£££££¢¢¢¢¢£¢£££££	476773676037200	BOV	1
3662	SB0966	¢££¢¢¢¢¢£¢¢¢¢¢¢£¢¢¢¢£¢¢¢¢¢¢¢¢¢¢¢¢¢¢£¢¢£££££	476773677776600	BOV	2
3647	SB1379	¢££¢¢¢¢¢£¢¢¢¢¢¢£¢¢¢¢£¢¢¢¢¢¢¢¢¢¢¢¢¢¢¢£££££££	476773677777000	BOV	3
3510	SB1190	¢££¢¢¢¢¢£¢¢¢¢¢¢£¢¢¢¢£¢¢¢¢¢¢¢¢¢¢¢¢¢¢¢£¢£££££	476773677777200	BOV	119
	SB0164	¢££¢¢¢¢¢£¢¢¢¢¢¢£¢¢¢¢£¢¢¢¢¢¢¢¢¢¢¢¢¢¢¢¢££££££	476773677777400	BOV	1
3547	SB1095	¢££¢¢¢¢¢£¢¢¢¢¢¢£¢¢¢¢£¢¢¢¢¢¢¢¢¢¢¢¢¢¢¢¢¢£££££	476773677777600	BOV	23
	SB1921	¢££¢¢¢¢¢£¢¢¢¢¢¢£¢¢¢¢¢¢£¢¢¢¢¢¢¢¢££¢¢¢¢¢£££££	476773757747600	BOV	1
	SB1922	¢££¢¢¢¢¢£¢¢¢¢¢¢£¢¢¢¢¢¢¢¢¢¢¢££¢¢¢¢¢¢¢¢¢£££££	476773777177600	BOV	1
	SB2182	¢££¢¢¢¢¢£¢¢¢¢¢¢£¢¢¢¢¢¢¢¢¢¢¢£¢¢¢¢¢¢¢¢£¢£££££	476773777377200	BOV	1
3849	SB1923	¢££¢¢¢¢¢£¢¢¢¢¢¢£¢¢¢¢¢¢¢¢¢¢¢¢¢£££¢¢¢¢¢¢£££££	476773777617600	BOV	2
3720	SB1099	¢££¢¢¢¢¢£¢¢¢¢¢¢£¢¢¢¢¢¢¢¢¢¢¢¢¢£¢¢¢¢¢¢¢¢£££££	476773777677600	BOV	6
	SB0925	¢££¢¢¢¢¢£¢¢¢¢¢¢£¢¢¢¢¢¢¢¢¢¢¢¢¢¢¢£££¢¢¢¢£££££	476773777743600	BOV	1
3748	SB0961	¢££¢¢¢¢¢£¢¢¢¢¢¢£¢¢¢¢¢¢¢¢¢¢¢¢¢¢¢¢¢¢¢¢¢¢£££££	476773777777600	BOV	30
	SB1544	¢¢££££££££££££££££££££££¢££££££¢¢¢¢¢¢¢£££££	600000004037600	BOV	1
657	SB0440	¢¢£££££££££££££££££££££¢¢¢£££¢¢¢¢¢¢¢¢¢£££££	600000016177600	BOV	2
	SB1777	¢¢£££££££££££££££££££££¢¢¢¢¢¢¢££££¢¢¢¢£££££	600000017703600	BOV	1
658	SB0153	¢¢£££££££££££££££££££££¢¢¢¢¢¢¢¢¢¢¢¢¢¢¢£££££	600000017777600	BOV	50
	SB0431	¢¢£££££££££££££££££££¢¢¢£££££££££££££££££££	600000070000000	BOV	1
3640	SB1310	¢¢£££££££££££££££££££¢¢¢¢¢¢¢¢¢¢¢¢¢¢¢¢¢£££££	600000077777600	BOV	3
3844	SB0872	¢¢££££££££££££££¢¢¢¢¢¢¢¢¢¢¢¢¢¢¢¢¢¢¢¢¢¢£££££	600003777777600	BOV	3
		¢¢££££££££££££¢¢¢¢¢¢¢¢¢¢¢¢¢¢¢¢¢¢¢¢¢¢¢¢£££££	600017777777600	BOV	1
3845	SB1537	¢¢£££££££££££¢££¢¢¢¢¢¢¢¢¢¢¢¢¢¢¢¢¢¢¢¢¢¢£££££	600023777777600	BOV	14
3698	SB1689	¢¢£££££££££££¢¢£¢¢¢¢£¢¢¢¢££££¢¢¢¢¢¢¢¢¢£££££	600033674177600	BOV	2
	SB0958	¢¢££££££££££¢¢¢£¢¢¢¢¢¢¢¢¢££££££¢¢¢¢¢¢¢£££££	600073774037600	BOV	1
	SB0922	¢¢££££££££££¢¢¢£¢¢¢¢¢¢¢¢¢¢¢¢¢¢¢¢¢¢¢¢¢¢£££££	600073777777600	BOV	1
3684	SB1391	¢¢££££££££¢¢¢¢££¢¢¢¢¢¢¢¢¢¢¢£¢¢¢¢¢¢¢¢¢¢£££££	600363777377600	BOV	2
3661	SB1996	¢¢££££££££¢¢¢¢¢£¢¢¢¢£¢¢¢¢££££¢¢¢¢¢¢¢¢¢£££££	600373674177600	BOV	3
983	SB0859	¢¢££££££££¢¢¢¢¢£¢¢¢¢¢¢¢¢¢¢¢¢¢¢¢¢¢¢¢¢¢¢£££££	600373777777600	BOV	3
	SB1468	¢¢£££££¢££¢¢¢¢££¢¢¢¢¢¢¢¢¢¢¢¢¢¢¢¢¢¢¢¢¢¢£££££	602363777777600	BOV	1
	SB1688	¢¢£££££¢£¢£££¢£££¢¢¢¢¢¢¢¢¢¢¢¢¢¢¢¢¢¢¢¢££££££	602421777777400	BOV	1
3756	SB1277	¢¢£££££¢£¢£££¢¢£¢¢¢¢¢¢¢¢¢¢¢¢¢¢¢¢¢¢¢¢¢££££££	602433777777400	BOV_1	2
	SB1446	¢¢£££££¢£¢£¢¢¢¢£¢¢¢¢¢¢¢¢¢¢¢¢¢¢¢¢¢¢¢¢¢¢£££££	602573777777600	BOV_1	1
	SB1679	¢¢£££££¢£¢¢£¢¢¢£¢¢¢¢£¢¢¢¢¢¢¢¢¢¢¢¢¢¢¢¢¢£££££	602673677777600	BOV_1	1
	SB1984	¢¢£££££¢£¢¢¢£££££££¢¢¢¢£££¢££££££££££¢£££££	602700361000200	BOV	1
	SB1471	¢¢£££££¢£¢¢¢££££¢£££££¢¢¢¢¢¢¢¢¢¢¢¢¢¢¢¢£££££	602702037777600	BOV	1
659	SB0303	¢¢£££££¢£¢¢¢£¢¢£¢¢¢¢¢¢¢¢¢¢¢¢¢¢¢¢¢¢¢¢¢¢£££££	602733777777600	BOV_1	17
	SB1408	¢¢£££££¢£¢¢¢¢£££¢¢££££¢¢¢¢¢¢¢¢¢¢¢¢¢£¢¢£££££	602743037776600	BOV	1
	SB1404	¢¢£££££¢£¢¢¢¢£££¢¢¢¢¢¢¢¢¢¢¢¢¢¢¢¢¢¢¢¢¢¢£££££	602743777777600	BOV	1
984		¢¢£££££¢£¢¢¢¢£¢£¢¢£¢¢¢¢¢¢¢¢¢¢¢¢¢¢¢¢¢¢¢£££££	602753377777600	BOV_1	2
3745	SB1470	¢¢£££££¢£¢¢¢¢¢££¢£££££¢¢¢¢¢¢¢¢¢¢¢¢¢¢¢¢£££££	602762037777600	BOV	6
3746	SB1467	¢¢£££££¢£¢¢¢¢¢££¢¢¢¢¢¢¢¢¢¢¢¢¢¢¢¢¢¢¢¢¢¢£££££	602763777777600	BOV	2
	SB1469	¢¢£££££¢£¢¢¢¢¢¢£¢£££££¢¢¢¢¢¢¢¢¢¢¢¢¢¢¢¢£££££	602772037777600	BOV_1	1
3752	SB1407	¢¢£££££¢£¢¢¢¢¢¢£¢¢££££¢¢¢¢¢¢¢¢¢¢¢¢¢¢¢¢£££££	602773037777600	BOV_1	3
660	SB0304	¢¢£££££¢£¢¢¢¢¢¢£¢¢¢¢££££¢¢¢¢¢¢¢¢¢¢¢¢¢¢£££££	602773607777600	BOV_1	5
3573	SB1145	¢¢£££££¢£¢¢¢¢¢¢£¢¢¢¢£¢¢¢¢££££¢¢¢¢¢¢¢¢¢£££££	602773674177600	BOV_1	17
	SB1977	¢¢£££££¢£¢¢¢¢¢¢£¢¢¢¢£¢¢¢¢¢¢¢¢¢¢¢¢¢¢¢£¢£££££	602773677777200	BOV_1	1
3591	SB1388	¢¢£££££¢£¢¢¢¢¢¢£¢¢¢¢£¢¢¢¢¢¢¢¢¢¢¢¢¢¢¢¢¢£££££	602773677777600	BOV_1	14
	SB1901	¢¢£££££¢£¢¢¢¢¢¢£¢¢¢¢¢£££¢¢¢¢¢¢¢¢¢¢¢¢¢¢£££££	602773707777600	BOV_1	1
3453	SB1176	¢¢£££££¢£¢¢¢¢¢¢£¢¢¢¢¢¢¢£££¢££££££££££¢£££££	602773761000200	BOV_1	62
	SB1488	¢¢£££££¢£¢¢¢¢¢¢£¢¢¢¢¢¢¢¢¢££¢¢¢¢¢¢¢¢¢¢¢£££££	602773774777600	BOV_1	1
		¢¢£££££¢£¢¢¢¢¢¢£¢¢¢¢¢¢¢¢¢¢£££££££££££¢£££££	602773776000200	BOV_1	1
3758	SB1434	¢¢£££££¢£¢¢¢¢¢¢£¢¢¢¢¢¢¢¢¢¢££¢£¢¢¢¢¢¢¢¢£££££	602773776277600	BOV_1	2
3757	SB1429	¢¢£££££¢£¢¢¢¢¢¢£¢¢¢¢¢¢¢¢¢¢¢¢¢£¢¢¢¢¢¢¢¢£££££	602773777677600	BOV_1	2
	SB1489	¢¢£££££¢£¢¢¢¢¢¢£¢¢¢¢¢¢¢¢¢¢¢¢¢¢¢£¢£¢¢¢¢£££££	602773777753600	BOV_1	1
	SB1584	¢¢£££££¢£¢¢¢¢¢¢£¢¢¢¢¢¢¢¢¢¢¢¢¢¢¢¢¢£¢¢£¢£££££	602773777773200	BOV_1	1
3750	SB1942	¢¢£££££¢£¢¢¢¢¢¢£¢¢¢¢¢¢¢¢¢¢¢¢¢¢¢¢¢¢££¢¢£££££	602773777774600	BOV_1	2
3630	SB1394	¢¢£££££¢£¢¢¢¢¢¢£¢¢¢¢¢¢¢¢¢¢¢¢¢¢¢¢¢¢£¢¢££££££	602773777775400	BOV_1	7
3562	SB0933	¢¢£££££¢£¢¢¢¢¢¢£¢¢¢¢¢¢¢¢¢¢¢¢¢¢¢¢¢¢¢¢¢££££££	602773777777400	BOV_1	20
661	SB0133	¢¢£££££¢£¢¢¢¢¢¢£¢¢¢¢¢¢¢¢¢¢¢¢¢¢¢¢¢¢¢¢¢¢£££££	602773777777600	BOV_1	58
	SB0990	¢¢££££¢£££££¢¢¢£¢¢¢¢¢¢¢¢¢¢¢¢¢¢¢¢¢¢¢¢¢¢£££££	604073777777600	BOV	1
3600	SB1652	¢¢££££¢¢£¢£¢¢¢¢£¢¢¢¢¢¢¢¢¢¢¢¢¢¢¢¢¢¢¢¢¢¢£££££	606573777777600	BOV_1	6
	SB0910	¢¢££££¢¢£¢¢£¢¢¢£¢¢¢¢¢¢¢¢¢¢¢¢¢¢¢¢¢¢¢¢¢¢£££££	606673777777600	BOV_1	1
	SB1684	¢¢££££¢¢£¢¢¢¢¢££¢¢¢¢£¢¢¢¢¢¢¢¢¢¢¢¢¢¢¢¢¢£££££	606763677777600	BOV	1
	SB2000	¢¢££££¢¢£¢¢¢¢¢¢£¢¢¢¢£¢¢¢¢££££¢¢¢¢¢¢¢¢¢£££££	606773674177600	BOV_1	1
985	SB0862	¢¢££££¢¢£¢¢¢¢¢¢£¢¢¢¢£¢¢¢¢¢¢¢¢¢¢££¢¢¢¢¢£££££	606773677747600	BOV_1	4
3512	SB0135	¢¢££££¢¢£¢¢¢¢¢¢£¢¢¢¢£¢¢¢¢¢¢¢¢¢¢¢¢¢¢¢¢¢£££££	606773677777600	BOV_1	107
	SB0908	¢¢££££¢¢£¢¢¢¢¢¢£¢¢¢¢¢¢¢¢¢¢¢¢¢¢¢¢¢¢£¢¢¢£££££	606773777775600	BOV_1	1
986	SB0885	¢¢££££¢¢£¢¢¢¢¢¢£¢¢¢¢¢¢¢¢¢¢¢¢¢¢¢¢¢¢¢¢¢¢£££££	606773777777600	BOV_1	7
	SB1155	¢¢£££¢££££¢¢¢¢¢£¢¢¢¢¢¢¢¢¢¢¢¢¢¢¢¢¢¢¢¢¢¢£££££	610373777777600	BOV	1
	SB1291	¢¢£££¢£¢£¢¢¢¢¢¢£¢¢¢¢£¢¢¢¢¢¢¢¢¢¢¢¢¢¢¢¢¢£££££	612773677777600	BOV_1	1
3593	SB0916	¢¢£££¢£¢£¢¢¢¢¢¢£¢¢¢¢¢¢¢¢¢¢¢¢¢¢¢¢¢¢¢¢¢¢£££££	612773777777600	BOV_1	7
		¢¢£££¢¢££££££££££¢¢¢¢¢¢¢¢¢¢¢¢£¢¢¢¢¢¢¢¢£££££	614001777677600	BOV	1
	SB1540	¢¢£££¢¢£££££££££¢¢¢¢¢¢¢¢¢¢¢¢¢¢¢¢¢¢¢¢¢¢£££££	614003777777600	BOV	1
	SB1539	¢¢£££¢¢££££££¢££¢¢¢¢¢¢¢¢¢¢¢¢¢¢¢¢¢¢¢¢¢¢£££££	614023777777600	BOV	1
	SB0903	¢¢£££¢¢£££££¢¢¢£¢¢¢¢££££¢¢¢¢¢¢¢¢¢¢¢¢¢¢£££££	614073607777600	BOV	1
	SB0947	¢¢£££¢¢£££££¢¢¢£¢¢¢¢¢¢¢¢¢¢£££££¢¢¢¢¢¢¢£££££	614073776037600	BOV	1
	SB0940	¢¢£££¢¢£££££¢¢¢£¢¢¢¢¢¢¢¢¢¢¢¢¢¢£¢¢¢¢¢¢¢£££££	614073777737600	BOV	1
662	SB0128	¢¢£££¢¢£££££¢¢¢£¢¢¢¢¢¢¢¢¢¢¢¢¢¢¢¢¢¢¢¢¢¢£££££	614073777777600	BOV	31
1442		¢¢£££¢¢£££££¢¢¢¢¢¢¢¢¢¢¢¢¢¢¢¢¢¢¢¢¢¢¢¢¢¢£££££	614077777777600	BOV	6
	SB1938	¢¢£££¢¢££££¢¢¢¢£¢¢¢¢¢¢¢¢¢¢££££££££¢¢£¢£££££	614173776003200	BOV	1
987	SB0888	¢¢£££¢¢££££¢¢¢¢£¢¢¢¢¢¢¢¢¢¢¢¢¢¢¢¢¢¢¢¢¢¢£££££	614173777777600	BOV	4
	SB1156	¢¢£££¢¢£££¢¢¢££££¢¢¢¢¢¢¢¢¢¢¢¢¢¢¢¢¢¢¢¢¢£££££	614341777777600	BOV	1
		¢¢£££¢¢£££¢¢¢¢££¢¢¢¢£¢¢¢¢¢¢¢¢¢¢¢¢¢¢¢¢¢£££££	614363677777600	BOV	1
	SB1158	¢¢£££¢¢£££¢¢¢¢££¢¢¢¢¢¢¢¢¢¢¢¢¢¢¢¢£££¢¢¢£££££	614363777761600	BOV	1
	SB1154	¢¢£££¢¢£££¢¢¢¢££¢¢¢¢¢¢¢¢¢¢¢¢¢¢¢¢£¢¢¢¢¢£££££	614363777767600	BOV	1
		¢¢£££¢¢£££¢¢¢¢££¢¢¢¢¢¢¢¢¢¢¢¢¢¢¢¢¢¢¢£¢¢£££££	614363777776600	BOV	1
	SB1159	¢¢£££¢¢£££¢¢¢¢££¢¢¢¢¢¢¢¢¢¢¢¢¢¢¢¢¢¢¢¢£¢£££££	614363777777200	BOV	1
2729	SB1161	¢¢£££¢¢£££¢¢¢¢££¢¢¢¢¢¢¢¢¢¢¢¢¢¢¢¢¢¢¢¢¢¢£££££	614363777777600	BOV	41
	SB1157	¢¢£££¢¢£££¢¢¢¢¢£¢¢¢¢¢¢¢¢¢¢¢¢¢¢£¢¢¢¢¢¢¢£££££	614373777737600	BOV	1
	SB1160	¢¢£££¢¢£££¢¢¢¢¢£¢¢¢¢¢¢¢¢¢¢¢¢¢¢¢¢¢¢££¢¢£££££	614373777774600	BOV	1
1673	SB0136	¢¢£££¢¢£££¢¢¢¢¢£¢¢¢¢¢¢¢¢¢¢¢¢¢¢¢¢¢¢¢¢¢¢£££££	614373777777600	BOV	42
	SB0929	¢¢£££¢¢££¢¢¢¢¢¢£¢£¢¢¢¢¢¢¢¢¢¢¢¢¢¢¢¢¢¢¢¢£££££	614772777777600	BOV	1
3555	SB1585	¢¢£££¢¢££¢¢¢¢¢¢£¢¢¢¢¢¢¢¢¢¢¢¢¢¢¢¢¢¢¢¢¢¢£££££	614773777777600	BOV	17
	SB1175	¢¢£££¢¢¢££££££££££££££££¢¢£¢¢¢¢¢¢¢¢¢¢¢£££££	616000006777600	BOV	1
		¢¢£££¢¢¢£££¢¢¢££¢¢¢¢¢¢¢¢¢¢¢¢¢¢¢¢¢¢¢£¢¢£££££	616163777776600	BOV	1
	SB1542	¢¢£££¢¢¢£££¢¢¢¢£¢¢¢¢¢¢¢¢¢¢¢¢¢¢¢¢¢¢¢¢¢¢£££££	616173777777600	BOV	1
3664	SB1074	¢¢£££¢¢¢££¢¢¢£££¢¢¢¢¢¢¢¢¢¢¢¢¢¢¢¢¢¢¢¢¢¢£££££	616343777777600	BOV	2
3665	SB1075	¢¢£££¢¢¢£¢££¢¢¢£¢¢¢¢¢¢¢¢¢¢¢¢¢¢¢¢¢¢¢¢¢¢£££££	616473777777600	BOV_1	3
	SB1450	¢¢£££¢¢¢£¢¢££££££££££££££¢££££££¢¢¢¢¢¢£££££	616600002017600	BOV	1
988	SB0884	¢¢£££¢¢¢£¢¢££££££¢¢¢¢¢¢¢¢¢¢¢¢¢¢¢¢¢¢¢¢¢£££££	616601777777600	BOV	4
	SB0901	¢¢£££¢¢¢£¢¢£¢¢¢£¢¢¢¢¢¢¢¢¢¢¢¢¢¢¢¢¢¢¢¢¢¢£££££	616673777777600	BOV_1	1
989	SB0868	¢¢£££¢¢¢£¢¢¢£¢¢£¢¢¢¢¢¢¢¢¢¢¢¢¢¢¢¢¢¢¢¢¢¢£££££	616733777777600	BOV_1	9
3696	SB1678	¢¢£££¢¢¢£¢¢¢¢£££££££££££¢£££¢¢¢¢¢¢¢¢¢¢£££££	616740004377600	BOV	2
	SB0342	¢¢£££¢¢¢£¢¢¢¢£££¢¢¢¢¢¢¢¢¢¢¢¢¢¢¢¢££¢¢¢¢£££££	616743777763600	BOV	1
3613	SB1377	¢¢£££¢¢¢£¢¢¢¢£¢£¢¢¢¢¢¢¢¢¢¢¢¢¢¢¢¢¢¢¢¢¢¢£££££	616753777777600	BOV_1	5
		¢¢£££¢¢¢£¢¢¢¢¢££¢¢¢¢£¢¢¢¢¢¢¢¢¢¢¢¢¢¢¢¢¢£££££	616763677777600	BOV	1
3847	SB1449	¢¢£££¢¢¢£¢¢¢¢¢££¢¢¢¢¢¢£¢¢¢¢¢£¢¢¢¢¢¢¢¢¢£££££	616763757577600	BOV	2
	SB1390	¢¢£££¢¢¢£¢¢¢¢¢££¢¢¢¢¢¢¢¢¢£££¢¢¢¢¢¢¢¢¢¢£££££	616763774377600	BOV	1
3574	SB1315	¢¢£££¢¢¢£¢¢¢¢¢££¢¢¢¢¢¢¢¢¢¢¢£££¢¢¢¢¢¢¢¢£££££	616763777077600	BOV	11
3686	SB1399	¢¢£££¢¢¢£¢¢¢¢¢££¢¢¢¢¢¢¢¢¢¢¢¢¢¢¢¢¢¢££¢¢£££££	616763777774600	BOV	2
		¢¢£££¢¢¢£¢¢¢¢¢££¢¢¢¢¢¢¢¢¢¢¢¢¢¢¢¢¢¢¢¢£¢£££££	616763777777200	BOV	1
3508	SB1265	¢¢£££¢¢¢£¢¢¢¢¢££¢¢¢¢¢¢¢¢¢¢¢¢¢¢¢¢¢¢¢¢¢¢£££££	616763777777600	BOV	137
	SB0945	¢¢£££¢¢¢£¢¢¢¢¢¢££¢¢¢¢¢¢¢¢¢¢¢¢¢¢¢¢¢¢¢¢¢£££££	616771777777600	BOV	1
	SB0926	¢¢£££¢¢¢£¢¢¢¢¢¢£¢£¢¢¢¢¢¢¢¢££¢¢¢¢¢¢¢¢¢¢£££££	616772776377600	BOV_1	1
		¢¢£££¢¢¢£¢¢¢¢¢¢£¢£¢¢¢¢¢¢¢¢¢¢¢£¢¢¢¢¢¢¢¢£££££	616772777677600	BOV_1	1
990	SB0824	¢¢£££¢¢¢£¢¢¢¢¢¢£¢£¢¢¢¢¢¢¢¢¢¢¢¢¢¢¢¢¢¢¢¢£££££	616772777777600	BOV_1	21
		¢¢£££¢¢¢£¢¢¢¢¢¢£¢¢££££¢¢¢¢¢¢¢¢¢¢¢¢¢¢¢¢£££££	616773037777600	BOV_1	1
3691	SB1657	¢¢£££¢¢¢£¢¢¢¢¢¢£¢¢£¢¢¢¢¢¢¢¢¢¢¢££¢¢¢¢¢¢£££££	616773377717600	BOV_1	2
	SB1448	¢¢£££¢¢¢£¢¢¢¢¢¢£¢¢¢££££££¢£££££££££££££££££	616773402000000	BOV_1	1
	SB0519	¢¢£££¢¢¢£¢¢¢¢¢¢£¢¢¢¢£¢¢¢¢¢¢¢¢£¢¢¢¢¢¢¢¢£££££	616773677677600	BOV_1	1
3545	SB1632	¢¢£££¢¢¢£¢¢¢¢¢¢£¢¢¢¢£¢¢¢¢¢¢¢¢¢¢¢¢¢¢¢£¢£££££	616773677777200	BOV_1	22
663	SB0426	¢¢£££¢¢¢£¢¢¢¢¢¢£¢¢¢¢£¢¢¢¢¢¢¢¢¢¢¢¢¢¢¢¢¢£££££	616773677777600	BOV_1	49
991	SB0089	¢¢£££¢¢¢£¢¢¢¢¢¢£¢¢¢¢¢£¢¢¢¢¢¢¢¢¢¢¢¢¢¢¢¢£££££	616773737777600	BOV_1	30
3683	SB1386	¢¢£££¢¢¢£¢¢¢¢¢¢£¢¢¢¢¢¢¢¢¢£££££££¢¢¢¢¢¢£££££	616773774017600	BOV_1	2
3568	SB1322	¢¢£££¢¢¢£¢¢¢¢¢¢£¢¢¢¢¢¢¢¢¢££££££¢¢¢¢¢¢¢£££££	616773774037600	BOV_1	14
3595	SB1327	¢¢£££¢¢¢£¢¢¢¢¢¢£¢¢¢¢¢¢¢¢¢£££¢¢¢¢¢¢¢¢¢¢£££££	616773774377600	BOV_1	6
		¢¢£££¢¢¢£¢¢¢¢¢¢£¢¢¢¢¢¢¢¢¢££¢¢¢¢¢¢¢¢¢¢¢£££££	616773774777600	BOV_1	1
3759	SB0991	¢¢£££¢¢¢£¢¢¢¢¢¢£¢¢¢¢¢¢¢¢¢£¢¢¢¢¢¢¢¢¢¢¢¢£££££	616773775777600	BOV_1	2
	SB1655	¢¢£££¢¢¢£¢¢¢¢¢¢£¢¢¢¢¢¢¢¢¢¢£££££¢¢¢¢¢¢¢£££££	616773776037600	BOV_1	1
	SB0931	¢¢£££¢¢¢£¢¢¢¢¢¢£¢¢¢¢¢¢¢¢¢¢£££¢¢¢££¢¢¢¢£££££	616773776163600	BOV_1	1
664	SB0331	¢¢£££¢¢¢£¢¢¢¢¢¢£¢¢¢¢¢¢¢¢¢¢££¢¢¢¢¢¢¢¢¢¢£££££	616773776377600	BOV_1	3
	SB1447	¢¢£££¢¢¢£¢¢¢¢¢¢£¢¢¢¢¢¢¢¢¢¢£¢¢¢¢¢¢¢£¢¢¢£££££	616773776775600	BOV_1	1
3565	SB1658	¢¢£££¢¢¢£¢¢¢¢¢¢£¢¢¢¢¢¢¢¢¢¢¢££££££££¢¢¢£££££	616773777001600	BOV_1	14
		¢¢£££¢¢¢£¢¢¢¢¢¢£¢¢¢¢¢¢¢¢¢¢¢£££¢¢££¢¢¢¢£££££	616773777063600	BOV_1	1
3519	SB1299	¢¢£££¢¢¢£¢¢¢¢¢¢£¢¢¢¢¢¢¢¢¢¢¢£££¢¢¢¢¢¢¢¢£££££	616773777077600	BOV_1	49
	SB1773	¢¢£££¢¢¢£¢¢¢¢¢¢£¢¢¢¢¢¢¢¢¢¢¢££¢¢¢¢¢¢¢£¢£££££	616773777177200	BOV_1	1
3657	SB1874	¢¢£££¢¢¢£¢¢¢¢¢¢£¢¢¢¢¢¢¢¢¢¢¢££¢¢¢¢¢¢¢¢¢£££££	616773777177600	BOV_1	3
	SB0915	¢¢£££¢¢¢£¢¢¢¢¢¢£¢¢¢¢¢¢¢¢¢¢¢¢£££¢¢¢¢¢£¢£££££	616773777437200	BOV_1	1
	SB0902	¢¢£££¢¢¢£¢¢¢¢¢¢£¢¢¢¢¢¢¢¢¢¢¢¢£¢¢¢¢£££¢¢£££££	616773777570600	BOV_1	1
992	SB0893	¢¢£££¢¢¢£¢¢¢¢¢¢£¢¢¢¢¢¢¢¢¢¢¢¢¢£¢¢¢¢¢¢¢¢£££££	616773777677600	BOV_1	2
3669	SB1234	¢¢£££¢¢¢£¢¢¢¢¢¢£¢¢¢¢¢¢¢¢¢¢¢¢¢¢££££¢¢¢¢£££££	616773777703600	BOV_1	2
993	SB0864	¢¢£££¢¢¢£¢¢¢¢¢¢£¢¢¢¢¢¢¢¢¢¢¢¢¢¢¢£¢¢¢¢¢¢£££££	616773777757600	BOV_1	6
994	SB0890	¢¢£££¢¢¢£¢¢¢¢¢¢£¢¢¢¢¢¢¢¢¢¢¢¢¢¢¢¢££¢¢¢¢£££££	616773777763600	BOV_1	3
	SB0137	¢¢£££¢¢¢£¢¢¢¢¢¢£¢¢¢¢¢¢¢¢¢¢¢¢¢¢¢¢¢££¢¢¢£££££	616773777771600	BOV_1	1
3646	SB1376	¢¢£££¢¢¢£¢¢¢¢¢¢£¢¢¢¢¢¢¢¢¢¢¢¢¢¢¢¢¢£¢¢¢¢£££££	616773777773600	BOV_1	3
3572	SB1398	¢¢£££¢¢¢£¢¢¢¢¢¢£¢¢¢¢¢¢¢¢¢¢¢¢¢¢¢¢¢¢££¢¢£££££	616773777774600	BOV_1	13
995	SB0855	¢¢£££¢¢¢£¢¢¢¢¢¢£¢¢¢¢¢¢¢¢¢¢¢¢¢¢¢¢¢¢£¢¢¢£££££	616773777775600	BOV_1	15
	SB0330	¢¢£££¢¢¢£¢¢¢¢¢¢£¢¢¢¢¢¢¢¢¢¢¢¢¢¢¢¢¢¢¢¢£££££££	616773777777000	BOV_1	1
1667	SB1055	¢¢£££¢¢¢£¢¢¢¢¢¢£¢¢¢¢¢¢¢¢¢¢¢¢¢¢¢¢¢¢¢¢£¢£££££	616773777777200	BOV_1	9
3615	SB1639	¢¢£££¢¢¢£¢¢¢¢¢¢£¢¢¢¢¢¢¢¢¢¢¢¢¢¢¢¢¢¢¢¢¢££££££	616773777777400	BOV_1	5
665	SB0134	¢¢£££¢¢¢£¢¢¢¢¢¢£¢¢¢¢¢¢¢¢¢¢¢¢¢¢¢¢¢¢¢¢¢¢£££££	616773777777600	BOV_1	2057
		¢¢£££¢¢¢£¢¢¢¢¢¢¢¢¢¢¢£££¢¢¢¢¢¢¢¢¢¢¢¢¢¢¢£££££	616777617777600	BOV	1
416		¢¢£££¢¢¢£¢¢¢¢¢¢¢¢¢¢¢£¢¢¢¢¢¢¢¢¢¢¢¢¢¢¢¢¢£££££	616777677777600	BOV	7
1443		¢¢£££¢¢¢£¢¢¢¢¢¢¢¢¢¢¢¢¢¢¢¢¢¢¢¢¢¢¢¢¢¢¢¢¢£££££	616777777777600	BOV	2
		¢¢££¢£¢££££££¢¢£¢¢¢¢¢¢¢¢¢¢¢¢¢¢¢¢¢¢¢¢¢¢£££££	624033777777600	BOV	1
1859	SB0987	¢¢££¢£¢£££££¢¢¢£¢¢¢¢¢¢¢¢¢¢¢¢¢¢££££££¢¢£££££	624073777700600	BOV	3
1303	SB0054	¢¢££¢£¢£££££¢¢¢£¢¢¢¢¢¢¢¢¢¢¢¢¢¢¢¢¢¢¢¢¢¢£££££	624073777777600	BOV	4
	SB1297	¢¢££¢¢¢££¢£¢¢£¢£¢¢¢¢¢¢¢¢¢¢¢¢¢¢¢¢¢¢¢¢¢¢£££££	634553777777600	BOV	1
996	SB2213	¢¢££¢¢¢¢££¢¢¢¢¢£¢¢¢¢£¢¢¢¢¢¢¢¢¢¢¢¢¢¢¢¢¢£££££	636373677777600	BOV	2
	SB1964	¢¢££¢¢¢¢£¢£¢¢¢¢£¢¢¢¢££¢¢¢¢¢¢¢¢¢¢¢¢¢¢¢¢£££££	636573637777600	BOV_1	1
	SB1292	¢¢££¢¢¢¢£¢£¢¢¢¢£¢¢¢¢£¢¢¢¢¢¢¢¢¢¢¢¢¢¢¢¢¢£££££	636573677777600	BOV_1	1
3514	SB1019	¢¢££¢¢¢¢£¢£¢¢¢¢£¢¢¢¢¢¢¢¢¢¢¢¢¢¢¢¢¢¢¢¢¢¢£££££	636573777777600	BOV_1	77
	SB1274	¢¢££¢¢¢¢£¢¢¢£¢££¢¢¢¢¢¢¢¢¢¢¢¢¢¢¢¢¢¢¢¢¢¢£££££	636723777777600	BOV	1
	SB1233	¢¢££¢¢¢¢£¢¢¢£¢¢£¢¢¢¢¢¢¢¢¢¢¢¢¢¢¢£¢¢¢¢¢¢£££££	636733777757600	BOV_1	1
3520	SB1174	¢¢££¢¢¢¢£¢¢¢£¢¢£¢¢¢¢¢¢¢¢¢¢¢¢¢¢¢¢¢¢££¢¢£££££	636733777774600	BOV_1	49
3507	SB1232	¢¢££¢¢¢¢£¢¢¢£¢¢£¢¢¢¢¢¢¢¢¢¢¢¢¢¢¢¢¢¢¢¢¢¢£££££	636733777777600	BOV_1	154
		¢¢££¢¢¢¢£¢¢¢¢¢££¢¢¢¢£¢¢¢¢¢¢¢¢¢¢¢¢¢¢¢¢¢£££££	636763677777600	BOV	1
	SB1894	¢¢££¢¢¢¢£¢¢¢¢¢¢£¢¢£¢¢¢¢¢¢¢¢¢¢¢¢£¢¢¢¢¢¢£££££	636773377757600	BOV_1	1
3611	SB1367	¢¢££¢¢¢¢£¢¢¢¢¢¢£¢¢¢¢£¢¢¢¢££££¢¢¢¢¢¢¢¢¢£££££	636773674177600	BOV_1	5
3560	SB1296	¢¢££¢¢¢¢£¢¢¢¢¢¢£¢¢¢¢£¢¢¢¢¢££¢¢¢¢¢¢¢¢¢¢£££££	636773676377600	BOV_1	15
3659	SB1966	¢¢££¢¢¢¢£¢¢¢¢¢¢£¢¢¢¢£¢¢¢¢¢¢¢¢¢¢¢¢¢¢¢£¢£££££	636773677777200	BOV_1	3
2141	SB1093	¢¢££¢¢¢¢£¢¢¢¢¢¢£¢¢¢¢£¢¢¢¢¢¢¢¢¢¢¢¢¢¢¢¢¢£££££	636773677777600	BOV_1	13
3724	SB1104	¢¢££¢¢¢¢£¢¢¢¢¢¢£¢¢¢¢¢¢¢¢¢¢¢¢¢£¢¢¢¢¢¢¢¢£££££	636773777677600	BOV_1	2
		¢¢££¢¢¢¢£¢¢¢¢¢¢£¢¢¢¢¢¢¢¢¢¢¢¢¢¢¢£££¢¢¢¢£££££	636773777743600	BOV_1	1
3676	SB1314	¢¢££¢¢¢¢£¢¢¢¢¢¢£¢¢¢¢¢¢¢¢¢¢¢¢¢¢¢¢¢¢££¢¢£££££	636773777774600	BOV_1	2
997	SB0822	¢¢££¢¢¢¢£¢¢¢¢¢¢£¢¢¢¢¢¢¢¢¢¢¢¢¢¢¢¢¢¢¢¢¢¢£££££	636773777777600	BOV_1	44
1862	SB0975	¢¢£¢££££££££££££££££££¢¢¢¢¢¢¢¢¢¢¢¢¢¢¢¢£££££	640000037777600	BOV	5
		¢¢£¢££££££££££££¢¢¢¢¢£¢¢¢¢¢¢¢¢¢¢¢¢¢¢¢¢£££££	640003737777600	BOV	1
		¢¢£¢££££££££££££¢¢¢¢¢¢¢¢¢¢¢¢¢¢¢£¢¢¢¢¢¢£££££	640003777757600	BOV	1
829	SB0663	¢¢£¢££££££££££££¢¢¢¢¢¢¢¢¢¢¢¢¢¢¢¢¢¢¢¢¢¢£££££	640003777777600	BOV	8
	SB1495	¢¢£¢££££££££££¢£¢££££££¢¢¢¢¢¢¢¢¢¢¢¢¢¢¢£££££	640012017777600	BOV_3	1
1158	SB1040	¢¢£¢££££££££££¢£¢¢£¢¢¢¢¢¢¢¢¢¢¢¢¢¢¢¢¢¢¢£££££	640013377777600	BOV_3	19
		¢¢£¢££££££££££¢£¢¢¢¢£¢¢¢¢¢¢¢¢¢¢¢¢¢¢¢¢¢£££££	640013677777600	BOV_3	1
1304	SB0664	¢¢£¢££££££££££¢£¢¢¢¢¢£¢¢¢¢¢¢¢¢¢¢¢¢¢¢¢¢£££££	640013737777600	BOV_3	2
	SB1759	¢¢£¢££££££££££¢£¢¢¢¢¢¢¢¢¢¢££¢¢¢¢¢¢¢¢¢¢£££££	640013776377600	BOV_3	1
1846	SB0292	¢¢£¢££££££££££¢£¢¢¢¢¢¢¢¢¢¢£¢¢¢¢¢¢¢¢¢¢¢£££££	640013776777600	BOV_3	3
666	SB0266	¢¢£¢££££££££££¢£¢¢¢¢¢¢¢¢¢¢¢££¢¢¢¢¢¢¢¢¢£££££	640013777177600	BOV_3	8
1818	SB1039	¢¢£¢££££££££££¢£¢¢¢¢¢¢¢¢¢¢¢¢¢¢¢¢££¢¢¢¢£££££	640013777763600	BOV_3	2
	SB1526	¢¢£¢££££££££££¢£¢¢¢¢¢¢¢¢¢¢¢¢¢¢¢¢¢¢¢£¢¢£££££	640013777776600	BOV_3	1
479	SB0145	¢¢£¢££££££££££¢£¢¢¢¢¢¢¢¢¢¢¢¢¢¢¢¢¢¢¢¢¢¢£££££	640013777777600	BOV_3	126
	SB1212	¢¢£¢£££££££££¢££¢¢¢¢¢¢¢¢¢¢¢¢¢¢¢¢¢¢£¢¢¢£££££	640023777775600	BOV	1
	SB1496	¢¢£¢£££££££££¢££¢¢¢¢¢¢¢¢¢¢¢¢¢¢¢¢¢¢¢¢¢¢£££££	640023777777600	BOV	1
	SB1213	¢¢£¢£££££££££¢¢£¢¢£¢¢¢¢¢¢¢¢¢¢¢¢¢¢¢¢¢¢¢£££££	640033377777600	BOV	1
	SB1497	¢¢£¢£££££££££¢¢£¢¢¢¢¢¢¢¢¢¢¢¢¢¢¢¢¢¢¢£¢¢£££££	640033777776600	BOV	1
	SB1165	¢¢£¢£££££££££¢¢£¢¢¢¢¢¢¢¢¢¢¢¢¢¢¢¢¢¢¢¢¢¢£££££	640033777777600	BOV	1
	SB0976	¢¢£¢££££££££¢¢¢£¢¢¢¢¢¢¢¢¢££££££¢¢¢¢¢¢¢£££££	640073774037600	BOV	1
	SB1738	¢¢£¢££££££¢£££££¢¢¢¢¢¢¢¢¢¢¢¢¢¢¢¢¢¢¢¢¢¢£££££	640203777777600	BOV	1
	SB1400	¢¢£¢£££££¢¢¢¢¢¢£¢¢¢¢£¢¢¢¢¢¢¢¢¢¢¢¢¢¢¢¢¢£££££	640773677777600	BOV	1
		¢¢£¢£££¢££¢££££¢¢¢¢¢¢¢¢¢¢¢¢¢¢¢¢¢¢¢¢¢¢¢£££££	642207777777600	BOV	1
1298		¢¢£¢£££¢££¢£££¢¢¢¢¢¢¢¢¢¢¢¢¢¢¢¢¢¢¢¢¢¢¢¢£££££	642217777777600	BOV	2
	SB1041	¢¢£¢£££¢£¢£¢£££££¢¢¢¢¢¢¢¢¢¢££¢¢¢¢¢¢¢¢¢£££££	642501777177600	BOV	1
2988		¢¢£¢£££¢£¢£¢¢¢¢£¢¢¢¢¢¢¢¢¢¢¢¢¢¢¢¢¢¢¢¢¢¢£££££	642573777777600	BOV_1	2
	SB1664	¢¢£¢£££¢£¢¢¢¢¢¢£¢¢¢¢£¢¢¢¢¢¢¢¢¢¢¢¢¢¢¢£¢£££££	642773677777200	BOV_1	1
	SB2271	¢¢£¢£££¢£¢¢¢¢¢¢£¢¢¢¢£¢¢¢¢¢¢¢¢¢¢¢¢¢¢¢¢¢£££££	642773677777600	BOV_1	1
	SB1739	¢¢£¢££¢£££££¢£££¢¢¢¢¢¢¢¢¢¢¢¢¢¢¢¢¢¢¢¢¢¢£££££	644043777777600	BOV	1
	SB1500	¢¢£¢££¢£££££¢¢££¢¢¢¢¢¢¢¢¢¢¢¢¢¢££££££¢¢£££££	644063777700600	BOV	1
3652	SB1662	¢¢£¢££¢£££££¢¢££¢¢¢¢¢¢¢¢¢¢¢¢¢¢¢££¢¢¢¢¢£££££	644063777747600	BOV	3
	SB1498	¢¢£¢££¢£££££¢¢££¢¢¢¢¢¢¢¢¢¢¢¢¢¢¢¢¢¢¢¢¢¢£££££	644063777777600	BOV	1
	SB1781	¢¢£¢££¢£££££¢¢¢£¢¢¢¢¢¢¢¢¢¢¢¢¢£¢¢¢¢¢¢¢¢£££££	644073777677600	BOV	1
3682	SB1366	¢¢£¢££¢£££££¢¢¢£¢¢¢¢¢¢¢¢¢¢¢¢¢¢¢££¢¢¢¢¢£££££	644073777747600	BOV	2
667	SB0141	¢¢£¢££¢£££££¢¢¢£¢¢¢¢¢¢¢¢¢¢¢¢¢¢¢¢¢¢¢¢¢¢£££££	644073777777600	BOV	22
998	SB0891	¢¢£¢££¢££¢¢¢¢¢¢£¢¢¢¢¢¢¢¢¢¢¢¢¢¢¢¢£¢¢¢¢¢£££££	644773777767600	BOV	2
2456		¢¢£¢££¢¢£¢£¢¢¢¢£¢¢¢¢¢¢¢¢¢¢¢¢¢¢¢¢¢¢¢¢¢¢£££££	646573777777600	BOV_1	2
3689	SB1640	¢¢£¢££¢¢£¢¢¢¢¢££¢££££¢¢¢¢¢¢¢¢¢¢¢¢¢¢¢¢¢£££££	646762077777600	BOV	2
3670	SB1281	¢¢£¢££¢¢£¢¢¢¢¢££¢¢¢¢¢¢¢¢¢¢¢¢¢¢¢¢£¢¢¢¢¢£££££	646763777767600	BOV	2
		¢¢£¢££¢¢£¢¢¢¢¢££¢¢¢¢¢¢¢¢¢¢¢¢¢¢¢¢¢¢¢¢¢¢£££££	646763777777600	BOV	1
999	SB0821	¢¢£¢££¢¢£¢¢¢¢¢¢££££££¢¢¢¢¢¢¢¢¢¢¢£¢¢¢¢¢£££££	646770077767600	BOV	22
3596	SB1373	¢¢£¢££¢¢£¢¢¢¢¢¢£¢££££¢¢¢¢¢¢¢¢¢¢¢¢¢¢¢¢¢£££££	646772077777600	BOV_1	6
1000	SB0823	¢¢£¢££¢¢£¢¢¢¢¢¢£¢¢¢¢¢¢¢¢¢¢£££¢¢¢£¢¢¢¢¢£££££	646773776167600	BOV_1	19
	SB1360	¢¢£¢££¢¢£¢¢¢¢¢¢£¢¢¢¢¢¢¢¢¢¢¢¢¢£¢¢£¢¢¢¢¢£££££	646773777667600	BOV_1	1
2840	SB1026	¢¢£¢££¢¢£¢¢¢¢¢¢£¢¢¢¢¢¢¢¢¢¢¢¢¢£¢¢¢¢¢¢¢¢£££££	646773777677600	BOV_1	3
2432	SB1309	¢¢£¢££¢¢£¢¢¢¢¢¢£¢¢¢¢¢¢¢¢¢¢¢¢¢¢££££££¢¢£££££	646773777700600	BOV_1	2
3609	SB1341	¢¢£¢££¢¢£¢¢¢¢¢¢£¢¢¢¢¢¢¢¢¢¢¢¢¢¢¢££££££¢£££££	646773777740200	BOV_1	5
1001	SB0851	¢¢£¢££¢¢£¢¢¢¢¢¢£¢¢¢¢¢¢¢¢¢¢¢¢¢¢¢¢£¢¢¢£¢£££££	646773777767200	BOV_1	4
1002	SB0832	¢¢£¢££¢¢£¢¢¢¢¢¢£¢¢¢¢¢¢¢¢¢¢¢¢¢¢¢¢£¢¢¢¢¢£££££	646773777767600	BOV_1	61
		¢¢£¢£¢¢£££¢¢¢£££¢¢¢¢£¢¢¢¢¢¢¢¢¢¢¢¢¢¢£¢¢£££££	654343677776600	BOV	1
	SB0302	¢¢£¢£¢¢££¢£¢¢¢¢£¢¢¢¢¢¢¢¢¢¢¢¢¢¢¢¢£¢¢¢¢¢£££££	654573777767600	BOV	1
	SB1056	¢¢£¢£¢¢££¢£¢¢¢¢£¢¢¢¢¢¢¢¢¢¢¢¢¢¢¢¢¢¢¢¢¢¢£££££	654573777777600	BOV	1
	SB1443	¢¢£¢£¢¢¢££¢¢¢£££¢¢¢¢¢¢¢¢¢¢£¢¢£¢¢¢¢¢¢¢¢£££££	656343776677600	BOV	1
		¢¢£¢£¢¢¢££¢¢¢£££¢¢¢¢¢¢¢¢¢¢¢¢¢£¢¢¢¢¢¢¢¢£££££	656343777677600	BOV	1
		¢¢£¢£¢¢¢£¢££¢¢¢£¢¢¢¢££¢¢¢¢¢¢¢¢¢¢¢¢¢¢¢¢£££££	656473637777600	BOV_1	1
668	SB0268	¢¢£¢£¢¢¢£¢££¢¢¢£¢¢¢¢¢£¢¢¢¢¢¢¢¢¢¢¢¢¢¢¢¢£££££	656473737777600	BOV_1	14
	SB1048	¢¢£¢£¢¢¢£¢££¢¢¢£¢¢¢¢¢¢¢¢¢¢¢¢¢¢¢£££¢¢¢¢£££££	656473777743600	BOV_1	1
		¢¢£¢£¢¢¢£¢£¢¢¢££¢¢£¢¢¢¢¢¢¢¢¢¢¢¢¢¢¢¢¢¢¢£££££	656563377777600	BOV	1
	SB1782	¢¢£¢£¢¢¢£¢£¢¢¢¢£¢¢£¢££¢¢¢¢¢¢¢¢¢¢¢¢¢¢£¢£££££	656573237777200	BOV_1	1
		¢¢£¢£¢¢¢£¢£¢¢¢¢£¢¢£¢£¢¢¢¢¢¢¢¢¢¢¢¢¢¢¢¢¢£££££	656573277777600	BOV_1	1
3858	SB1071	¢¢£¢£¢¢¢£¢£¢¢¢¢£¢¢£¢¢¢¢¢¢¢¢¢¢£££££¢¢¢¢£££££	656573377603600	BOV_1	10
669	SB0520	¢¢£¢£¢¢¢£¢£¢¢¢¢£¢¢£¢¢¢¢¢¢¢¢¢¢¢¢¢¢¢¢¢£¢£££££	656573377777200	BOV_1	14
670	SB0267	¢¢£¢£¢¢¢£¢£¢¢¢¢£¢¢£¢¢¢¢¢¢¢¢¢¢¢¢¢¢¢¢¢¢¢£££££	656573377777600	BOV_1	21
594	SB0131	¢¢£¢£¢¢¢£¢£¢¢¢¢£¢¢¢¢¢¢¢¢¢¢¢¢¢¢¢¢¢¢¢¢¢¢£££££	656573777777600	BOV_1	71
		¢¢£¢£¢¢¢£¢¢¢¢¢¢£¢£¢¢¢¢¢¢¢¢¢¢¢¢¢¢¢¢¢¢¢¢£££££	656772777777600	BOV_1	1
1989	SB1546	¢¢£¢£¢¢¢£¢¢¢¢¢¢£¢¢£¢¢¢¢¢¢¢¢¢¢¢¢¢¢¢¢¢¢¢£££££	656773377777600	BOV_1	2
	SB1393	¢¢£¢£¢¢¢£¢¢¢¢¢¢£¢¢¢¢£¢¢¢¢££££¢¢¢¢¢¢¢¢¢£££££	656773674177600	BOV_1	1
	SB1987	¢¢£¢£¢¢¢£¢¢¢¢¢¢£¢¢¢¢£¢¢¢¢¢¢¢¢¢¢¢¢¢¢¢£¢£££££	656773677777200	BOV_1	1
	SB1195	¢¢£¢£¢¢¢£¢¢¢¢¢¢£¢¢¢¢£¢¢¢¢¢¢¢¢¢¢¢¢¢¢¢¢¢£££££	656773677777600	BOV_1	1
	SB1100	¢¢£¢£¢¢¢£¢¢¢¢¢¢£¢¢¢¢¢¢¢¢¢¢¢¢¢£¢¢¢¢¢¢¢¢£££££	656773777677600	BOV_1	1
	SB1674	¢¢£¢£¢¢¢£¢¢¢¢¢¢£¢¢¢¢¢¢¢¢¢¢¢¢¢¢¢¢£¢¢¢¢¢£££££	656773777767600	BOV_1	1
1003	SB0849	¢¢£¢£¢¢¢£¢¢¢¢¢¢£¢¢¢¢¢¢¢¢¢¢¢¢¢¢¢¢¢¢¢¢¢¢£££££	656773777777600	BOV_1	20
3644	SB1353	¢¢£¢¢£££££££££££££££££££¢¢¢¢¢¢¢¢¢¢¢¢¢¢£££££	660000007777600	BOV	4
	SB1906	¢¢£¢¢££££££££¢¢£¢¢¢¢¢¢¢¢¢¢¢¢¢¢¢¢¢¢¢¢¢¢£££££	660033777777600	BOV	1
	SB1924	¢¢£¢¢£££££££¢¢¢£¢¢¢¢¢¢¢¢¢¢¢¢¢¢¢¢¢¢¢¢¢¢£££££	660073777777600	BOV	1
		¢¢£¢¢££¢££££¢£££¢¢¢¢¢¢¢¢¢¢¢¢¢¢¢¢¢¢¢££¢£££££	662043777776200	BOV	1
	SB0887	¢¢£¢¢££¢£¢¢¢¢¢££¢¢¢¢¢¢¢¢¢¢¢¢££££¢¢¢¢¢¢£££££	662763777417600	BOV	1
	SB1207	¢¢£¢¢££¢£¢¢¢¢¢££¢¢¢¢¢¢¢¢¢¢¢¢¢¢¢¢¢¢¢¢¢¢£££££	662763777777600	BOV	1
1682	SB0337	¢¢£¢¢££¢£¢¢¢¢¢¢£¢¢¢¢£¢¢¢¢¢¢¢¢¢¢¢¢¢¢¢¢¢£££££	662773677777600	BOV_1	11
	SB1206	¢¢£¢¢££¢£¢¢¢¢¢¢£¢¢¢¢¢¢¢¢¢¢¢¢££¢¢¢¢¢¢¢¢£££££	662773777477600	BOV_1	1
1004	SB0841	¢¢£¢¢££¢£¢¢¢¢¢¢£¢¢¢¢¢¢¢¢¢¢¢¢¢¢¢¢¢¢¢¢¢¢£££££	662773777777600	BOV_1	52
	SB1038	¢¢£¢¢£¢£££££££££££££¢¢¢¢¢¢¢¢¢¢¢¢¢¢¢¢¢¢£££££	664000177777600	BOV	1
	SB0974	¢¢£¢¢£¢££££££££££££¢¢¢¢¢¢¢¢¢¢¢¢¢¢¢¢¢¢¢£££££	664000377777600	BOV	1
	SB1042	¢¢£¢¢£¢£££££££££££¢¢¢¢¢¢¢¢¢¢¢¢¢¢¢¢¢¢¢¢£££££	664000777777600	BOV	1
2430	SB0486	¢¢£¢¢£¢£££££££¢£¢¢¢¢¢¢¢¢¢¢¢¢¢¢¢¢¢¢¢¢¢¢£££££	664013777777600	BOV	2
3859	SB0487	¢¢£¢¢£¢££££££¢¢££¢¢¢¢¢¢¢¢¢¢¢¢¢¢¢¢¢¢¢¢¢£££££	664031777777600	BOV	2
	SB0957	¢¢£¢¢£¢££££££¢¢£¢¢¢¢¢¢¢¢¢££££££¢¢¢¢¢¢¢£££££	664033774037600	BOV	1
3628	SB1374	¢¢£¢¢£¢££££££¢¢£¢¢¢¢¢¢¢¢¢¢¢¢¢¢¢££¢¢¢¢¢£££££	664033777747600	BOV	5
3857	SB1499	¢¢£¢¢£¢££££££¢¢£¢¢¢¢¢¢¢¢¢¢¢¢¢¢¢¢¢¢¢£¢¢£££££	664033777776600	BOV	2
2153	SB0980	¢¢£¢¢£¢££££££¢¢£¢¢¢¢¢¢¢¢¢¢¢¢¢¢¢¢¢¢¢¢¢¢£££££	664033777777600	BOV	13
	SB0307	¢¢£¢¢£¢£££££¢££££¢¢¢¢¢¢¢¢¢¢¢¢¢¢¢¢¢¢¢¢¢£££££	664041777777600	BOV	1
	SB0977	¢¢£¢¢£¢£££££¢£££¢¢¢¢¢¢¢¢¢££££££¢¢¢¢¢¢¢£££££	664043774037600	BOV	1
671	SB0290	¢¢£¢¢£¢£££££¢£££¢¢¢¢¢¢¢¢¢¢¢¢¢¢¢¢¢¢¢¢¢¢£££££	664043777777600	BOV	4
	SB0143	¢¢£¢¢£¢£££££¢£¢£¢¢¢¢¢¢¢¢¢¢¢¢¢¢¢¢¢¢£¢¢¢£££££	664053777775600	BOV	1
	SB1785	¢¢£¢¢£¢£££££¢¢££££¢¢¢¢¢£¢¢¢¢¢¢¢¢¢¢¢¢¢¢£££££	664060767777600	BOV	1
	SB1046	¢¢£¢¢£¢£££££¢¢£££¢¢¢¢¢¢¢¢¢¢¢¢¢¢¢¢¢¢¢¢¢£££££	664061777777600	BOV	1
	SB0665	¢¢£¢¢£¢£££££¢¢££¢¢£££¢¢¢¢¢¢¢¢¢¢¢¢¢¢¢¢¢£££££	664063077777600	BOV	1
	SB0670	¢¢£¢¢£¢£££££¢¢££¢¢£¢¢¢¢¢¢¢¢¢¢¢¢¢¢¢¢¢¢¢£££££	664063377777600	BOV	1
	SB0661	¢¢£¢¢£¢£££££¢¢££¢¢¢¢¢¢¢¢¢££££££¢¢¢¢¢¢¢£££££	664063774037600	BOV	1
1308	SB1116	¢¢£¢¢£¢£££££¢¢££¢¢¢¢¢¢¢¢¢¢¢¢¢¢££££££¢¢£££££	664063777700600	BOV	2
	SB1641	¢¢£¢¢£¢£££££¢¢££¢¢¢¢¢¢¢¢¢¢¢¢¢¢¢££¢¢¢¢¢£££££	664063777747600	BOV	1
3856	SB0671	¢¢£¢¢£¢£££££¢¢££¢¢¢¢¢¢¢¢¢¢¢¢¢¢¢£¢¢¢¢¢¢£££££	664063777757600	BOV	2
	SB0672	¢¢£¢¢£¢£££££¢¢££¢¢¢¢¢¢¢¢¢¢¢¢¢¢¢¢£¢¢¢¢¢£££££	664063777767600	BOV	1
		¢¢£¢¢£¢£££££¢¢££¢¢¢¢¢¢¢¢¢¢¢¢¢¢¢¢¢¢£¢¢¢£££££	664063777775600	BOV	1
1666	SB1122	¢¢£¢¢£¢£££££¢¢££¢¢¢¢¢¢¢¢¢¢¢¢¢¢¢¢¢¢¢£¢¢£££££	664063777776600	BOV	3
	SB0009	¢¢£¢¢£¢£££££¢¢££¢¢¢¢¢¢¢¢¢¢¢¢¢¢¢¢¢¢¢¢£¢£££££	664063777777200	BOV	1
	SB1527	¢¢£¢¢£¢£££££¢¢££¢¢¢¢¢¢¢¢¢¢¢¢¢¢¢¢¢¢¢¢¢££££££	664063777777400	BOV	1
672	SB0269	¢¢£¢¢£¢£££££¢¢££¢¢¢¢¢¢¢¢¢¢¢¢¢¢¢¢¢¢¢¢¢¢£££££	664063777777600	BOV	25
673	SB0144	¢¢£¢¢£¢£££££¢¢¢££££¢¢¢¢¢¢¢¢¢¢¢¢¢¢¢¢¢¢¢£££££	664070377777600	BOV	5
674	SB0289	¢¢£¢¢£¢£££££¢¢¢££¢¢¢¢¢¢¢¢¢¢¢¢¢¢¢¢¢¢¢¢¢£££££	664071777777600	BOV	3
1856	SB1049	¢¢£¢¢£¢£££££¢¢¢£¢£¢¢¢¢¢¢¢¢¢¢¢¢¢¢¢¢¢¢¢¢£££££	664072777777600	BOV_2	8
	SB1043	¢¢£¢¢£¢£££££¢¢¢£¢¢£££££¢¢¢¢¢¢¢¢¢¢¢¢¢¢¢£££££	664073017777600	BOV_2	1
1297	SB0667	¢¢£¢¢£¢£££££¢¢¢£¢¢£££¢¢¢¢¢¢¢¢¢¢¢¢¢¢¢¢¢£££££	664073077777600	BOV_2	2
	SB0917	¢¢£¢¢£¢£££££¢¢¢£¢¢£¢¢¢¢¢¢¢¢£££¢¢¢¢¢¢¢¢£££££	664073377077600	BOV_2	1
675	SB0271	¢¢£¢¢£¢£££££¢¢¢£¢¢£¢¢¢¢¢¢¢¢¢¢¢¢¢¢¢¢¢¢¢£££££	664073377777600	BOV_2	11
	SB1247	¢¢£¢¢£¢£££££¢¢¢£¢¢¢££¢¢¢¢¢¢¢¢¢¢¢¢¢¢¢¢¢£££££	664073477777600	BOV_2	1
	SB1502	¢¢£¢¢£¢£££££¢¢¢£¢¢¢¢£££¢¢¢¢¢¢¢££££££¢¢£££££	664073617700600	BOV_2	1
	SB0464	¢¢£¢¢£¢£££££¢¢¢£¢¢¢¢£¢¢¢¢¢¢¢£¢¢¢££¢¢¢¢£££££	664073677563600	BOV_2	1
1722		¢¢£¢¢£¢£££££¢¢¢£¢¢¢¢£¢¢¢¢¢¢¢¢¢¢¢¢¢¢¢£¢£££££	664073677777200	BOV_2	2
3521	SB0298	¢¢£¢¢£¢£££££¢¢¢£¢¢¢¢£¢¢¢¢¢¢¢¢¢¢¢¢¢¢¢¢¢£££££	664073677777600	BOV_2	46
	SB1066	¢¢£¢¢£¢£££££¢¢¢£¢¢¢¢¢¢£¢¢¢¢¢¢¢¢¢¢¢¢¢¢¢£££££	664073757777600	BOV_2	1
	SB0344	¢¢£¢¢£¢£££££¢¢¢£¢¢¢¢¢¢¢£¢¢¢¢¢¢¢¢¢¢¢¢¢¢£££££	664073767777600	BOV_2	1
1723		¢¢£¢¢£¢£££££¢¢¢£¢¢¢¢¢¢¢¢£££££££¢¢¢¢¢¢¢£££££	664073770037600	BOV_2	2
676	SB0263	¢¢£¢¢£¢£££££¢¢¢£¢¢¢¢¢¢¢¢¢££££££¢¢¢¢¢¢¢£££££	664073774037600	BOV_2	183
	SB0993	¢¢£¢¢£¢£££££¢¢¢£¢¢¢¢¢¢¢¢¢£¢¢¢¢¢¢¢¢¢¢¢¢£££££	664073775777600	BOV_2	1
1850	SB1045	¢¢£¢¢£¢£££££¢¢¢£¢¢¢¢¢¢¢¢¢¢£££¢¢¢¢¢¢¢¢¢£££££	664073776177600	BOV_2	5
	SB0465	¢¢£¢¢£¢£££££¢¢¢£¢¢¢¢¢¢¢¢¢¢££¢¢£¢¢£¢¢¢¢£££££	664073776333600	BOV_2	1
	SB1034	¢¢£¢¢£¢£££££¢¢¢£¢¢¢¢¢¢¢¢¢¢££¢¢¢¢¢£¢¢¢¢£££££	664073776373600	BOV_2	1
3860	SB1030	¢¢£¢¢£¢£££££¢¢¢£¢¢¢¢¢¢¢¢¢¢££¢¢¢¢¢¢¢¢¢¢£££££	664073776377600	BOV_2	2
	SB1072	¢¢£¢¢£¢£££££¢¢¢£¢¢¢¢¢¢¢¢¢¢£¢¢¢¢¢¢¢¢¢¢¢£££££	664073776777600	BOV_2	1
	SB1992	¢¢£¢¢£¢£££££¢¢¢£¢¢¢¢¢¢¢¢¢¢¢£££££££££¢¢£££££	664073777000600	BOV_2	1
	SB1032	¢¢£¢¢£¢£££££¢¢¢£¢¢¢¢¢¢¢¢¢¢¢£££¢¢¢£¢¢¢¢£££££	664073777073600	BOV_2	1
	SB1789	¢¢£¢¢£¢£££££¢¢¢£¢¢¢¢¢¢¢¢¢¢¢£¢¢¢¢¢¢¢¢¢¢£££££	664073777377600	BOV_2	1
	SB0660	¢¢£¢¢£¢£££££¢¢¢£¢¢¢¢¢¢¢¢¢¢¢¢££££££££¢¢£££££	664073777400600	BOV_2	1
	SB1067	¢¢£¢¢£¢£££££¢¢¢£¢¢¢¢¢¢¢¢¢¢¢¢£££¢¢¢¢¢¢¢£££££	664073777437600	BOV_2	1
1863	SB0978	¢¢£¢¢£¢£££££¢¢¢£¢¢¢¢¢¢¢¢¢¢¢¢£¢¢¢¢¢¢¢¢¢£££££	664073777577600	BOV_2	9
	SB0981	¢¢£¢¢£¢£££££¢¢¢£¢¢¢¢¢¢¢¢¢¢¢¢¢££££££££¢£££££	664073777600200	BOV_2	1
	SB1181	¢¢£¢¢£¢£££££¢¢¢£¢¢¢¢¢¢¢¢¢¢¢¢¢££¢££¢¢¢¢£££££	664073777623600	BOV_2	1
	SB1068	¢¢£¢¢£¢£££££¢¢¢£¢¢¢¢¢¢¢¢¢¢¢¢¢££¢¢¢¢¢¢¢£££££	664073777637600	BOV_2	1
	SB1809	¢¢£¢¢£¢£££££¢¢¢£¢¢¢¢¢¢¢¢¢¢¢¢¢£¢£££¢¢¢¢£££££	664073777643600	BOV_2	1
1625	SB0971	¢¢£¢¢£¢£££££¢¢¢£¢¢¢¢¢¢¢¢¢¢¢¢¢¢££££££¢¢£££££	664073777700600	BOV_2	3
1861	SB0668	¢¢£¢¢£¢£££££¢¢¢£¢¢¢¢¢¢¢¢¢¢¢¢¢¢£££¢¢¢¢¢£££££	664073777707600	BOV_2	6
677	SB0275	¢¢£¢¢£¢£££££¢¢¢£¢¢¢¢¢¢¢¢¢¢¢¢¢¢¢£££££¢¢£££££	664073777740600	BOV_2	33
1860	SB0666	¢¢£¢¢£¢£££££¢¢¢£¢¢¢¢¢¢¢¢¢¢¢¢¢¢¢££££¢¢¢£££££	664073777741600	BOV_2	5
3852	SB1035	¢¢£¢¢£¢£££££¢¢¢£¢¢¢¢¢¢¢¢¢¢¢¢¢¢¢£££¢¢¢¢£££££	664073777743600	BOV_2	2
3513	SB1016	¢¢£¢¢£¢£££££¢¢¢£¢¢¢¢¢¢¢¢¢¢¢¢¢¢¢££¢¢¢¢¢£££££	664073777747600	BOV_2	84
678	SB0272	¢¢£¢¢£¢£££££¢¢¢£¢¢¢¢¢¢¢¢¢¢¢¢¢¢¢£¢¢¢¢¢¢£££££	664073777757600	BOV_2	18
	SB0979	¢¢£¢¢£¢£££££¢¢¢£¢¢¢¢¢¢¢¢¢¢¢¢¢¢¢¢££¢¢£¢£££££	664073777763200	BOV_2	1
679	SB0142	¢¢£¢¢£¢£££££¢¢¢£¢¢¢¢¢¢¢¢¢¢¢¢¢¢¢¢££¢¢¢¢£££££	664073777763600	BOV_2	431
680	SB0139	¢¢£¢¢£¢£££££¢¢¢£¢¢¢¢¢¢¢¢¢¢¢¢¢¢¢¢£¢¢¢¢¢£££££	664073777767600	BOV_2	5
	SB1146	¢¢£¢¢£¢£££££¢¢¢£¢¢¢¢¢¢¢¢¢¢¢¢¢¢¢¢¢££¢¢¢£££££	664073777771600	BOV_2	1
1855	SB1033	¢¢£¢¢£¢£££££¢¢¢£¢¢¢¢¢¢¢¢¢¢¢¢¢¢¢¢¢£¢¢¢¢£££££	664073777773600	BOV_2	13
	SB1047	¢¢£¢¢£¢£££££¢¢¢£¢¢¢¢¢¢¢¢¢¢¢¢¢¢¢¢¢¢££¢¢£££££	664073777774600	BOV_2	1
	SB1186	¢¢£¢¢£¢£££££¢¢¢£¢¢¢¢¢¢¢¢¢¢¢¢¢¢¢¢¢¢£¢¢¢£££££	664073777775600	BOV_2	1
	SB1790	¢¢£¢¢£¢£££££¢¢¢£¢¢¢¢¢¢¢¢¢¢¢¢¢¢¢¢¢¢¢££¢£££££	664073777776200	BOV_2	1
681	SB0274	¢¢£¢¢£¢£££££¢¢¢£¢¢¢¢¢¢¢¢¢¢¢¢¢¢¢¢¢¢¢£¢¢£££££	664073777776600	BOV_2	14
682	SB0273	¢¢£¢¢£¢£££££¢¢¢£¢¢¢¢¢¢¢¢¢¢¢¢¢¢¢¢¢¢¢¢£¢£££££	664073777777200	BOV_2	70
3642	SB1348	¢¢£¢¢£¢£££££¢¢¢£¢¢¢¢¢¢¢¢¢¢¢¢¢¢¢¢¢¢¢¢¢££££££	664073777777400	BOV_2	4
683	SB0140	¢¢£¢¢£¢£££££¢¢¢£¢¢¢¢¢¢¢¢¢¢¢¢¢¢¢¢¢¢¢¢¢¢£££££	664073777777600	BOV_2	2215
		¢¢£¢¢£¢£££££¢¢¢¢¢¢¢¢¢¢¢¢¢¢¢¢¢¢¢¢¢¢¢¢£¢£££££	664077777777200	BOV	1
		¢¢£¢¢£¢£££££¢¢¢¢¢¢¢¢¢¢¢¢¢¢¢¢¢¢¢¢¢¢¢¢¢¢£££££	664077777777600	BOV	1
	SB1740	¢¢£¢¢£¢£££¢£¢¢¢£¢¢¢¢¢¢¢¢¢¢¢¢¢¢¢¢¢¢¢£¢¢£££££	664273777776600	BOV	1
	SB1653	¢¢£¢¢£¢¢££££¢¢¢£¢¢¢¢£¢¢¢¢¢¢¢¢¢¢¢¢¢¢¢¢¢£££££	666073677777600	BOV	1
3678	SB1320	¢¢£¢¢£¢¢£¢£¢¢¢¢£¢¢¢¢£¢¢¢¢¢¢¢¢¢¢¢¢¢¢¢¢¢£££££	666573677777600	BOV_1	3
	SB1645	¢¢£¢¢£¢¢£¢¢£¢¢¢£¢¢¢¢£¢¢¢¢¢¢¢¢¢¢¢¢¢¢¢¢¢£££££	666673677777600	BOV_1	1
3694	SB1676	¢¢£¢¢£¢¢£¢¢¢£¢¢£¢¢¢¢£¢¢¢¢¢¢¢¢¢¢¢¢¢¢¢¢¢£££££	666733677777600	BOV_1	2
	SB0333	¢¢£¢¢£¢¢£¢¢¢¢£££¢¢¢¢£¢¢¢¢¢¢¢¢¢¢¢¢¢¢¢¢¢£££££	666743677777600	BOV	1
3729	SB1423	¢¢£¢¢£¢¢£¢¢¢¢£££¢¢¢¢¢££¢¢¢¢¢¢£¢¢¢¢¢¢¢¢£££££	666743717677600	BOV	2
3553	SB1018	¢¢£¢¢£¢¢£¢¢¢¢¢££¢¢¢¢£¢¢¢¢¢¢¢¢¢¢¢¢¢¢¢¢¢£££££	666763677777600	BOV	17
	SB1208	¢¢£¢¢£¢¢£¢¢¢¢¢££¢¢¢¢¢¢¢¢¢¢¢¢¢¢¢¢¢¢¢¢¢¢£££££	666763777777600	BOV	1
	SB1412	¢¢£¢¢£¢¢£¢¢¢¢¢¢£££¢¢¢¢¢¢¢¢¢¢¢£¢¢¢¢¢¢¢¢£££££	666770777677600	BOV	1
		¢¢£¢¢£¢¢£¢¢¢¢¢¢£¢££££¢£¢¢¢¢¢¢¢¢¢¢¢¢¢£¢£££££	666772057777200	BOV_1	1
	SB1411	¢¢£¢¢£¢¢£¢¢¢¢¢¢£¢££¢¢¢¢¢¢¢¢¢¢£¢¢¢¢¢¢¢¢£££££	666772377677600	BOV_1	1
3635	SB1994	¢¢£¢¢£¢¢£¢¢¢¢¢¢£¢¢£¢£¢¢¢¢¢¢¢¢¢¢¢¢¢¢¢¢¢£££££	666773277777600	BOV_1	4
3712	SB1667	¢¢£¢¢£¢¢£¢¢¢¢¢¢£¢¢¢££¢¢¢¢¢¢¢¢¢¢¢¢¢¢¢¢¢£££££	666773477777600	BOV_1	2
3577	SB0896	¢¢£¢¢£¢¢£¢¢¢¢¢¢£¢¢¢¢£¢£¢¢¢¢¢¢¢¢¢¢¢¢¢¢¢£££££	666773657777600	BOV_1	11
	SB1642	¢¢£¢¢£¢¢£¢¢¢¢¢¢£¢¢¢¢£¢¢¢¢££££¢¢¢¢¢¢¢¢¢£££££	666773674177600	BOV_1	1
	SB0126	¢¢£¢¢£¢¢£¢¢¢¢¢¢£¢¢¢¢£¢¢¢¢¢¢¢¢¢£¢¢¢¢¢¢¢£££££	666773677737600	BOV_1	1
3605	SB1298	¢¢£¢¢£¢¢£¢¢¢¢¢¢£¢¢¢¢£¢¢¢¢¢¢¢¢¢¢¢¢¢¢££¢£££££	666773677776200	BOV_1	5
3571	SB1302	¢¢£¢¢£¢¢£¢¢¢¢¢¢£¢¢¢¢£¢¢¢¢¢¢¢¢¢¢¢¢¢¢£¢¢£££££	666773677776600	BOV_1	12
684	SB0265	¢¢£¢¢£¢¢£¢¢¢¢¢¢£¢¢¢¢£¢¢¢¢¢¢¢¢¢¢¢¢¢¢¢¢¢£££££	666773677777600	BOV_1	960
		¢¢£¢¢£¢¢£¢¢¢¢¢¢£¢¢¢¢¢¢¢¢¢¢¢¢¢£¢£££¢¢¢¢£££££	666773777643600	BOV_1	1
1603	SB0300	¢¢£¢¢£¢¢£¢¢¢¢¢¢£¢¢¢¢¢¢¢¢¢¢¢¢¢£¢¢¢¢¢¢¢¢£££££	666773777677600	BOV_1	11
	SB1324	¢¢£¢¢£¢¢£¢¢¢¢¢¢£¢¢¢¢¢¢¢¢¢¢¢¢¢¢¢¢¢¢¢¢¢¢£££££	666773777777600	BOV_1	1
	SB0466	¢¢£¢¢¢££££££¢££££¢¢¢¢¢¢¢¢¢¢¢¢¢¢¢£¢¢¢¢¢£££££	670041777767600	BOV	1
3645	SB1371	¢¢£¢¢¢£££££¢¢¢¢£¢¢¢¢£¢¢¢¢¢¢¢¢¢¢¢¢£¢¢¢¢£££££	670173677773600	BOV	4
3685	SB1392	¢¢£¢¢¢££££¢¢¢¢¢£¢¢¢¢£¢¢¢¢¢¢¢¢¢¢¢¢¢¢¢£¢£££££	670373677777200	BOV	2
	SB1147	¢¢£¢¢¢£££¢¢¢¢¢¢£¢¢¢¢£¢¢¢¢¢¢¢¢¢¢¢¢¢¢¢¢¢£££££	670773677777600	BOV	1
	SB1383	¢¢£¢¢¢£¢£¢¢¢£¢¢£¢¢¢¢¢¢¢¢¢¢¢¢¢¢¢¢¢¢¢¢¢¢£££££	672733777777600	BOV_1	1
		¢¢£¢¢¢£¢£¢¢¢¢¢££¢¢¢¢¢¢¢¢¢¢¢££¢¢¢¢¢¢¢¢¢£££££	672763777177600	BOV	1
		¢¢£¢¢¢£¢£¢¢¢¢¢££¢¢¢¢¢¢¢¢¢¢¢£¢¢¢¢¢¢¢¢¢¢£££££	672763777377600	BOV	1
3612	SB1368	¢¢£¢¢¢£¢£¢¢¢¢¢££¢¢¢¢¢¢¢¢¢¢¢¢¢¢¢¢¢¢£¢¢¢£££££	672763777775600	BOV	5
3610	SB1350	¢¢£¢¢¢£¢£¢¢¢¢¢¢£¢¢¢¢£¢¢¢¢££££¢¢¢¢¢¢¢¢¢£££££	672773674177600	BOV_1	5
3639	SB1278	¢¢£¢¢¢£¢£¢¢¢¢¢¢£¢¢¢¢£¢¢¢¢¢¢¢¢¢¢¢¢¢£¢¢¢£££££	672773677775600	BOV_1	3
	SB1803	¢¢£¢¢¢£¢£¢¢¢¢¢¢£¢¢¢¢£¢¢¢¢¢¢¢¢¢¢¢¢¢¢¢£¢£££££	672773677777200	BOV_1	1
3537	SB1361	¢¢£¢¢¢£¢£¢¢¢¢¢¢£¢¢¢¢£¢¢¢¢¢¢¢¢¢¢¢¢¢¢¢¢¢£££££	672773677777600	BOV_1	27
	SB0899	¢¢£¢¢¢£¢£¢¢¢¢¢¢£¢¢¢¢¢¢¢¢¢¢££¢¢¢¢¢¢¢¢¢¢£££££	672773776377600	BOV_1	1
3477	SB1003	¢¢£¢¢¢£¢£¢¢¢¢¢¢£¢¢¢¢¢¢¢¢¢¢¢£¢¢¢¢¢¢¢¢¢¢£££££	672773777377600	BOV_1	2
	SB0968	¢¢£¢¢¢£¢£¢¢¢¢¢¢£¢¢¢¢¢¢¢¢¢¢¢¢¢¢¢¢¢££¢¢¢£££££	672773777771600	BOV_1	1
1005	SB0882	¢¢£¢¢¢£¢£¢¢¢¢¢¢£¢¢¢¢¢¢¢¢¢¢¢¢¢¢¢¢¢¢£¢¢¢£££££	672773777775600	BOV_1	93
3529	SB0920	¢¢£¢¢¢£¢£¢¢¢¢¢¢£¢¢¢¢¢¢¢¢¢¢¢¢¢¢¢¢¢¢¢¢¢¢£££££	672773777777600	BOV_1	43
	SB2001	¢¢£¢¢¢¢£££££££££££¢¢£¢¢¢¢££££¢¢¢¢¢¢¢¢¢£££££	674000674177600	BOV	1
308	SB0953	¢¢£¢¢¢¢££££££££££¢¢¢¢¢¢¢¢¢¢¢¢£¢¢¢¢¢¢¢¢£££££	674001777677600	BOV	8
3730	SB1424	¢¢£¢¢¢¢£££££££££¢£££¢¢¢¢¢¢¢¢¢£¢¢¢¢¢¢¢¢£££££	674002177677600	BOV	3
	SB1351	¢¢£¢¢¢¢£££££££££¢¢¢¢£¢¢¢¢££££££¢¢¢¢¢¢¢£££££	674003674037600	BOV	1
3654	SB1682	¢¢£¢¢¢¢£££££££¢£¢¢¢¢£¢¢¢¢££££££¢¢¢¢¢¢¢£££££	674013674037600	BOV	3
1602	SB1925	¢¢£¢¢¢¢££££££¢££¢¢¢¢¢¢¢¢¢¢¢¢¢¢¢¢¢¢¢¢¢¢£££££	674023777777600	BOV	2
3536	SB1230	¢¢£¢¢¢¢££££££¢¢£¢¢¢¢£¢¢¢¢¢¢¢¢¢¢¢¢¢¢¢£¢£££££	674033677777200	BOV	29
	SB0675	¢¢£¢¢¢¢£££££¢¢££¢¢¢¢¢¢¢¢¢¢¢¢¢¢¢¢¢¢¢¢¢¢£££££	674063777777600	BOV	1
685	SB0288	¢¢£¢¢¢¢£££££¢¢¢£¢¢¢¢¢¢¢¢¢¢¢¢¢¢¢¢¢¢¢¢¢¢£££££	674073777777600	BOV	17
686	SB0343	¢¢£¢¢¢¢££££¢¢£¢£¢¢¢¢¢¢¢¢¢¢¢¢¢¢¢¢¢¢¢¢¢¢£££££	674153777777600	BOV	2
	SB1631	¢¢£¢¢¢¢££££¢¢¢¢£¢¢¢¢£¢¢¢¢¢¢£££¢¢¢¢¢¢¢¢£££££	674173677077600	BOV	1
	SB1654	¢¢£¢¢¢¢££££¢¢¢¢£¢¢¢¢£¢¢¢¢¢¢¢¢¢¢¢¢¢¢¢¢¢£££££	674173677777600	BOV	1
3693	SB1675	¢¢£¢¢¢¢££££¢¢¢¢£¢¢¢¢¢¢¢¢¢¢¢¢¢¢¢¢¢£¢¢¢¢£££££	674173777773600	BOV	2
3851	SB1926	¢¢£¢¢¢¢££££¢¢¢¢£¢¢¢¢¢¢¢¢¢¢¢¢¢¢¢¢¢¢¢¢¢¢£££££	674173777777600	BOV	2
	SB0970	¢¢£¢¢¢¢£££¢£¢£££¢¢¢¢£¢¢¢¢¢£¢¢¢¢¢££¢¢¢¢£££££	674243676763600	BOV	1
3667	SB1172	¢¢£¢¢¢¢£££¢¢¢£¢£¢¢¢¢£¢¢¢¢¢¢¢¢¢¢¢¢¢¢¢¢¢£££££	674353677777600	BOV	5
1595	SB1452	¢¢£¢¢¢¢£££¢¢¢¢££¢¢¢¢£¢¢¢¢¢¢¢¢¢¢¢¢¢¢¢¢¢£££££	674363677777600	BOV	4
		¢¢£¢¢¢¢£££¢¢¢¢££¢¢¢¢¢¢¢¢¢¢¢¢¢¢¢¢¢¢¢££££££££	674363777776000	BOV	1
1439	SB1370	¢¢£¢¢¢¢£££¢¢¢¢¢£¢¢¢¢£¢¢¢¢¢¢¢¢¢¢¢¢¢¢¢¢¢£££££	674373677777600	BOV	5
2843	SB1427	¢¢£¢¢¢¢£££¢¢¢¢¢£¢¢¢¢¢¢¢¢¢¢££¢£¢¢¢¢¢¢¢¢£££££	674373776277600	BOV	4
		¢¢£¢¢¢¢£££¢¢¢¢¢£¢¢¢¢¢¢¢¢¢¢¢¢¢£¢¢¢¢¢¢¢¢£££££	674373777677600	BOV	1
1006	SB0880	¢¢£¢¢¢¢£££¢¢¢¢¢£¢¢¢¢¢¢¢¢¢¢¢¢¢¢¢¢¢¢£££££££££	674373777774000	BOV	2
1007	SB0873	¢¢£¢¢¢¢£££¢¢¢¢¢£¢¢¢¢¢¢¢¢¢¢¢¢¢¢¢¢¢¢¢¢¢¢£££££	674373777777600	BOV	2
	SB0138	¢¢£¢¢¢¢££¢£¢¢¢¢£¢¢¢¢¢¢¢¢¢¢¢¢¢¢¢£££¢¢¢¢£££££	674573777743600	BOV	1
687	SB0301	¢¢£¢¢¢¢££¢£¢¢¢¢£¢¢¢¢¢¢¢¢¢¢¢¢¢¢¢¢£¢¢¢¢¢£££££	674573777767600	BOV	2
1849	SB1031	¢¢£¢¢¢¢££¢£¢¢¢¢£¢¢¢¢¢¢¢¢¢¢¢¢¢¢¢¢¢¢¢¢¢¢£££££	674573777777600	BOV	11
	SB2550	¢¢£¢¢¢¢££¢¢¢¢£¢£¢¢¢¢£¢¢¢¢¢¢¢¢¢¢¢¢¢¢¢¢¢£££££	674753677777600	BOV	1
	SB1743	¢¢£¢¢¢¢££¢¢¢¢¢££¢¢¢¢¢¢¢¢¢¢¢£££¢¢¢¢¢¢¢¢£££££	674763777077600	BOV	1
	SB1209	¢¢£¢¢¢¢££¢¢¢¢¢££¢¢¢¢¢¢¢¢¢¢¢¢¢¢¢¢¢¢¢¢¢¢£££££	674763777777600	BOV	1
3629	SB1378	¢¢£¢¢¢¢££¢¢¢¢¢¢£¢¢£¢¢¢¢¢¢¢¢¢¢¢¢£¢¢¢¢¢¢£££££	674773377757600	BOV	4
1853	SB1137	¢¢£¢¢¢¢££¢¢¢¢¢¢£¢¢¢¢£¢¢¢¢£££¢¢¢¢¢¢¢¢£¢£££££	674773674377200	BOV	7
		¢¢£¢¢¢¢££¢¢¢¢¢¢£¢¢¢¢£¢¢¢¢£¢¢¢¢¢¢¢¢¢¢£¢£££££	674773675777200	BOV	1
3625	SB1343	¢¢£¢¢¢¢££¢¢¢¢¢¢£¢¢¢¢£¢¢¢¢¢¢¢¢¢¢¢£¢¢¢¢¢£££££	674773677767600	BOV	4
3700	SB1890	¢¢£¢¢¢¢££¢¢¢¢¢¢£¢¢¢¢£¢¢¢¢¢¢¢¢¢¢¢¢¢£¢¢¢£££££	674773677775600	BOV	2
2130	SB1135	¢¢£¢¢¢¢££¢¢¢¢¢¢£¢¢¢¢£¢¢¢¢¢¢¢¢¢¢¢¢¢¢¢£¢£££££	674773677777200	BOV	10
	SB1968	¢¢£¢¢¢¢££¢¢¢¢¢¢£¢¢¢¢£¢¢¢¢¢¢¢¢¢¢¢¢¢¢¢¢¢£££££	674773677777600	BOV	1
3722	SB1101	¢¢£¢¢¢¢££¢¢¢¢¢¢£¢¢¢¢¢¢¢¢¢¢¢¢¢££¢¢¢¢¢¢¢£££££	674773777637600	BOV	2
	SB1660	¢¢£¢¢¢¢££¢¢¢¢¢¢£¢¢¢¢¢¢¢¢¢¢¢¢¢¢¢¢¢¢¢¢¢££££££	674773777777400	BOV	1
	SB1550	¢¢£¢¢¢¢££¢¢¢¢¢¢£¢¢¢¢¢¢¢¢¢¢¢¢¢¢¢¢¢¢¢¢¢¢£££££	674773777777600	BOV	1
		¢¢£¢¢¢¢¢££££££££££¢¢¢¢£¢¢¢¢¢¢¢¢¢¢¢¢¢¢¢£££££	676000757777600	BOV	1
		¢¢£¢¢¢¢¢££££££££££¢¢¢¢¢¢¢¢¢¢¢¢¢¢¢¢¢¢¢¢£££££	676000777777600	BOV	1
2133	SB1138	¢¢£¢¢¢¢¢£££££££££¢¢¢£¢¢¢¢¢¢¢¢¢¢¢¢¢¢¢£¢£££££	676001677777200	BOV	3
	SB0905	¢¢£¢¢¢¢¢£££££¢¢£¢¢¢¢£¢¢¢¢¢¢¢¢¢¢¢¢¢¢¢£¢£££££	676033677777200	BOV	1
3563	SB1259	¢¢£¢¢¢¢¢£££££¢¢£¢¢¢¢£¢¢¢¢¢¢¢¢¢¢¢¢¢¢¢¢¢£££££	676033677777600	BOV	15
	SB0939	¢¢£¢¢¢¢¢££££¢¢¢£¢¢¢¢¢¢¢¢¢¢¢¢¢¢¢¢£¢¢¢¢¢£££££	676073777767600	BOV	1
3846	SB1551	¢¢£¢¢¢¢¢££££¢¢¢£¢¢¢¢¢¢¢¢¢¢¢¢¢¢¢¢¢¢¢¢¢¢£££££	676073777777600	BOV	3
	SB1285	¢¢£¢¢¢¢¢£££¢¢£££¢¢¢¢£¢¢¢¢¢¢¢££¢¢¢¢¢¢¢¢£££££	676143677477600	BOV	1
2702	SB1795	¢¢£¢¢¢¢¢£££¢¢£££¢¢¢¢¢¢¢¢¢¢¢¢¢¢¢¢¢¢¢¢¢¢£££££	676143777777600	BOV	4
3452	SB0914	¢¢£¢¢¢¢¢£££¢¢¢¢£¢¢¢¢¢¢¢¢¢¢¢¢¢¢¢¢¢¢¢¢¢¢£££££	676173777777600	BOV	3
		¢¢£¢¢¢¢¢££¢£¢¢¢¢¢¢¢¢¢¢¢¢¢¢¢¢¢¢££££££¢¢£££££	676277777700600	BOV	1
	SB1205	¢¢£¢¢¢¢¢££¢¢££££¢¢¢¢¢¢¢¢¢¢¢¢¢¢¢¢¢¢¢¢¢¢£££££	676303777777600	BOV	1
	SB1772	¢¢£¢¢¢¢¢££¢¢¢££££¢¢¢¢¢£¢¢¢¢¢¢¢¢¢¢¢¢¢¢¢£££££	676341757777600	BOV	1
	SB1150	¢¢£¢¢¢¢¢££¢¢¢£££¢¢¢¢£¢¢¢¢¢£££££¢¢¢¢¢¢¢£££££	676343676037600	BOV	1
3604	SB1269	¢¢£¢¢¢¢¢££¢¢¢£££¢¢¢¢£¢¢¢¢¢¢¢¢¢¢¢¢¢¢¢¢¢£££££	676343677777600	BOV	5
3727	SB1445	¢¢£¢¢¢¢¢££¢¢¢£££¢¢¢¢¢¢¢¢¢¢££¢£¢¢¢¢¢¢¢¢£££££	676343776277600	BOV	3
3733	SB1428	¢¢£¢¢¢¢¢££¢¢¢£££¢¢¢¢¢¢¢¢¢¢¢¢¢£¢¢¢¢¢¢¢¢£££££	676343777677600	BOV	3
		¢¢£¢¢¢¢¢££¢¢¢£££¢¢¢¢¢¢¢¢¢¢¢¢¢¢¢¢¢¢¢£¢¢£££££	676343777776600	BOV	1
	SB1797	¢¢£¢¢¢¢¢££¢¢¢£¢£¢¢¢¢£¢¢¢¢¢¢¢¢¢¢¢¢¢¢¢¢¢£££££	676353677777600	BOV	1
		¢¢£¢¢¢¢¢££¢¢¢¢££¢¢¢£¢¢¢¢¢¢¢¢¢¢¢¢¢¢¢£¢¢£££££	676363577776600	BOV	1
3641	SB1332	¢¢£¢¢¢¢¢££¢¢¢¢££¢¢¢¢£¢¢¢¢££££¢¢¢¢¢¢¢¢¢£££££	676363674177600	BOV	3
3679	SB1333	¢¢£¢¢¢¢¢££¢¢¢¢££¢¢¢¢£¢¢¢¢¢¢¢¢¢¢¢¢¢¢¢¢¢£££££	676363677777600	BOV	2
2024		¢¢£¢¢¢¢¢££¢¢¢¢££¢¢¢¢¢¢¢¢¢¢¢¢¢¢¢¢¢¢¢¢¢¢£££££	676363777777600	BOV	2
	SB1997	¢¢£¢¢¢¢¢££¢¢¢¢¢£¢¢¢¢£¢¢¢¢££££¢¢¢¢¢¢¢¢¢£££££	676373674177600	BOV	1
3607	SB1338	¢¢£¢¢¢¢¢££¢¢¢¢¢£¢¢¢¢£¢¢¢¢¢¢¢¢¢¢¢¢¢¢¢¢¢£££££	676373677777600	BOV	5
3423	SB2097	¢¢£¢¢¢¢¢££¢¢¢¢¢£¢¢¢¢¢¢¢¢¢¢¢¢¢¢¢¢¢¢¢£¢¢£££££	676373777776600	BOV	2
	SB0871	¢¢£¢¢¢¢¢££¢¢¢¢¢£¢¢¢¢¢¢¢¢¢¢¢¢¢¢¢¢¢¢¢¢¢¢£££££	676373777777600	BOV	1
	SB1798	¢¢£¢¢¢¢¢£¢£££££££££¢¢¢¢¢¢¢¢¢¢¢¢¢¢¢¢¢¢¢£££££	676400377777600	BOV	1
3522	SB1970	¢¢£¢¢¢¢¢£¢££££££££¢¢£¢£¢¢¢¢¢¢¢¢¢¢¢¢¢¢¢£££££	676400657777600	BOV	45
3699	SB1871	¢¢£¢¢¢¢¢£¢£££££££¢¢¢£¢¢¢¢¢¢¢¢¢¢¢¢¢¢¢¢¢£££££	676401677777600	BOV	2
	SB1634	¢¢£¢¢¢¢¢£¢££££¢£¢¢¢¢£¢¢¢¢¢¢¢¢¢¢¢¢¢¢¢£¢£££££	676413677777200	BOV_1	1
	SB1891	¢¢£¢¢¢¢¢£¢££££¢£¢¢¢¢¢¢¢¢¢¢¢¢¢¢¢¢¢¢¢¢¢¢£££££	676413777777600	BOV_1	1
3706	SB1998	¢¢£¢¢¢¢¢£¢£££¢¢£¢¢¢¢£¢¢¢¢¢¢¢¢¢¢¢¢¢¢¢¢¢£££££	676433677777600	BOV_1	2
3526	SB1969	¢¢£¢¢¢¢¢£¢£££¢¢£¢¢¢¢¢¢¢¢¢¢¢¢¢¢¢¢¢¢¢¢¢££££££	676433777777400	BOV_1	42
	SB0297	¢¢£¢¢¢¢¢£¢££¢¢££¢¢¢¢¢¢¢¢¢¢¢¢¢¢¢¢¢¢¢¢¢¢£££££	676463777777600	BOV	1
3598	SB1635	¢¢£¢¢¢¢¢£¢££¢¢¢£¢¢£¢¢¢¢¢¢¢¢¢¢¢¢£¢¢¢¢¢¢£££££	676473377757600	BOV_1	7
3592	SB1646	¢¢£¢¢¢¢¢£¢££¢¢¢£¢¢¢¢£¢¢¢¢¢¢¢¢¢¢¢¢¢¢¢¢¢£££££	676473677777600	BOV_1	7
	SB1057	¢¢£¢¢¢¢¢£¢££¢¢¢£¢¢¢¢¢£¢¢¢¢¢¢¢¢¢¢¢¢¢¢¢¢£££££	676473737777600	BOV_1	1
	SB1528	¢¢£¢¢¢¢¢£¢££¢¢¢£¢¢¢¢¢¢¢¢¢¢££££££££¢¢¢¢£££££	676473776003600	BOV_1	1
	SB1529	¢¢£¢¢¢¢¢£¢££¢¢¢£¢¢¢¢¢¢¢¢¢¢¢¢¢¢¢£¢¢¢¢¢¢£££££	676473777757600	BOV_1	1
688	SB0129	¢¢£¢¢¢¢¢£¢££¢¢¢£¢¢¢¢¢¢¢¢¢¢¢¢¢¢¢¢¢¢¢¢¢¢£££££	676473777777600	BOV_1	30
957	SB2020	¢¢£¢¢¢¢¢£¢£¢£££££¢¢¢¢¢¢¢¢¢¢££¢¢¢¢¢¢¢¢¢£££££	676501777177600	BOV	2
	SB0998	¢¢£¢¢¢¢¢£¢£¢£¢¢£¢¢¢¢¢¢¢¢¢¢¢¢¢¢¢¢¢¢¢¢¢¢£££££	676533777777600	BOV_1	1
		¢¢£¢¢¢¢¢£¢£¢£¢¢¢¢¢¢¢¢¢¢¢¢¢¢¢¢¢¢¢¢¢¢¢¢¢£££££	676537777777600	BOV	1
3564	SB1303	¢¢£¢¢¢¢¢£¢£¢¢£¢£¢¢¢¢¢¢¢¢¢¢¢¢¢¢¢¢¢¢¢¢¢¢£££££	676553777777600	BOV_1	15
3601	SB1899	¢¢£¢¢¢¢¢£¢£¢¢¢£££¢¢¢¢¢¢¢¢¢¢¢¢¢¢¢¢¢¢¢¢¢£££££	676561777777600	BOV	6
	SB1644	¢¢£¢¢¢¢¢£¢£¢¢¢££¢££££¢¢¢¢¢¢¢¢¢¢¢¢¢¢¢¢¢£££££	676562077777600	BOV	1
2433	SB1287	¢¢£¢¢¢¢¢£¢£¢¢¢££¢¢¢¢£¢¢¢¢¢¢¢££¢¢¢¢¢¢¢¢£££££	676563677477600	BOV	2
3671	SB1283	¢¢£¢¢¢¢¢£¢£¢¢¢££¢¢¢¢£¢¢¢¢¢¢¢¢¢¢¢¢¢£££££££££	676563677774000	BOV	2
	SB1214	¢¢£¢¢¢¢¢£¢£¢¢¢££¢¢¢¢¢¢¢¢¢¢¢¢¢¢¢¢¢¢¢£¢¢£££££	676563777776600	BOV	1
1008	SB0678	¢¢£¢¢¢¢¢£¢£¢¢¢££¢¢¢¢¢¢¢¢¢¢¢¢¢¢¢¢¢¢¢¢¢¢£££££	676563777777600	BOV	14
3554	SB1357	¢¢£¢¢¢¢¢£¢£¢¢¢¢£¢¢£££¢¢¢¢¢¢¢¢¢¢¢¢¢¢¢¢¢£££££	676573077777600	BOV_1	18
3728	SB1422	¢¢£¢¢¢¢¢£¢£¢¢¢¢£¢¢£¢¢¢¢¢¢¢¢¢¢£¢¢¢¢¢¢¢¢£££££	676573377677600	BOV_1	2
3618	SB1897	¢¢£¢¢¢¢¢£¢£¢¢¢¢£¢¢£¢¢¢¢¢¢¢¢¢¢¢¢¢¢¢¢¢¢¢£££££	676573377777600	BOV_1	5
3688	SB1630	¢¢£¢¢¢¢¢£¢£¢¢¢¢£¢¢¢££££££££££££££££££££££££	676573400000000	BOV_1	3
3603	SB0982	¢¢£¢¢¢¢¢£¢£¢¢¢¢£¢¢¢££££¢¢¢¢¢¢¢¢¢¢¢¢¢¢¢£££££	676573417777600	BOV_1	5
2131	SB1185	¢¢£¢¢¢¢¢£¢£¢¢¢¢£¢¢¢££¢¢¢¢¢¢¢¢¢¢¢¢¢¢¢¢¢£££££	676573477777600	BOV_1	2
3550	SB1263	¢¢£¢¢¢¢¢£¢£¢¢¢¢£¢¢¢¢££££¢£££¢¢¢¢¢¢¢¢¢¢£££££	676573604377600	BOV_1	18
3594	SB1286	¢¢£¢¢¢¢¢£¢£¢¢¢¢£¢¢¢¢£¢¢¢¢¢¢¢££¢¢¢¢¢¢¢¢£££££	676573677477600	BOV_1	7
	SB1288	¢¢£¢¢¢¢¢£¢£¢¢¢¢£¢¢¢¢£¢¢¢¢¢¢¢£¢¢¢¢¢¢¢¢¢£££££	676573677577600	BOV_1	1
3623	SB1284	¢¢£¢¢¢¢¢£¢£¢¢¢¢£¢¢¢¢£¢¢¢¢¢¢¢¢¢¢¢¢¢£££££££££	676573677774000	BOV_1	5
3533	SB1257	¢¢£¢¢¢¢¢£¢£¢¢¢¢£¢¢¢¢£¢¢¢¢¢¢¢¢¢¢¢¢¢¢¢¢¢£££££	676573677777600	BOV_1	35
	SB1647	¢¢£¢¢¢¢¢£¢£¢¢¢¢£¢¢¢¢¢¢¢¢¢££££££££¢¢¢¢¢£££££	676573774007600	BOV_1	1
689	SB0146	¢¢£¢¢¢¢¢£¢£¢¢¢¢£¢¢¢¢¢¢¢¢¢¢¢£££££¢¢¢¢¢¢£££££	676573777017600	BOV_1	14
778	SB0327	¢¢£¢¢¢¢¢£¢£¢¢¢¢£¢¢¢¢¢¢¢¢¢¢¢£££¢¢¢¢¢¢¢¢£££££	676573777077600	BOV_1	10
1857	SB1058	¢¢£¢¢¢¢¢£¢£¢¢¢¢£¢¢¢¢¢¢¢¢¢¢¢££¢¢¢¢¢¢¢¢¢£££££	676573777177600	BOV_1	5
3576	SB1385	¢¢£¢¢¢¢¢£¢£¢¢¢¢£¢¢¢¢¢¢¢¢¢¢¢¢££¢¢¢¢¢¢¢¢£££££	676573777477600	BOV_1	12
	SB1061	¢¢£¢¢¢¢¢£¢£¢¢¢¢£¢¢¢¢¢¢¢¢¢¢¢¢£¢¢¢¢¢¢¢¢¢£££££	676573777577600	BOV_1	1
690	SB0163	¢¢£¢¢¢¢¢£¢£¢¢¢¢£¢¢¢¢¢¢¢¢¢¢¢¢¢££¢¢¢¢¢¢¢£££££	676573777637600	BOV_1	7
757	SB0328	¢¢£¢¢¢¢¢£¢£¢¢¢¢£¢¢¢¢¢¢¢¢¢¢¢¢¢£¢¢¢¢¢¢¢¢£££££	676573777677600	BOV_1	9
3528	SB1312	¢¢£¢¢¢¢¢£¢£¢¢¢¢£¢¢¢¢¢¢¢¢¢¢¢¢¢¢£¢¢¢¢¢¢¢£££££	676573777737600	BOV_1	39
	SB1389	¢¢£¢¢¢¢¢£¢£¢¢¢¢£¢¢¢¢¢¢¢¢¢¢¢¢¢¢¢£££££¢¢£££££	676573777740600	BOV_1	1
	SB1054	¢¢£¢¢¢¢¢£¢£¢¢¢¢£¢¢¢¢¢¢¢¢¢¢¢¢¢¢¢£££¢¢¢¢£££££	676573777743600	BOV_1	1
3636	SB0943	¢¢£¢¢¢¢¢£¢£¢¢¢¢£¢¢¢¢¢¢¢¢¢¢¢¢¢¢¢£¢¢¢¢¢¢£££££	676573777757600	BOV_1	4
3666	SB1164	¢¢£¢¢¢¢¢£¢£¢¢¢¢£¢¢¢¢¢¢¢¢¢¢¢¢¢¢¢¢££¢¢¢¢£££££	676573777763600	BOV_1	5
3597	SB1629	¢¢£¢¢¢¢¢£¢£¢¢¢¢£¢¢¢¢¢¢¢¢¢¢¢¢¢¢¢¢¢££¢¢¢£££££	676573777771600	BOV_1	7
3707	SB1062	¢¢£¢¢¢¢¢£¢£¢¢¢¢£¢¢¢¢¢¢¢¢¢¢¢¢¢¢¢¢¢¢£¢¢¢£££££	676573777775600	BOV_1	2
	SB1504	¢¢£¢¢¢¢¢£¢£¢¢¢¢£¢¢¢¢¢¢¢¢¢¢¢¢¢¢¢¢¢¢¢££¢£££££	676573777776200	BOV_1	1
	SB1758	¢¢£¢¢¢¢¢£¢£¢¢¢¢£¢¢¢¢¢¢¢¢¢¢¢¢¢¢¢¢¢¢¢£¢¢£££££	676573777776600	BOV_1	1
3617	SB1671	¢¢£¢¢¢¢¢£¢£¢¢¢¢£¢¢¢¢¢¢¢¢¢¢¢¢¢¢¢¢¢¢¢¢£££££££	676573777777000	BOV_1	6
691	SB0130	¢¢£¢¢¢¢¢£¢£¢¢¢¢£¢¢¢¢¢¢¢¢¢¢¢¢¢¢¢¢¢¢¢¢¢¢£££££	676573777777600	BOV_1	788
3643	SB1349	¢¢£¢¢¢¢¢£¢¢££££££££££££££££££££££££££££££££	676600000000000	BOV	3
	SB0911	¢¢£¢¢¢¢¢£¢¢££££££££££¢¢¢¢¢¢¢¢¢¢¢¢¢¢¢¢¢£££££	676600077777600	BOV	1
	SB0919	¢¢£¢¢¢¢¢£¢¢££££££££¢¢¢¢¢¢¢¢¢¢¢¢¢¢¢¢¢¢¢£££££	676600377777600	BOV	1
	SB0923	¢¢£¢¢¢¢¢£¢¢£££££¢¢¢¢¢¢¢¢¢¢¢¢¢¢¢¢¢¢¢¢¢¢£££££	676603777777600	BOV	1
	SB1991	¢¢£¢¢¢¢¢£¢¢£££¢£¢£¢¢£¢¢¢¢¢¢¢¢¢¢¢¢¢¢¢¢¢£££££	676612677777600	BOV_1	1
	SB1978	¢¢£¢¢¢¢¢£¢¢£££¢£¢¢¢¢£¢£¢¢¢¢¢¢¢¢¢¢¢¢¢¢¢£££££	676613657777600	BOV_1	1
3534	SB1191	¢¢£¢¢¢¢¢£¢¢£££¢£¢¢¢¢£¢¢¢¢¢¢¢¢¢¢¢¢¢¢¢¢¢£££££	676613677777600	BOV_1	33
	SB1927	¢¢£¢¢¢¢¢£¢¢££¢¢£¢¢¢¢£¢¢¢¢¢¢¢¢¢¢¢¢¢¢¢£¢£££££	676633677777200	BOV_1	1
3674	SB1300	¢¢£¢¢¢¢¢£¢¢££¢¢£¢¢¢¢£¢¢¢¢¢¢¢¢¢¢¢¢¢¢¢¢¢£££££	676633677777600	BOV_1	2
	SB1552	¢¢£¢¢¢¢¢£¢¢££¢¢£¢¢¢¢¢¢¢¢¢¢¢¢¢¢¢¢¢¢¢¢£££££££	676633777777000	BOV_1	1
3531	SB1336	¢¢£¢¢¢¢¢£¢¢£¢£££¢¢¢¢£¢¢¢¢¢¢¢¢¢¢¢¢¢¢¢¢¢£££££	676643677777600	BOV	36
3649	SB1395	¢¢£¢¢¢¢¢£¢¢£¢¢£££¢¢¢£¢¢¢¢¢¢¢¢¢¢¢¢¢¢¢¢¢£££££	676661677777600	BOV	3
	SB1326	¢¢£¢¢¢¢¢£¢¢£¢¢££¢¢¢¢£¢¢¢¢¢¢¢¢¢¢¢¢¢¢¢¢¢£££££	676663677777600	BOV	1
		¢¢£¢¢¢¢¢£¢¢£¢¢££¢¢¢¢¢¢¢¢¢¢¢¢¢¢¢¢¢¢¢¢¢¢£££££	676663777777600	BOV	1
3705	SB1995	¢¢£¢¢¢¢¢£¢¢£¢¢¢£¢£¢¢£¢¢¢¢¢¢¢¢¢¢¢¢¢¢¢¢¢£££££	676672677777600	BOV_1	2
3616	SB1668	¢¢£¢¢¢¢¢£¢¢£¢¢¢£¢¢¢££¢¢¢¢££££¢¢¢¢¢¢¢¢¢£££££	676673474177600	BOV_1	5
3517	SB1193	¢¢£¢¢¢¢¢£¢¢£¢¢¢£¢¢¢¢£¢¢¢¢££££¢¢¢¢¢¢¢¢¢£££££	676673674177600	BOV_1	63
3638	SB1253	¢¢£¢¢¢¢¢£¢¢£¢¢¢£¢¢¢¢£¢¢¢¢¢£££¢¢¢¢¢¢¢¢¢£££££	676673676177600	BOV_1	4
3681	SB1363	¢¢£¢¢¢¢¢£¢¢£¢¢¢£¢¢¢¢£¢¢¢¢¢¢¢¢£¢¢¢¢¢¢¢¢£££££	676673677677600	BOV_1	2
3614	SB1637	¢¢£¢¢¢¢¢£¢¢£¢¢¢£¢¢¢¢£¢¢¢¢¢¢¢¢¢¢¢¢¢¢¢£¢£££££	676673677777200	BOV_1	5
692	SB0294	¢¢£¢¢¢¢¢£¢¢£¢¢¢£¢¢¢¢£¢¢¢¢¢¢¢¢¢¢¢¢¢¢¢¢¢£££££	676673677777600	BOV_1	103
1118	SB0989	¢¢£¢¢¢¢¢£¢¢£¢¢¢£¢¢¢¢¢¢£¢¢¢¢¢¢¢¢¢¢¢¢¢¢¢£££££	676673757777600	BOV_1	3
1185	SB0897	¢¢£¢¢¢¢¢£¢¢£¢¢¢£¢¢¢¢¢¢¢¢¢¢¢¢¢¢¢¢¢¢¢¢¢¢£££££	676673777777600	BOV_1	4
3656	SB1873	¢¢£¢¢¢¢¢£¢¢¢£££££££££££¢¢¢¢¢¢¢¢¢¢¢¢¢¢¢£££££	676700017777600	BOV	3
	SB1339	¢¢£¢¢¢¢¢£¢¢¢££££££¢¢£¢¢¢¢¢¢¢¢¢¢¢¢¢¢¢¢¢£££££	676700677777600	BOV	1
2839	SB0952	¢¢£¢¢¢¢¢£¢¢¢£££££¢¢¢¢¢¢¢¢¢¢¢¢£¢¢¢¢¢¢¢¢£££££	676701777677600	BOV	13
	SB0949	¢¢£¢¢¢¢¢£¢¢¢£££££¢¢¢¢¢¢¢¢¢¢¢¢¢¢¢£¢¢¢¢¢£££££	676701777767600	BOV	1
	SB1928	¢¢£¢¢¢¢¢£¢¢¢££££¢¢¢¢¢¢¢¢¢¢¢¢¢¢¢¢¢¢¢¢¢¢£££££	676703777777600	BOV	1
1009	SB0895	¢¢£¢¢¢¢¢£¢¢¢££¢£¢¢¢¢£¢¢¢¢¢¢¢¢¢¢¢£¢¢¢¢¢£££££	676713677767600	BOV_1	2
3551	SB1345	¢¢£¢¢¢¢¢£¢¢¢££¢£¢¢¢¢£¢¢¢¢¢¢¢¢¢¢¢¢¢¢¢¢¢£££££	676713677777600	BOV_1	20
	SB1260	¢¢£¢¢¢¢¢£¢¢¢£¢££¢¢¢¢¢¢¢¢¢¢¢¢¢¢¢¢¢¢¢¢¢¢£££££	676723777777600	BOV	1
	SB1396	¢¢£¢¢¢¢¢£¢¢¢£¢¢£¢¢¢¢£££¢¢¢¢¢¢¢¢££¢¢¢¢¢£££££	676733617747600	BOV_1	1
3608	SB1340	¢¢£¢¢¢¢¢£¢¢¢£¢¢£¢¢¢¢£¢¢¢¢££££¢¢¢¢¢¢¢¢¢£££££	676733674177600	BOV_1	5
3530	SB1091	¢¢£¢¢¢¢¢£¢¢¢£¢¢£¢¢¢¢£¢¢¢¢¢¢¢¢¢¢¢¢¢¢¢£¢£££££	676733677777200	BOV_1	36
1010	SB0848	¢¢£¢¢¢¢¢£¢¢¢£¢¢£¢¢¢¢£¢¢¢¢¢¢¢¢¢¢¢¢¢¢¢¢¢£££££	676733677777600	BOV_1	15
	SB1202	¢¢£¢¢¢¢¢£¢¢¢£¢¢£¢¢¢¢¢¢¢¢¢¢££££££££¢¢¢¢£££££	676733776003600	BOV_1	1
	SB1163	¢¢£¢¢¢¢¢£¢¢¢£¢¢£¢¢¢¢¢¢¢¢¢¢¢¢¢¢¢¢¢¢¢£¢¢£££££	676733777776600	BOV_1	1
	SB1974	¢¢£¢¢¢¢¢£¢¢¢£¢¢£¢¢¢¢¢¢¢¢¢¢¢¢¢¢¢¢¢¢¢¢£££££££	676733777777000	BOV_1	1
1932	SB0950	¢¢£¢¢¢¢¢£¢¢¢£¢¢£¢¢¢¢¢¢¢¢¢¢¢¢¢¢¢¢¢¢¢¢¢¢£££££	676733777777600	BOV_1	7
3540	SB1306	¢¢£¢¢¢¢¢£¢¢¢¢££££££££££££££££££¢¢¢¢¢¢¢£££££	676740000037600	BOV	25
1848	SB1051	¢¢£¢¢¢¢¢£¢¢¢¢£££££¢¢£¢¢¢¢¢¢¢¢¢¢¢¢¢¢¢¢¢£££££	676740677777600	BOV	7
	SB0972	¢¢£¢¢¢¢¢£¢¢¢¢££££¢£££££££¢£££££¢¢¢¢¢¢¢£££££	676741002037600	BOV	1
	SB1670	¢¢£¢¢¢¢¢£¢¢¢¢££££¢£££¢¢¢¢¢¢¢¢¢¢£¢¢¢¢¢¢£££££	676741077757600	BOV	1
	SB1659	¢¢£¢¢¢¢¢£¢¢¢¢££££¢£¢¢¢¢¢¢¢¢¢¢¢¢£¢¢¢£¢¢£££££	676741377756600	BOV	1
3558	SB0963	¢¢£¢¢¢¢¢£¢¢¢¢££££¢£¢¢¢¢¢¢¢¢¢¢¢¢£¢¢¢¢¢¢£££££	676741377757600	BOV	16
	SB1895	¢¢£¢¢¢¢¢£¢¢¢¢££££¢¢¢£¢¢¢¢££££¢¢¢¢¢¢¢¢¢£££££	676741674177600	BOV	1
	SB0942	¢¢£¢¢¢¢¢£¢¢¢¢££££¢¢¢¢¢¢¢¢¢¢¢¢¢¢¢¢¢¢¢¢¢£££££	676741777777600	BOV	1
	SB1628	¢¢£¢¢¢¢¢£¢¢¢¢£££¢¢£¢¢¢¢¢¢¢¢¢¢¢¢£¢¢¢¢¢¢£££££	676743377757600	BOV	1
1011	SB0299	¢¢£¢¢¢¢¢£¢¢¢¢£££¢¢£¢¢¢¢¢¢¢¢¢¢¢¢¢¢¢¢¢¢¢£££££	676743377777600	BOV	3
	SB0338	¢¢£¢¢¢¢¢£¢¢¢¢£££¢¢¢¢£¢¢¢¢¢£££¢¢¢¢¢¢¢¢¢£££££	676743676177600	BOV	1
693	SB0332	¢¢£¢¢¢¢¢£¢¢¢¢£££¢¢¢¢£¢¢¢¢¢¢¢¢¢¢¢¢¢¢¢¢¢£££££	676743677777600	BOV	2
3569	SB1347	¢¢£¢¢¢¢¢£¢¢¢¢£££¢¢¢¢¢¢£¢¢££¢¢¢¢¢¢¢¢¢¢¢£££££	676743754777600	BOV	13
3726	SB1444	¢¢£¢¢¢¢¢£¢¢¢¢£££¢¢¢¢¢¢¢¢¢¢££¢£¢¢¢¢¢¢¢¢£££££	676743776277600	BOV	4
	SB1442	¢¢£¢¢¢¢¢£¢¢¢¢£££¢¢¢¢¢¢¢¢¢¢£¢¢£¢¢¢¢¢¢¢¢£££££	676743776677600	BOV	1
3743	SB1440	¢¢£¢¢¢¢¢£¢¢¢¢£££¢¢¢¢¢¢¢¢¢¢¢¢¢£¢¢¢¢¢¢¢¢£££££	676743777677600	BOV	3
694	SB0127	¢¢£¢¢¢¢¢£¢¢¢¢£££¢¢¢¢¢¢¢¢¢¢¢¢¢¢¢¢¢¢¢¢¢¢£££££	676743777777600	BOV	4
3697	SB1687	¢¢£¢¢¢¢¢£¢¢¢¢£¢£¢¢¢¢£¢¢¢¢££££¢¢¢¢¢¢¢¢¢£££££	676753674177600	BOV_1	2
3578	SB1624	¢¢£¢¢¢¢¢£¢¢¢¢£¢£¢¢¢¢£¢¢¢¢¢¢¢¢¢¢¢¢¢¢¢¢¢£££££	676753677777600	BOV_1	10
2475		¢¢£¢¢¢¢¢£¢¢¢¢£¢£¢¢¢¢¢¢¢¢¢¢¢¢¢£¢¢¢¢¢¢¢¢£££££	676753777677600	BOV_1	2
1012	SB0877	¢¢£¢¢¢¢¢£¢¢¢¢¢£££££££££££££££££££¢¢¢¢¢£££££	676760000007600	BOV	2
1013	SB0840	¢¢£¢¢¢¢¢£¢¢¢¢¢££££££££££¢¢££££¢¢£¢¢¢¢¢£££££	676760006067600	BOV	8
	SB0937	¢¢£¢¢¢¢¢£¢¢¢¢¢£££££££¢¢¢¢¢¢¢¢¢¢¢¢¢£¢¢¢£££££	676760077775600	BOV	1
		¢¢£¢¢¢¢¢£¢¢¢¢¢££££¢¢¢¢££¢¢¢¢¢¢¢¢¢¢¢¢£¢£££££	676760747777200	BOV	1
1784	SB2021	¢¢£¢¢¢¢¢£¢¢¢¢¢££££¢¢¢¢¢¢¢¢¢¢¢¢¢¢¢¢¢¢¢¢£££££	676760777777600	BOV	2
		¢¢£¢¢¢¢¢£¢¢¢¢¢£££¢££££¢¢¢¢¢¢¢¢¢¢¢¢¢¢¢¢£££££	676761037777600	BOV	1
3606	SB1323	¢¢£¢¢¢¢¢£¢¢¢¢¢£££¢£¢¢¢¢¢¢¢¢¢¢¢¢£¢¢¢¢¢¢£££££	676761377757600	BOV	5
3535	SB1188	¢¢£¢¢¢¢¢£¢¢¢¢¢£££¢¢¢£¢¢¢¢¢¢¢¢¢¢¢¢¢¢¢¢¢£££££	676761677777600	BOV	29
3861	SB1168	¢¢£¢¢¢¢¢£¢¢¢¢¢£££¢¢¢¢¢£¢¢¢¢¢¢¢¢¢¢¢¢¢¢¢£££££	676761757777600	BOV	8
	SB2005	¢¢£¢¢¢¢¢£¢¢¢¢¢££¢£££££¢¢¢¢¢¢¢¢¢¢¢¢¢¢¢¢£££££	676762037777600	BOV	1
3561	SB1638	¢¢£¢¢¢¢¢£¢¢¢¢¢££¢££££¢¢¢¢¢¢¢¢¢¢¢¢¢¢¢¢¢£££££	676762077777600	BOV	15
		¢¢£¢¢¢¢¢£¢¢¢¢¢££¢¢£¢£¢¢¢¢¢¢¢¢¢¢¢¢¢¢¢¢¢£££££	676763277777600	BOV	1
3650	SB1626	¢¢£¢¢¢¢¢£¢¢¢¢¢££¢¢£¢¢¢¢¢¢¢¢¢¢¢¢£¢¢¢¢¢¢£££££	676763377757600	BOV	3
	SB2003	¢¢£¢¢¢¢¢£¢¢¢¢¢££¢¢¢££¢¢¢¢¢¢¢¢¢¢¢¢¢¢¢¢¢£££££	676763477777600	BOV	1
1014	SB0854	¢¢£¢¢¢¢¢£¢¢¢¢¢££¢¢¢¢££¢¢¢¢¢¢¢¢¢¢£¢¢¢¢¢£££££	676763637767600	BOV	4
3704	SB1985	¢¢£¢¢¢¢¢£¢¢¢¢¢££¢¢¢¢£¢£¢¢£¢¢¢¢¢¢¢¢¢¢¢¢£££££	676763655777600	BOV	2
3575	SB1316	¢¢£¢¢¢¢¢£¢¢¢¢¢££¢¢¢¢£¢¢¢¢££££¢¢¢¢¢¢¢¢¢£££££	676763674177600	BOV	12
	SB1961	¢¢£¢¢¢¢¢£¢¢¢¢¢££¢¢¢¢£¢¢¢¢£¢¢¢¢¢¢¢¢¢¢£¢£££££	676763675777200	BOV	1
3538	SB0999	¢¢£¢¢¢¢¢£¢¢¢¢¢££¢¢¢¢£¢¢¢¢£¢¢¢¢¢¢¢¢¢¢¢¢£££££	676763675777600	BOV	26
3590	SB1364	¢¢£¢¢¢¢¢£¢¢¢¢¢££¢¢¢¢£¢¢¢¢¢££¢¢¢¢¢¢¢¢¢¢£££££	676763676377600	BOV	7
	SB1397	¢¢£¢¢¢¢¢£¢¢¢¢¢££¢¢¢¢£¢¢¢¢¢¢¢¢¢¢£¢¢¢¢¢¢£££££	676763677757600	BOV	1
	SB0521	¢¢£¢¢¢¢¢£¢¢¢¢¢££¢¢¢¢£¢¢¢¢¢¢¢¢¢¢¢¢¢£¢£¢£££££	676763677775200	BOV	1
	SB1636	¢¢£¢¢¢¢¢£¢¢¢¢¢££¢¢¢¢£¢¢¢¢¢¢¢¢¢¢¢¢¢£¢¢¢£££££	676763677775600	BOV	1
1668		¢¢£¢¢¢¢¢£¢¢¢¢¢££¢¢¢¢£¢¢¢¢¢¢¢¢¢¢¢¢¢¢££¢£££££	676763677776200	BOV	6
1669	SB2130	¢¢£¢¢¢¢¢£¢¢¢¢¢££¢¢¢¢£¢¢¢¢¢¢¢¢¢¢¢¢¢¢£¢¢£££££	676763677776600	BOV	4
3622	SB1282	¢¢£¢¢¢¢¢£¢¢¢¢¢££¢¢¢¢£¢¢¢¢¢¢¢¢¢¢¢¢¢¢¢£££££££	676763677777000	BOV	4
3631	SB1608	¢¢£¢¢¢¢¢£¢¢¢¢¢££¢¢¢¢£¢¢¢¢¢¢¢¢¢¢¢¢¢¢¢£¢£££££	676763677777200	BOV	4
819	SB1661	¢¢£¢¢¢¢¢£¢¢¢¢¢££¢¢¢¢£¢¢¢¢¢¢¢¢¢¢¢¢¢¢¢¢££££££	676763677777400	BOV	5
695	SB0119	¢¢£¢¢¢¢¢£¢¢¢¢¢££¢¢¢¢£¢¢¢¢¢¢¢¢¢¢¢¢¢¢¢¢¢£££££	676763677777600	BOV	294
		¢¢£¢¢¢¢¢£¢¢¢¢¢££¢¢¢¢¢¢¢¢¢¢£¢£££¢¢¢¢¢¢¢£££££	676763776437600	BOV	1
	SB1441	¢¢£¢¢¢¢¢£¢¢¢¢¢££¢¢¢¢¢¢¢¢¢¢£¢¢£¢¢¢¢¢¢¢¢£££££	676763776677600	BOV	1
3734	SB1430	¢¢£¢¢¢¢¢£¢¢¢¢¢££¢¢¢¢¢¢¢¢¢¢¢¢¢£¢¢¢¢£££¢£££££	676763777674200	BOV	3
3742	SB1439	¢¢£¢¢¢¢¢£¢¢¢¢¢££¢¢¢¢¢¢¢¢¢¢¢¢¢£¢¢¢¢¢¢¢¢£££££	676763777677600	BOV	4
		¢¢£¢¢¢¢¢£¢¢¢¢¢££¢¢¢¢¢¢¢¢¢¢¢¢¢¢¢£££¢¢¢¢£££££	676763777743600	BOV	1
3570	SB1204	¢¢£¢¢¢¢¢£¢¢¢¢¢££¢¢¢¢¢¢¢¢¢¢¢¢¢¢¢¢£¢¢¢¢¢£££££	676763777767600	BOV	12
3711	SB1648	¢¢£¢¢¢¢¢£¢¢¢¢¢££¢¢¢¢¢¢¢¢¢¢¢¢¢¢¢¢¢£¢¢¢¢£££££	676763777773600	BOV	3
		¢¢£¢¢¢¢¢£¢¢¢¢¢££¢¢¢¢¢¢¢¢¢¢¢¢¢¢¢¢¢¢££¢¢£££££	676763777774600	BOV	1
		¢¢£¢¢¢¢¢£¢¢¢¢¢££¢¢¢¢¢¢¢¢¢¢¢¢¢¢¢¢¢¢¢¢¢££££££	676763777777400	BOV	1
820	SB0856	¢¢£¢¢¢¢¢£¢¢¢¢¢££¢¢¢¢¢¢¢¢¢¢¢¢¢¢¢¢¢¢¢¢¢¢£££££	676763777777600	BOV	67
	SB2257	¢¢£¢¢¢¢¢£¢¢¢¢¢£¢¢¢¢¢¢¢¢¢¢¢¢¢¢¢¢¢¢¢¢¢¢¢£££££	676767777777600	BOV	1
3542	SB1401	¢¢£¢¢¢¢¢£¢¢¢¢¢¢££££££££££££££££££££££££££££	676770000000000	BOV	25
1015	SB0845	¢¢£¢¢¢¢¢£¢¢¢¢¢¢££££££¢¢¢¢¢¢¢¢¢¢¢¢¢¢¢¢¢£££££	676770077777600	BOV	5
		¢¢£¢¢¢¢¢£¢¢¢¢¢¢£££¢¢¢¢¢¢¢¢¢¢¢¢¢¢¢¢¢¢¢¢£££££	676770777777600	BOV	1
		¢¢£¢¢¢¢¢£¢¢¢¢¢¢££¢¢¢££££¢¢¢££¢¢¢¢¢¢¢¢¢£££££	676771607177600	BOV	1
3709	SB1381	¢¢£¢¢¢¢¢£¢¢¢¢¢¢££¢¢¢£¢¢¢¢¢¢¢¢¢¢¢¢¢¢¢¢¢£££££	676771677777600	BOV	2
	SB1063	¢¢£¢¢¢¢¢£¢¢¢¢¢¢££¢¢¢¢¢£¢¢¢¢¢¢¢¢¢¢¢¢¢¢¢£££££	676771757777600	BOV	1
	SB0540	¢¢£¢¢¢¢¢£¢¢¢¢¢¢££¢¢¢¢¢¢¢¢¢¢¢¢¢¢¢¢¢££¢¢£££££	676771777774600	BOV	1
	SB1169	¢¢£¢¢¢¢¢£¢¢¢¢¢¢££¢¢¢¢¢¢¢¢¢¢¢¢¢¢¢¢¢¢¢¢¢£££££	676771777777600	BOV	1
3524	SB1255	¢¢£¢¢¢¢¢£¢¢¢¢¢¢£¢£££££¢¢¢¢¢¢¢¢¢¢¢¢¢¢¢¢£££££	676772037777600	BOV_1	44
3525	SB1218	¢¢£¢¢¢¢¢£¢¢¢¢¢¢£¢££££¢¢¢¢¢¢¢¢¢¢¢¢¢¢¢¢¢£££££	676772077777600	BOV_1	42
3653	SB1665	¢¢£¢¢¢¢¢£¢¢¢¢¢¢£¢££¢£¢¢¢¢££££¢¢¢¢¢¢¢¢¢£££££	676772274177600	BOV_1	3
3518	SB1325	¢¢£¢¢¢¢¢£¢¢¢¢¢¢£¢££¢£¢¢¢¢¢¢¢¢¢¢¢¢¢¢¢¢¢£££££	676772277777600	BOV_1	55
1016	SB0826	¢¢£¢¢¢¢¢£¢¢¢¢¢¢£¢£¢¢¢¢¢¢¢¢¢¢¢¢¢¢£¢¢¢¢¢£££££	676772777767600	BOV_1	13
	SB0938	¢¢£¢¢¢¢¢£¢¢¢¢¢¢£¢¢££££££££££££££¢¢¢¢¢¢£££££	676773000017600	BOV_1	1
3680	SB1344	¢¢£¢¢¢¢¢£¢¢¢¢¢¢£¢¢£££££££££££££¢¢¢¢¢¢¢£££££	676773000037600	BOV_1	2
		¢¢£¢¢¢¢¢£¢¢¢¢¢¢£¢¢£££££££¢££££££¢¢¢¢¢¢£££££	676773002017600	BOV_1	1
1017	SB0863	¢¢£¢¢¢¢¢£¢¢¢¢¢¢£¢¢£££££¢¢¢¢¢¢¢£¢¢¢¢¢¢¢£££££	676773017737600	BOV_1	3
3740	SB1435	¢¢£¢¢¢¢¢£¢¢¢¢¢¢£¢¢££££¢¢¢¢¢¢¢£££¢£¢¢¢¢£££££	676773037613600	BOV_1	3
3582	SB1384	¢¢£¢¢¢¢¢£¢¢¢¢¢¢£¢¢££££¢¢¢¢¢¢¢¢¢¢¢¢¢¢¢¢£££££	676773037777600	BOV_1	9
3624	SB1290	¢¢£¢¢¢¢¢£¢¢¢¢¢¢£¢¢£¢£¢¢¢¢¢¢¢¢¢¢£¢¢¢¢¢¢£££££	676773277757600	BOV_1	4
1820	SB1059	¢¢£¢¢¢¢¢£¢¢¢¢¢¢£¢¢£¢£¢¢¢¢¢¢¢¢¢¢¢¢¢¢¢£¢£££££	676773277777200	BOV_1	5
3663	SB1064	¢¢£¢¢¢¢¢£¢¢¢¢¢¢£¢¢£¢£¢¢¢¢¢¢¢¢¢¢¢¢¢¢¢¢¢£££££	676773277777600	BOV_1	3
	SB1419	¢¢£¢¢¢¢¢£¢¢¢¢¢¢£¢¢£¢¢¢£¢¢¢¢¢¢£¢£¢¢¢¢¢¢£££££	676773357657600	BOV_1	1
3850	SB1929	¢¢£¢¢¢¢¢£¢¢¢¢¢¢£¢¢£¢¢¢¢¢¢¢¢¢¢¢£¢¢¢¢£¢¢£££££	676773377736600	BOV_1	2
3692	SB1669	¢¢£¢¢¢¢¢£¢¢¢¢¢¢£¢¢£¢¢¢¢¢¢¢¢¢¢¢¢£££££¢¢£££££	676773377740600	BOV_1	2
1018	SB0886	¢¢£¢¢¢¢¢£¢¢¢¢¢¢£¢¢£¢¢¢¢¢¢¢¢¢¢¢¢£¢¢¢¢¢¢£££££	676773377757600	BOV_1	109
1019	SB0870	¢¢£¢¢¢¢¢£¢¢¢¢¢¢£¢¢£¢¢¢¢¢¢¢¢¢¢¢¢¢¢¢¢¢¢¢£££££	676773377777600	BOV_1	7
	SB0898	¢¢£¢¢¢¢¢£¢¢¢¢¢¢£¢¢¢££££££¢££££££¢¢¢¢¢¢£££££	676773402017600	BOV_1	1
	SB1875	¢¢£¢¢¢¢¢£¢¢¢¢¢¢£¢¢¢£££££¢¢£££¢¢¢¢¢¢¢¢¢£££££	676773406177600	BOV_1	1
1020	SB0836	¢¢£¢¢¢¢¢£¢¢¢¢¢¢£¢¢¢££££¢¢¢¢¢¢¢¢¢¢¢¢¢¢¢£££££	676773417777600	BOV_1	7
3719	SB1103	¢¢£¢¢¢¢¢£¢¢¢¢¢¢£¢¢¢£££¢¢¢¢¢¢¢££¢¢¢¢¢¢¢£££££	676773437637600	BOV_1	3
3723	SB1102	¢¢£¢¢¢¢¢£¢¢¢¢¢¢£¢¢¢£££¢¢¢¢¢¢¢¢¢¢¢¢¢¢¢¢£££££	676773437777600	BOV_1	2
	SB1666	¢¢£¢¢¢¢¢£¢¢¢¢¢¢£¢¢¢££¢¢¢¢££££¢¢¢¢¢¢¢¢¢£££££	676773474177600	BOV_1	1
2630	SB1141	¢¢£¢¢¢¢¢£¢¢¢¢¢¢£¢¢¢££¢¢¢¢¢¢¢¢¢¢¢¢¢¢¢¢¢£££££	676773477777600	BOV_1	14
3710	SB1595	¢¢£¢¢¢¢¢£¢¢¢¢¢¢£¢¢¢£¢¢¢¢¢¢¢¢¢¢¢¢¢¢¢¢¢¢£££££	676773577777600	BOV_1	2
3632	SB1683	¢¢£¢¢¢¢¢£¢¢¢¢¢¢£¢¢¢¢££££¢¢¢¢¢¢¢¢¢¢¢¢¢¢£££££	676773607777600	BOV_1	4
3599	SB1649	¢¢£¢¢¢¢¢£¢¢¢¢¢¢£¢¢¢¢£££¢¢¢¢¢¢¢¢£££¢¢¢££££££	676773617743400	BOV_1	6
3523	SB1192	¢¢£¢¢¢¢¢£¢¢¢¢¢¢£¢¢¢¢£££¢¢¢¢¢¢¢¢£££¢¢¢¢£££££	676773617743600	BOV_1	44
3626	SB1352	¢¢£¢¢¢¢¢£¢¢¢¢¢¢£¢¢¢¢£££¢¢¢¢¢¢¢¢££¢¢¢¢¢£££££	676773617747600	BOV_1	4
	SB1342	¢¢£¢¢¢¢¢£¢¢¢¢¢¢£¢¢¢¢£££¢¢¢¢¢¢¢¢£¢¢¢¢¢¢£££££	676773617757600	BOV_1	1
	SB0941	¢¢£¢¢¢¢¢£¢¢¢¢¢¢£¢¢¢¢£££¢¢¢¢¢¢¢¢¢¢¢¢¢¢¢£££££	676773617777600	BOV_1	1
3634	SB1972	¢¢£¢¢¢¢¢£¢¢¢¢¢¢£¢¢¢¢££¢¢¢¢¢¢¢¢¢¢¢¢¢¢£¢£££££	676773637777200	BOV_1	4
3637	SB1090	¢¢£¢¢¢¢¢£¢¢¢¢¢¢£¢¢¢¢££¢¢¢¢¢¢¢¢¢¢¢¢¢¢¢¢£££££	676773637777600	BOV_1	5
3701	SB1962	¢¢£¢¢¢¢¢£¢¢¢¢¢¢£¢¢¢¢£¢£¢¢¢¢¢£¢¢¢¢¢¢¢¢¢£££££	676773657577600	BOV_1	2
	SB1965	¢¢£¢¢¢¢¢£¢¢¢¢¢¢£¢¢¢¢£¢£¢¢¢¢¢¢££¢¢¢¢¢¢¢£££££	676773657637600	BOV_1	1
	SB1973	¢¢£¢¢¢¢¢£¢¢¢¢¢¢£¢¢¢¢£¢£¢¢¢¢¢¢¢¢££¢¢¢£¢£££££	676773657747200	BOV_1	1
	SB2004	¢¢£¢¢¢¢¢£¢¢¢¢¢¢£¢¢¢¢£¢£¢¢¢¢¢¢¢¢¢¢¢££¢¢£££££	676773657774600	BOV_1	1
3703	SB1981	¢¢£¢¢¢¢¢£¢¢¢¢¢¢£¢¢¢¢£¢£¢¢¢¢¢¢¢¢¢¢¢¢¢£¢£££££	676773657777200	BOV_1	2
3511	SB1142	¢¢£¢¢¢¢¢£¢¢¢¢¢¢£¢¢¢¢£¢£¢¢¢¢¢¢¢¢¢¢¢¢¢¢¢£££££	676773657777600	BOV_1	117
3516	SB1258	¢¢£¢¢¢¢¢£¢¢¢¢¢¢£¢¢¢¢£¢¢£¢££££¢¢¢¢¢¢¢¢¢£££££	676773664177600	BOV_1	70
3672	SB1293	¢¢£¢¢¢¢¢£¢¢¢¢¢¢£¢¢¢¢£¢¢£¢¢£££¢¢¢¢¢¢¢¢¢£££££	676773666177600	BOV_1	2
3673	SB1295	¢¢£¢¢¢¢¢£¢¢¢¢¢¢£¢¢¢¢£¢¢£¢¢£¢¢£££¢¢¢¢¢¢£££££	676773666617600	BOV_1	2
422	SB0965	¢¢£¢¢¢¢¢£¢¢¢¢¢¢£¢¢¢¢£¢¢£¢¢¢¢¢¢¢¢¢¢¢¢¢¢£££££	676773667777600	BOV_1	9
3660	SB1967	¢¢£¢¢¢¢¢£¢¢¢¢¢¢£¢¢¢¢£¢¢¢££££££££¢¢¢¢£¢£££££	676773670017200	BOV_1	3
	SB1930	¢¢£¢¢¢¢¢£¢¢¢¢¢¢£¢¢¢¢£¢¢¢£¢£££££££££££££££££	676773672000000	BOV_1	1
	SB1673	¢¢£¢¢¢¢¢£¢¢¢¢¢¢£¢¢¢¢£¢¢¢¢££££££££££££¢£££££	676773674000200	BOV_1	1
	SB1806	¢¢£¢¢¢¢¢£¢¢¢¢¢¢£¢¢¢¢£¢¢¢¢££££££¢¢¢¢¢£¢£££££	676773674037200	BOV_1	1
		¢¢£¢¢¢¢¢£¢¢¢¢¢¢£¢¢¢¢£¢¢¢¢££££££¢¢¢¢¢¢££££££	676773674037400	BOV_1	1
1021	SB0881	¢¢£¢¢¢¢¢£¢¢¢¢¢¢£¢¢¢¢£¢¢¢¢££££££¢¢¢¢¢¢¢£££££	676773674037600	BOV_1	46
	SB1330	¢¢£¢¢¢¢¢£¢¢¢¢¢¢£¢¢¢¢£¢¢¢¢££££¢¢£££¢¢¢¢£££££	676773674143600	BOV_1	1
	SB1329	¢¢£¢¢¢¢¢£¢¢¢¢¢¢£¢¢¢¢£¢¢¢¢££££¢¢¢¢¢¢¢¢££££££	676773674177400	BOV_1	1
696	SB0339	¢¢£¢¢¢¢¢£¢¢¢¢¢¢£¢¢¢¢£¢¢¢¢££££¢¢¢¢¢¢¢¢¢£££££	676773674177600	BOV_1	1371
3668	SB1177	¢¢£¢¢¢¢¢£¢¢¢¢¢¢£¢¢¢¢£¢¢¢¢£££¢¢¢¢¢¢¢¢¢¢£££££	676773674377600	BOV_1	2
3589	SB1359	¢¢£¢¢¢¢¢£¢¢¢¢¢¢£¢¢¢¢£¢¢¢¢££¢¢¢¢¢¢¢¢¢¢¢£££££	676773674777600	BOV_1	8
		¢¢£¢¢¢¢¢£¢¢¢¢¢¢£¢¢¢¢£¢¢¢¢£¢¢¢¢¢¢£¢¢¢¢££££££	676773675767400	BOV_1	1
2631	SB0807	¢¢£¢¢¢¢¢£¢¢¢¢¢¢£¢¢¢¢£¢¢¢¢£¢¢¢¢¢¢¢¢¢¢¢¢£££££	676773675777600	BOV_1	8
3648	SB1380	¢¢£¢¢¢¢¢£¢¢¢¢¢¢£¢¢¢¢£¢¢¢¢¢£££££¢¢¢¢¢¢¢£££££	676773676037600	BOV_1	4
697	SB0132	¢¢£¢¢¢¢¢£¢¢¢¢¢¢£¢¢¢¢£¢¢¢¢¢£££¢¢¢¢¢¢¢¢¢£££££	676773676177600	BOV_1	30
3579	SB1651	¢¢£¢¢¢¢¢£¢¢¢¢¢¢£¢¢¢¢£¢¢¢¢¢£¢¢¢¢¢¢¢¢¢£¢£££££	676773676777200	BOV_1	10
3515	SB1337	¢¢£¢¢¢¢¢£¢¢¢¢¢¢£¢¢¢¢£¢¢¢¢¢¢£££¢¢¢¢¢¢¢¢£££££	676773677077600	BOV_1	73
	SB1149	¢¢£¢¢¢¢¢£¢¢¢¢¢¢£¢¢¢¢£¢¢¢¢¢¢££¢¢¢¢¢¢¢¢¢£££££	676773677177600	BOV_1	1
2129	SB1140	¢¢£¢¢¢¢¢£¢¢¢¢¢¢£¢¢¢¢£¢¢¢¢¢¢£¢¢¢¢¢¢¢¢£¢£££££	676773677377200	BOV_1	4
1847	SB1254	¢¢£¢¢¢¢¢£¢¢¢¢¢¢£¢¢¢¢£¢¢¢¢¢¢£¢¢¢¢¢¢¢¢¢¢£££££	676773677377600	BOV_1	20
	SB1769	¢¢£¢¢¢¢¢£¢¢¢¢¢¢£¢¢¢¢£¢¢¢¢¢¢¢£££££¢¢¢£¢£££££	676773677407200	BOV_1	1
3695	SB1677	¢¢£¢¢¢¢¢£¢¢¢¢¢¢£¢¢¢¢£¢¢¢¢¢¢¢£££¢¢¢¢¢¢¢£££££	676773677437600	BOV_1	2
	SB1988	¢¢£¢¢¢¢¢£¢¢¢¢¢¢£¢¢¢¢£¢¢¢¢¢¢¢£¢¢¢¢¢¢¢£¢£££££	676773677577200	BOV_1	1
3549	SB0296	¢¢£¢¢¢¢¢£¢¢¢¢¢¢£¢¢¢¢£¢¢¢¢¢¢¢£¢¢¢¢¢¢¢¢¢£££££	676773677577600	BOV_1	19
	SB1144	¢¢£¢¢¢¢¢£¢¢¢¢¢¢£¢¢¢¢£¢¢¢¢¢¢¢¢£££££££¢¢£££££	676773677600600	BOV_1	1
1816	SB1050	¢¢£¢¢¢¢¢£¢¢¢¢¢¢£¢¢¢¢£¢¢¢¢¢¢¢¢£££££¢¢¢¢£££££	676773677603600	BOV_1	3
	SB1335	¢¢£¢¢¢¢¢£¢¢¢¢¢¢£¢¢¢¢£¢¢¢¢¢¢¢¢££¢¢¢¢¢¢¢£££££	676773677637600	BOV_1	1
	SB1976	¢¢£¢¢¢¢¢£¢¢¢¢¢¢£¢¢¢¢£¢¢¢¢¢¢¢¢£¢¢¢¢¢¢£¢£££££	676773677677200	BOV_1	1
3539	SB1275	¢¢£¢¢¢¢¢£¢¢¢¢¢¢£¢¢¢¢£¢¢¢¢¢¢¢¢£¢¢¢¢¢¢¢¢£££££	676773677677600	BOV_1	25
3627	SB1369	¢¢£¢¢¢¢¢£¢¢¢¢¢¢£¢¢¢¢£¢¢¢¢¢¢¢¢¢££££¢¢¢¢£££££	676773677703600	BOV_1	5
3713	SB1681	¢¢£¢¢¢¢¢£¢¢¢¢¢¢£¢¢¢¢£¢¢¢¢¢¢¢¢¢£¢¢¢¢¢¢¢£££££	676773677737600	BOV_1	3
3586	SB1372	¢¢£¢¢¢¢¢£¢¢¢¢¢¢£¢¢¢¢£¢¢¢¢¢¢¢¢¢¢££££¢¢¢£££££	676773677741600	BOV_1	8
1022	SB0837	¢¢£¢¢¢¢¢£¢¢¢¢¢¢£¢¢¢¢£¢¢¢¢¢¢¢¢¢¢£££¢¢¢¢£££££	676773677743600	BOV_1	19
3478	SB0125	¢¢£¢¢¢¢¢£¢¢¢¢¢¢£¢¢¢¢£¢¢¢¢¢¢¢¢¢¢££¢¢¢¢¢£££££	676773677747600	BOV_1	7
3567	SB1313	¢¢£¢¢¢¢¢£¢¢¢¢¢¢£¢¢¢¢£¢¢¢¢¢¢¢¢¢¢£¢¢¢¢£¢£££££	676773677757200	BOV_1	15
1023	SB0559	¢¢£¢¢¢¢¢£¢¢¢¢¢¢£¢¢¢¢£¢¢¢¢¢¢¢¢¢¢£¢¢¢¢¢¢£££££	676773677757600	BOV_1	44
1024	SB0894	¢¢£¢¢¢¢¢£¢¢¢¢¢¢£¢¢¢¢£¢¢¢¢¢¢¢¢¢¢¢£££¢¢¢£££££	676773677761600	BOV_1	2
1025	SB0858	¢¢£¢¢¢¢¢£¢¢¢¢¢¢£¢¢¢¢£¢¢¢¢¢¢¢¢¢¢¢££¢¢¢¢£££££	676773677763600	BOV_1	8
3548	SB1346	¢¢£¢¢¢¢¢£¢¢¢¢¢¢£¢¢¢¢£¢¢¢¢¢¢¢¢¢¢¢£¢¢¢¢¢£££££	676773677767600	BOV_1	19
	SB1663	¢¢£¢¢¢¢¢£¢¢¢¢¢¢£¢¢¢¢£¢¢¢¢¢¢¢¢¢¢¢¢£££¢¢£££££	676773677770600	BOV_1	1
3619	SB1963	¢¢£¢¢¢¢¢£¢¢¢¢¢¢£¢¢¢¢£¢¢¢¢¢¢¢¢¢¢¢¢££¢£¢£££££	676773677771200	BOV_1	5
3541	SB1308	¢¢£¢¢¢¢¢£¢¢¢¢¢¢£¢¢¢¢£¢¢¢¢¢¢¢¢¢¢¢¢£¢¢¢¢£££££	676773677773600	BOV_1	26
	SB1328	¢¢£¢¢¢¢¢£¢¢¢¢¢¢£¢¢¢¢£¢¢¢¢¢¢¢¢¢¢¢¢¢£££¢£££££	676773677774200	BOV_1	1
1026	SB0869	¢¢£¢¢¢¢¢£¢¢¢¢¢¢£¢¢¢¢£¢¢¢¢¢¢¢¢¢¢¢¢¢££¢¢£££££	676773677774600	BOV_1	6
3651	SB1627	¢¢£¢¢¢¢¢£¢¢¢¢¢¢£¢¢¢¢£¢¢¢¢¢¢¢¢¢¢¢¢¢£¢£¢£££££	676773677775200	BOV_1	3
1027	SB0123	¢¢£¢¢¢¢¢£¢¢¢¢¢¢£¢¢¢¢£¢¢¢¢¢¢¢¢¢¢¢¢¢£¢¢¢£££££	676773677775600	BOV_1	2
3580	SB1672	¢¢£¢¢¢¢¢£¢¢¢¢¢¢£¢¢¢¢£¢¢¢¢¢¢¢¢¢¢¢¢¢¢££££££££	676773677776000	BOV_1	10
	SB1289	¢¢£¢¢¢¢¢£¢¢¢¢¢¢£¢¢¢¢£¢¢¢¢¢¢¢¢¢¢¢¢¢¢££¢£££££	676773677776200	BOV_1	1
3602	SB0967	¢¢£¢¢¢¢¢£¢¢¢¢¢¢£¢¢¢¢£¢¢¢¢¢¢¢¢¢¢¢¢¢¢£¢¢£££££	676773677776600	BOV_1	5
1028	SB0329	¢¢£¢¢¢¢¢£¢¢¢¢¢¢£¢¢¢¢£¢¢¢¢¢¢¢¢¢¢¢¢¢¢¢£££££££	676773677777000	BOV_1	93
698	SB0295	¢¢£¢¢¢¢¢£¢¢¢¢¢¢£¢¢¢¢£¢¢¢¢¢¢¢¢¢¢¢¢¢¢¢£¢£££££	676773677777200	BOV_1	949
1601	SB1021	¢¢£¢¢¢¢¢£¢¢¢¢¢¢£¢¢¢¢£¢¢¢¢¢¢¢¢¢¢¢¢¢¢¢¢££££££	676773677777400	BOV_1	58
481	SB0121	¢¢£¢¢¢¢¢£¢¢¢¢¢¢£¢¢¢¢£¢¢¢¢¢¢¢¢¢¢¢¢¢¢¢¢¢£££££	676773677777600	BOV_1	5338
	SB0913	¢¢£¢¢¢¢¢£¢¢¢¢¢¢£¢¢¢¢¢£££¢¢¢¢¢¢¢¢¢¢¢¢¢¢£££££	676773707777600	BOV_1	1
1029	SB0865	¢¢£¢¢¢¢¢£¢¢¢¢¢¢£¢¢¢¢¢£¢¢¢¢¢¢¢¢¢¢£¢¢£¢¢£££££	676773737766600	BOV_1	3
1030	SB0820	¢¢£¢¢¢¢¢£¢¢¢¢¢¢£¢¢¢¢¢£¢¢¢¢¢¢¢¢¢¢¢¢¢¢¢¢£££££	676773737777600	BOV_1	28
3184		¢¢£¢¢¢¢¢£¢¢¢¢¢¢£¢¢¢¢¢¢££¢¢¢¢¢¢¢¢¢¢¢¢¢¢£££££	676773747777600	BOV_1	2
	SB2404	¢¢£¢¢¢¢¢£¢¢¢¢¢¢£¢¢¢¢¢¢£¢¢¢¢¢¢¢¢¢£¢¢¢¢¢£££££	676773757767600	BOV_1	1
1181	SB1167	¢¢£¢¢¢¢¢£¢¢¢¢¢¢£¢¢¢¢¢¢£¢¢¢¢¢¢¢¢¢¢¢¢¢¢¢£££££	676773757777600	BOV_1	48
1031	SB0892	¢¢£¢¢¢¢¢£¢¢¢¢¢¢£¢¢¢¢¢¢¢£¢££££¢¢££¢¢£¢¢£££££	676773764146600	BOV_1	2
1854	SB0946	¢¢£¢¢¢¢¢£¢¢¢¢¢¢£¢¢¢¢¢¢¢¢££££££££££££¢¢£££££	676773770000600	BOV_1	3
1852	SB1139	¢¢£¢¢¢¢¢£¢¢¢¢¢¢£¢¢¢¢¢¢¢¢££££££££££¢¢¢¢£££££	676773770003600	BOV_1	5
	SB0259	¢¢£¢¢¢¢¢£¢¢¢¢¢¢£¢¢¢¢¢¢¢¢£¢££££££££££¢¢£££££	676773772000600	BOV_1	1
	SB1321	¢¢£¢¢¢¢¢£¢¢¢¢¢¢£¢¢¢¢¢¢¢¢¢£££££¢¢¢¢¢¢¢¢£££££	676773774077600	BOV_1	1
3675	SB1307	¢¢£¢¢¢¢¢£¢¢¢¢¢¢£¢¢¢¢¢¢¢¢¢££££¢¢¢¢¢¢¢¢¢£££££	676773774177600	BOV_1	2
	SB1148	¢¢£¢¢¢¢¢£¢¢¢¢¢¢£¢¢¢¢¢¢¢¢¢£££¢¢¢¢¢¢¢¢¢¢£££££	676773774377600	BOV_1	1
		¢¢£¢¢¢¢¢£¢¢¢¢¢¢£¢¢¢¢¢¢¢¢¢£¢¢¢¢¢¢¢¢¢¢£¢£££££	676773775777200	BOV_1	1
1032	SB0878	¢¢£¢¢¢¢¢£¢¢¢¢¢¢£¢¢¢¢¢¢¢¢¢¢££££££££¢¢¢¢£££££	676773776003600	BOV_1	4
3741	SB1438	¢¢£¢¢¢¢¢£¢¢¢¢¢¢£¢¢¢¢¢¢¢¢¢¢£££££¢¢¢¢¢¢¢£££££	676773776037600	BOV_1	3
3739	SB1436	¢¢£¢¢¢¢¢£¢¢¢¢¢¢£¢¢¢¢¢¢¢¢¢¢££££¢¢¢¢¢¢¢¢£££££	676773776077600	BOV_1	2
3725	SB1421	¢¢£¢¢¢¢¢£¢¢¢¢¢¢£¢¢¢¢¢¢¢¢¢¢££¢££¢¢¢¢¢¢¢£££££	676773776237600	BOV_1	6
2841	SB1420	¢¢£¢¢¢¢¢£¢¢¢¢¢¢£¢¢¢¢¢¢¢¢¢¢££¢£¢¢£££¢¢¢£££££	676773776261600	BOV_1	5
3738	SB1437	¢¢£¢¢¢¢¢£¢¢¢¢¢¢£¢¢¢¢¢¢¢¢¢¢££¢£¢¢¢¢££¢¢£££££	676773776274600	BOV_1	2
2838	SB1029	¢¢£¢¢¢¢¢£¢¢¢¢¢¢£¢¢¢¢¢¢¢¢¢¢££¢£¢¢¢¢¢£¢¢£££££	676773776276600	BOV_1	2
3721	SB1098	¢¢£¢¢¢¢¢£¢¢¢¢¢¢£¢¢¢¢¢¢¢¢¢¢££¢£¢¢¢¢¢¢¢££££££	676773776277400	BOV_1	2
2813	SB1027	¢¢£¢¢¢¢¢£¢¢¢¢¢¢£¢¢¢¢¢¢¢¢¢¢££¢£¢¢¢¢¢¢¢¢£££££	676773776277600	BOV_1	34
3735	SB1431	¢¢£¢¢¢¢¢£¢¢¢¢¢¢£¢¢¢¢¢¢¢¢¢¢£¢¢£££¢¢¢¢¢¢£££££	676773776617600	BOV_1	2
		¢¢£¢¢¢¢¢£¢¢¢¢¢¢£¢¢¢¢¢¢¢¢¢¢£¢¢££¢¢¢¢¢¢¢£££££	676773776637600	BOV_1	1
3732	SB1426	¢¢£¢¢¢¢¢£¢¢¢¢¢¢£¢¢¢¢¢¢¢¢¢¢£¢¢£¢¢¢¢¢¢¢¢£££££	676773776677600	BOV_1	2
3170	SB1565	¢¢£¢¢¢¢¢£¢¢¢¢¢¢£¢¢¢¢¢¢¢¢¢¢£¢¢¢¢¢¢¢¢¢¢¢£££££	676773776777600	BOV_1	6
	SB0924	¢¢£¢¢¢¢¢£¢¢¢¢¢¢£¢¢¢¢¢¢¢¢¢¢¢£££¢££¢£¢¢¢£££££	676773777045600	BOV_1	1
1033	SB0844	¢¢£¢¢¢¢¢£¢¢¢¢¢¢£¢¢¢¢¢¢¢¢¢¢¢£££¢¢¢¢£¢¢¢£££££	676773777075600	BOV_1	6
3621	SB0927	¢¢£¢¢¢¢¢£¢¢¢¢¢¢£¢¢¢¢¢¢¢¢¢¢¢£¢¢¢¢¢¢¢¢¢¢£££££	676773777377600	BOV_1	5
3848	SB1931	¢¢£¢¢¢¢¢£¢¢¢¢¢¢£¢¢¢¢¢¢¢¢¢¢¢¢££££££¢£¢¢£££££	676773777402600	BOV_1	2
	SB1166	¢¢£¢¢¢¢¢£¢¢¢¢¢¢£¢¢¢¢¢¢¢¢¢¢¢¢£££¢¢¢¢¢¢¢£££££	676773777437600	BOV_1	1
	SB1569	¢¢£¢¢¢¢¢£¢¢¢¢¢¢£¢¢¢¢¢¢¢¢¢¢¢¢££¢¢¢¢¢¢¢¢£££££	676773777477600	BOV_1	1
1637	SB1568	¢¢£¢¢¢¢¢£¢¢¢¢¢¢£¢¢¢¢¢¢¢¢¢¢¢¢£¢¢¢¢¢¢¢¢¢£££££	676773777577600	BOV_1	2
1034	SB0857	¢¢£¢¢¢¢¢£¢¢¢¢¢¢£¢¢¢¢¢¢¢¢¢¢¢¢¢£££££££¢¢£££££	676773777600600	BOV_1	3
3025	SB1025	¢¢£¢¢¢¢¢£¢¢¢¢¢¢£¢¢¢¢¢¢¢¢¢¢¢¢¢£££¢¢¢¢¢¢£££££	676773777617600	BOV_1	29
1035	SB0879	¢¢£¢¢¢¢¢£¢¢¢¢¢¢£¢¢¢¢¢¢¢¢¢¢¢¢¢££¢£¢¢¢¢¢£££££	676773777627600	BOV_1	2
	SB1454	¢¢£¢¢¢¢¢£¢¢¢¢¢¢£¢¢¢¢¢¢¢¢¢¢¢¢¢££¢¢¢¢¢£¢£££££	676773777637200	BOV_1	1
1036	SB0850	¢¢£¢¢¢¢¢£¢¢¢¢¢¢£¢¢¢¢¢¢¢¢¢¢¢¢¢££¢¢¢¢¢¢¢£££££	676773777637600	BOV_1	7
3731	SB1425	¢¢£¢¢¢¢¢£¢¢¢¢¢¢£¢¢¢¢¢¢¢¢¢¢¢¢¢£¢££¢¢¢¢££££££	676773777647400	BOV_1	2
3737	SB1433	¢¢£¢¢¢¢¢£¢¢¢¢¢¢£¢¢¢¢¢¢¢¢¢¢¢¢¢£¢£¢¢¢¢¢¢£££££	676773777657600	BOV_1	2
	SB1418	¢¢£¢¢¢¢¢£¢¢¢¢¢¢£¢¢¢¢¢¢¢¢¢¢¢¢¢£¢¢¢£¢¢¢¢£££££	676773777673600	BOV_1	1
	SB1453	¢¢£¢¢¢¢¢£¢¢¢¢¢¢£¢¢¢¢¢¢¢¢¢¢¢¢¢£¢¢¢¢££¢¢£££££	676773777674600	BOV_1	1
2842	SB0951	¢¢£¢¢¢¢¢£¢¢¢¢¢¢£¢¢¢¢¢¢¢¢¢¢¢¢¢£¢¢¢¢¢¢£¢£££££	676773777677200	BOV_1	18
1037	SB0944	¢¢£¢¢¢¢¢£¢¢¢¢¢¢£¢¢¢¢¢¢¢¢¢¢¢¢¢£¢¢¢¢¢¢¢¢£££££	676773777677600	BOV_1	141
2873	SB0960	¢¢£¢¢¢¢¢£¢¢¢¢¢¢£¢¢¢¢¢¢¢¢¢¢¢¢¢¢£££££££¢£££££	676773777700200	BOV_1	2
	SB0930	¢¢£¢¢¢¢¢£¢¢¢¢¢¢£¢¢¢¢¢¢¢¢¢¢¢¢¢¢££¢¢¢¢¢¢£££££	676773777717600	BOV_1	1
1038		¢¢£¢¢¢¢¢£¢¢¢¢¢¢£¢¢¢¢¢¢¢¢¢¢¢¢¢¢£¢¢¢£¢¢¢£££££	676773777735600	BOV_1	8
1039	SB0860	¢¢£¢¢¢¢¢£¢¢¢¢¢¢£¢¢¢¢¢¢¢¢¢¢¢¢¢¢£¢¢¢¢£¢¢£££££	676773777736600	BOV_1	4
1040	SB0833	¢¢£¢¢¢¢¢£¢¢¢¢¢¢£¢¢¢¢¢¢¢¢¢¢¢¢¢¢£¢¢¢¢¢¢¢£££££	676773777737600	BOV_1	38
	SB0921	¢¢£¢¢¢¢¢£¢¢¢¢¢¢£¢¢¢¢¢¢¢¢¢¢¢¢¢¢¢££££££¢£££££	676773777740200	BOV_1	1
1041	SB0831	¢¢£¢¢¢¢¢£¢¢¢¢¢¢£¢¢¢¢¢¢¢¢¢¢¢¢¢¢¢£££¢¢¢¢£££££	676773777743600	BOV_1	12
	SB0907	¢¢£¢¢¢¢¢£¢¢¢¢¢¢£¢¢¢¢¢¢¢¢¢¢¢¢¢¢¢££¢¢¢£££££££	676773777747000	BOV_1	1
1730	SB1893	¢¢£¢¢¢¢¢£¢¢¢¢¢¢£¢¢¢¢¢¢¢¢¢¢¢¢¢¢¢££¢¢¢¢¢£££££	676773777747600	BOV_1	6
1042	SB0839	¢¢£¢¢¢¢¢£¢¢¢¢¢¢£¢¢¢¢¢¢¢¢¢¢¢¢¢¢¢£¢£¢¢¢¢£££££	676773777753600	BOV_1	8
	SB0838	¢¢£¢¢¢¢¢£¢¢¢¢¢¢£¢¢¢¢¢¢¢¢¢¢¢¢¢¢¢£¢¢¢¢¢¢£££££	676773777757600	BOV_1	1
3747	SB1476	¢¢£¢¢¢¢¢£¢¢¢¢¢¢£¢¢¢¢¢¢¢¢¢¢¢¢¢¢¢¢£££££¢£££££	676773777760200	BOV_1	32
		¢¢£¢¢¢¢¢£¢¢¢¢¢¢£¢¢¢¢¢¢¢¢¢¢¢¢¢¢¢¢£¢££¢¢£££££	676773777764600	BOV_1	1
1043	SB0843	¢¢£¢¢¢¢¢£¢¢¢¢¢¢£¢¢¢¢¢¢¢¢¢¢¢¢¢¢¢¢£¢¢£¢¢£££££	676773777766600	BOV_1	6
	SB0918	¢¢£¢¢¢¢¢£¢¢¢¢¢¢£¢¢¢¢¢¢¢¢¢¢¢¢¢¢¢¢£¢¢¢¢££££££	676773777767400	BOV_1	1
1044	SB0818	¢¢£¢¢¢¢¢£¢¢¢¢¢¢£¢¢¢¢¢¢¢¢¢¢¢¢¢¢¢¢£¢¢¢¢¢£££££	676773777767600	BOV_1	103
1045	SB0040	¢¢£¢¢¢¢¢£¢¢¢¢¢¢£¢¢¢¢¢¢¢¢¢¢¢¢¢¢¢¢¢£££¢¢£££££	676773777770600	BOV_1	7
1046	SB0842	¢¢£¢¢¢¢¢£¢¢¢¢¢¢£¢¢¢¢¢¢¢¢¢¢¢¢¢¢¢¢¢££¢¢¢£££££	676773777771600	BOV_1	5
1047	SB0828	¢¢£¢¢¢¢¢£¢¢¢¢¢¢£¢¢¢¢¢¢¢¢¢¢¢¢¢¢¢¢¢£¢¢¢¢£££££	676773777773600	BOV_1	76
	SB1231	¢¢£¢¢¢¢¢£¢¢¢¢¢¢£¢¢¢¢¢¢¢¢¢¢¢¢¢¢¢¢¢¢££¢¢£££££	676773777774600	BOV_1	1
1048	SB0829	¢¢£¢¢¢¢¢£¢¢¢¢¢¢£¢¢¢¢¢¢¢¢¢¢¢¢¢¢¢¢¢¢£¢¢¢£££££	676773777775600	BOV_1	10
	SB1571	¢¢£¢¢¢¢¢£¢¢¢¢¢¢£¢¢¢¢¢¢¢¢¢¢¢¢¢¢¢¢¢¢¢££¢£££££	676773777776200	BOV_1	1
3754	SB0934	¢¢£¢¢¢¢¢£¢¢¢¢¢¢£¢¢¢¢¢¢¢¢¢¢¢¢¢¢¢¢¢¢¢£¢¢£££££	676773777776600	BOV_1	4
3755	SB0560	¢¢£¢¢¢¢¢£¢¢¢¢¢¢£¢¢¢¢¢¢¢¢¢¢¢¢¢¢¢¢¢¢¢¢£££££££	676773777777000	BOV_1	2
797	SB0852	¢¢£¢¢¢¢¢£¢¢¢¢¢¢£¢¢¢¢¢¢¢¢¢¢¢¢¢¢¢¢¢¢¢¢£¢£££££	676773777777200	BOV_1	4
482	SB0120	¢¢£¢¢¢¢¢£¢¢¢¢¢¢£¢¢¢¢¢¢¢¢¢¢¢¢¢¢¢¢¢¢¢¢¢¢£££££	676773777777600	BOV_1	1661
		¢¢£¢¢¢¢¢£¢¢¢¢¢¢¢¢£¢¢¢¢¢¢¢¢¢¢¢¢¢¢¢¢¢¢¢¢£££££	676776777777600	BOV	1
		¢¢£¢¢¢¢¢£¢¢¢¢¢¢¢¢¢¢¢£¢¢¢£¢¢¢¢¢¢¢¢¢¢¢¢¢£££££	676777673777600	BOV	1
	SB0591	¢¢£¢¢¢¢¢£¢¢¢¢¢¢¢¢¢¢¢£¢¢¢¢¢¢¢¢¢¢¢¢¢¢¢£¢£££££	676777677777200	BOV	1
1440	SB2357	¢¢£¢¢¢¢¢£¢¢¢¢¢¢¢¢¢¢¢£¢¢¢¢¢¢¢¢¢¢¢¢¢¢¢¢¢£££££	676777677777600	BOV	8
		¢¢£¢¢¢¢¢£¢¢¢¢¢¢¢¢¢¢¢¢¢£¢¢¢¢¢¢¢¢¢¢¢¢¢¢¢£££££	676777757777600	BOV	1
595	SB2220	¢¢£¢¢¢¢¢£¢¢¢¢¢¢¢¢¢¢¢¢¢¢¢¢¢¢¢¢¢¢¢¢¢¢¢¢¢£££££	676777777777600	BOV	5
3090		¢¢£¢¢¢¢¢¢¢¢¢¢¢¢£¢¢¢¢¢¢¢¢¢¢¢¢¢¢¢¢¢¢¢¢¢¢£££££	677773777777600	BOV	2
