# Supplementary material for: SITVITBovis—a publicly available database and mapping tool to get an improved overview of animal and human cases caused by Mycobacterium bovis
Source: Database (Oxford). 2022 Jan 13;2022:baab081. doi: 10.1093/database/baab081 (PMC8962452; doi:10.1093/database/baab081)
Supplement: baab081_Supp [file baab081_supp.zip › Supplementary_Table_S3_WGS_SRA_Bovis_data_with_country.xls]

## Sheet: Feuil1
Supplementary Table S3: preliminary table linking WGS and classical genotyping data for 188 bTB isolates.
#ID	Spoligotype (SpoTyping)	Spoligo (octal)	24-loci MIRU-VNTR	15-loci MIRU-VNTR	12-loci MIRU-VNTR	Lineage (SpolLineages)	Spoligotype International Type (SIT)	SBnumber (Mbovis)	Resistance (TBProfiler)	Lineage (TBProfiler)	Coll2014	Freschi2020	Lipworth2019	Shitikov2017	Stucki2016	Release_Date	Bases (bp)	TaxonomyID	Scientific_Name (or species)	Center_Name	Consent	Country	Library_Strategy	Library_Selection	Library_Source	Library_Layout	Platform	Model
SRR13015794	1101111101111110111101111111111111110100000	676773677777200	222413252322445231144442	224532452311442	222413252322	BOV_1	698	SB0295	Drug-resistant: Pyrazinamide (R)	lineageBOV	lineage4.9	4.2.1.1.1.1.1.1.i2	bovis	NA	4.10/PGG3	2021-03-01 00:10:45	484276812	1765	Mycobacterium tuberculosis variant bovis	EMBRAPA BEEF CATTLE ()	public	Brazil	WGS	PCR	GENOMIC	PAIRED	ILLUMINA	Illumina HiSeq 2500
SRR13015795	1101111101111110111101111111111111110100000	676773677777200	222333152324145231454332	223534152314532	222333152324	BOV_1	698	SB0295	Drug-resistant: Pyrazinamide (R)	lineageBOV	lineage4.9	4.2.1.1.1.1.1.1.i2	bovis	NA	4.10/PGG3	2021-03-01 00:10:45	485490250	1765	Mycobacterium tuberculosis variant bovis	EMBRAPA BEEF CATTLE ()	public	Brazil	WGS	PCR	GENOMIC	PAIRED	ILLUMINA	Illumina HiSeq 2500
SRR13015796	1101111101111110111101111111111111110100000	676773677777200	222335253322445221343442	223532452213442	222335253322	BOV_1	698	SB0295	Drug-resistant: Pyrazinamide (R)	lineageBOV	lineage4.9	4.2.1.1.1.1.1.1.i2	bovis	NA	4.10/PGG3	2021-03-01 00:10:45	571607344	1765	Mycobacterium tuberculosis variant bovis	EMBRAPA BEEF CATTLE ()	public	Brazil	WGS	PCR	GENOMIC	PAIRED	ILLUMINA	Illumina HiSeq 2500
SRR13015797	1101111101111110111101111111111111110100000	676773677777200	222523353323445221343432	225533452213442	222523353323	BOV_1	698	SB0295	Drug-resistant: Pyrazinamide (R)	lineageBOV	lineage4.9	4.2.1.1.1.1.1.1.i2	bovis	NA	4.10/PGG3	2021-03-01 00:10:45	663540195	1765	Mycobacterium tuberculosis variant bovis	EMBRAPA BEEF CATTLE ()	public	Brazil	WGS	PCR	GENOMIC	PAIRED	ILLUMINA	Illumina HiSeq 2500
SRR13015798	1101111101111110111101111111111111110100000	676773677777200	222525353324445231344442	225534452313442	222525353324	BOV_1	698	SB0295	Drug-resistant: Pyrazinamide (R)	lineageBOV	lineage4.9	4.2.1.1.1.1.1.1.i2	bovis	NA	4.10/PGG3	2021-03-01 00:10:45	497372971	1765	Mycobacterium tuberculosis variant bovis	EMBRAPA BEEF CATTLE ()	public	Brazil	WGS	PCR	GENOMIC	PAIRED	ILLUMINA	Illumina HiSeq 2500
SRR13015799	1101111101111110111101111111111111110100000	676773677777200	222435452323455231454442	224533452314542	222435452323	BOV_1	698	SB0295	Drug-resistant: Pyrazinamide (R)	lineageBOV	lineage4.9	4.2.1.1.1.1.1.1.i2	bovis	NA	4.10/PGG3	2021-03-01 00:10:45	481854027	1765	Mycobacterium tuberculosis variant bovis	EMBRAPA BEEF CATTLE ()	public	Brazil	WGS	PCR	GENOMIC	PAIRED	ILLUMINA	Illumina HiSeq 2500
SRR13015800	1101111101111110111101111111111111110100000	676773677777200	222526354323446231454342	225533462314532	222526354323	BOV_1	698	SB0295	Drug-resistant: Pyrazinamide (R)	lineageBOV	lineage4.9	4.2.1.1.1.1.1.1.i2	bovis	NA	4.10/PGG3	2021-03-01 00:10:45	433453504	1765	Mycobacterium tuberculosis variant bovis	EMBRAPA BEEF CATTLE ()	public	Brazil	WGS	PCR	GENOMIC	PAIRED	ILLUMINA	Illumina HiSeq 2500
SRR13015801	1101111101111110111101111111111111110100000	676773677777200	232523353321445231344422	325531452313442	232523353321	BOV_1	698	SB0295	Drug-resistant: Pyrazinamide (R)	lineageBOV	lineage4.9	4.2.1.1.1.1.1.1.i2	bovis	NA	4.10/PGG3	2021-03-01 00:10:45	486091395	1765	Mycobacterium tuberculosis variant bovis	EMBRAPA BEEF CATTLE ()	public	Brazil	WGS	PCR	GENOMIC	PAIRED	ILLUMINA	Illumina HiSeq 2500
SRR13015802	1101111101111110111101111111111111110100000	676773677777200	232435352424145221344422	324544152213442	232435352424	BOV_1	698	SB0295	Drug-resistant: Pyrazinamide (R)	lineageBOV	lineage4.9	4.2.1.1.1.1.1.1.i2	bovis	NA	4.10/PGG3	2021-03-01 00:10:45	520472997	1765	Mycobacterium tuberculosis variant bovis	EMBRAPA BEEF CATTLE ()	public	Brazil	WGS	PCR	GENOMIC	PAIRED	ILLUMINA	Illumina HiSeq 2500
SRR13015803	1101111101111110111101111111111111110100000	676773677777200	232325153422445221345422	323542452213442	232325153422	BOV_1	698	SB0295	Drug-resistant: Pyrazinamide (R)	lineageBOV	lineage4.9	4.2.1.1.1.1.1.1.i2	bovis	NA	4.10/PGG3	2021-03-01 00:10:45	460961632	1765	Mycobacterium tuberculosis variant bovis	EMBRAPA BEEF CATTLE ()	public	Brazil	WGS	PCR	GENOMIC	PAIRED	ILLUMINA	Illumina HiSeq 2500
SRR13015804	1101111101111110111101111111111111110100000	676773677777200	232433462523246231553532	324653262315552	232433462523	BOV_1	698	SB0295	Drug-resistant: Pyrazinamide (R)	lineageBOV	lineage4.9	4.2.1.1.1.1.1.1.i2	bovis	NA	4.10/PGG3	2021-03-01 00:10:45	434536243	1765	Mycobacterium tuberculosis variant bovis	EMBRAPA BEEF CATTLE ()	public	Brazil	WGS	PCR	GENOMIC	PAIRED	ILLUMINA	Illumina HiSeq 2500
SRR13015805	1101111101111110111101111111111111110100000	676773677777200	232425354324445231344442	324534452313442	232425354324	BOV_1	698	SB0295	Drug-resistant: Pyrazinamide (R)	lineageBOV	lineage4.9	4.2.1.1.1.1.1.1.i2	bovis	NA	4.10/PGG3	2021-03-01 00:10:45	481907128	1765	Mycobacterium tuberculosis variant bovis	EMBRAPA BEEF CATTLE ()	public	Brazil	WGS	PCR	GENOMIC	PAIRED	ILLUMINA	Illumina HiSeq 2500
SRR13015806	1101111101111110111101111111111111111100000	676773677777600	232525153323445331444542	325533453314452	232525153323	BOV_1	481	SB0121	Drug-resistant: Pyrazinamide (R)	lineageBOV	lineage4.9	4.2.1.1.1.1.1.1.i2	bovis	NA	4.10/PGG3	2021-03-01 00:10:45	487636113	1765	Mycobacterium tuberculosis variant bovis	EMBRAPA BEEF CATTLE ()	public	Brazil	WGS	PCR	GENOMIC	PAIRED	ILLUMINA	Illumina HiSeq 2500
SRR13015807	1101111101111110111101111111111111110100000	676773677777200	232533354323445331422242	325533453314222	232533354323	BOV_1	698	SB0295	Drug-resistant: Pyrazinamide (R)	lineageBOV	lineage4.9	4.2.1.1.1.1.1.1.i2	bovis	NA	4.10/PGG3	2021-03-01 00:10:45	395042705	1765	Mycobacterium tuberculosis variant bovis	EMBRAPA BEEF CATTLE ()	public	Brazil	WGS	PCR	GENOMIC	PAIRED	ILLUMINA	Illumina HiSeq 2500
SRR13015808	1101111101111110111101111111111111110100000	676773677777200	232433152524415231255552	324554452312552	232433152524	BOV_1	698	SB0295	Drug-resistant: Pyrazinamide (R)	lineageBOV	lineage4.9	4.2.1.1.1.1.1.1.i2	bovis	NA	4.10/PGG3	2021-03-01 00:10:44	420031657	1765	Mycobacterium tuberculosis variant bovis	EMBRAPA BEEF CATTLE ()	public	Brazil	WGS	PCR	GENOMIC	PAIRED	ILLUMINA	Illumina HiSeq 2500
SRR13015809	1101111101111110111101111111111111110100000	676773677777200	222424143322422-31343432	22443242-313442	222424143322	BOV_1	698	SB0295	Drug-resistant: Pyrazinamide (R)	lineageBOV;lineage4.1.1.1	lineage4.9	4.2.1.1.1.1.1.1.i2	bovis	NA	4.10/PGG3	2021-03-01 00:10:44	307716611	1765	Mycobacterium tuberculosis variant bovis	EMBRAPA BEEF CATTLE ()	public	Brazil	WGS	PCR	GENOMIC	PAIRED	ILLUMINA	Illumina HiSeq 2500
SRR13015810	1101111101111110111101111111111111110100000	676773677777200	222413243322445321342422	224432453213442	222413243322	BOV_1	698	SB0295	Drug-resistant: Pyrazinamide (R)	lineageBOV	lineage4.9	4.2.1.1.1.1.1.1.i2	bovis	NA	4.10/PGG3	2021-03-01 00:10:44	504834107	1765	Mycobacterium tuberculosis variant bovis	EMBRAPA BEEF CATTLE ()	public	Brazil	WGS	PCR	GENOMIC	PAIRED	ILLUMINA	Illumina HiSeq 2500
SRR13046668	1100111101111110111111111111111111111100000	636773777777600	232524451223-452214-4321	325523-52214-31	232524451223	BOV_1	997	SB0822	Drug-resistant: Pyrazinamide (R)	lineageBOV	lineage4.9	4.2.1.1.1.1.1.1.i2	bovis	NA	4.10/PGG3	2020-11-19 11:23:40	457115078	1765	Mycobacterium tuberculosis variant bovis	EMBRAPA BEEF CATTLE ()	public	Brazil	WGS	PCR	GENOMIC	PAIRED	ILLUMINA	Illumina HiSeq 2500
SRR13046669	1101111101111110111101111111111111110100000	676773677777200	222335262323355331342542	223633353313452	222335262323	BOV_1	698	SB0295	Drug-resistant: Pyrazinamide (R)	lineageBOV	lineage4.9	4.2.1.1.1.1.1.1.i2	bovis	NA	4.10/PGG3	2020-11-19 11:23:40	367390669	1765	Mycobacterium tuberculosis variant bovis	EMBRAPA BEEF CATTLE ()	public	Brazil	WGS	PCR	GENOMIC	PAIRED	ILLUMINA	Illumina HiSeq 2500
SRR13046670	1100111101111110111111111111111111111100000	636773777777600	232336151222-562214-3252	323522-62214-22	232336151222	BOV_1	997	SB0822	Drug-resistant: Pyrazinamide (R)	lineageBOV	lineage4.9	4.2.1.1.1.1.1.1.i2	bovis	NA	4.10/PGG3	2020-11-19 11:23:40	503585016	1765	Mycobacterium tuberculosis variant bovis	EMBRAPA BEEF CATTLE ()	public	Brazil	WGS	PCR	GENOMIC	PAIRED	ILLUMINA	Illumina HiSeq 2500
SRR13046671	1001111101111110111101111111111111110100000	476773677777200	232414353324425231444242	324534452314422	232414353324	BOV	3510	SB1190	Drug-resistant: Pyrazinamide (R)	lineageBOV	lineage4.9	4.2.1.1.1.1.1.1.i2	bovis	NA	4.10/PGG3	2020-11-19 11:23:40	476636488	1765	Mycobacterium tuberculosis variant bovis	EMBRAPA BEEF CATTLE ()	public	Brazil	WGS	PCR	GENOMIC	PAIRED	ILLUMINA	Illumina HiSeq 2500
SRR13046672	1100111101111110111111111111111111111100000	636773777777600	232433151221-563314-5232	324521-63314-22	232433151221	BOV_1	997	SB0822	Drug-resistant: Pyrazinamide (R)	lineageBOV	lineage4.9	4.2.1.1.1.1.1.1.i2	bovis	NA	4.10/PGG3	2020-11-19 11:23:40	388217082	1765	Mycobacterium tuberculosis variant bovis	EMBRAPA BEEF CATTLE ()	public	Brazil	WGS	PCR	GENOMIC	PAIRED	ILLUMINA	Illumina HiSeq 2500
SRR13046673	1101111101111110111101111111111111110100000	676773677777200	232426154323442231354242	324533422313522	232426154323	BOV_1	698	SB0295	Drug-resistant: Pyrazinamide (R)	lineageBOV	lineage4.9	4.2.1.1.1.1.1.1.i2	bovis	NA	4.10/PGG3	2020-11-19 11:23:40	599007951	1765	Mycobacterium tuberculosis variant bovis	EMBRAPA BEEF CATTLE ()	public	Brazil	WGS	PCR	GENOMIC	PAIRED	ILLUMINA	Illumina HiSeq 2500
SRR13046674	1101111101111110111101111111111111110100000	676773677777200	232325153422443231344422	323542432313442	232325153422	BOV_1	698	SB0295	Drug-resistant: Pyrazinamide (R)	lineageBOV	lineage4.9	4.2.1.1.1.1.1.1.i2	bovis	NA	4.10/PGG3	2020-11-19 11:23:40	634733142	1765	Mycobacterium tuberculosis variant bovis	EMBRAPA BEEF CATTLE ()	public	Brazil	WGS	PCR	GENOMIC	PAIRED	ILLUMINA	Illumina HiSeq 2500
SRR13046675	1001011101111110111111111111111011111100000	456773777757600	222323342322344321012-32	2234323432101-2	222323342322	BOV	Orphan	SB1800	Drug-resistant: Pyrazinamide (R)	lineageBOV	lineage4.9	4.2.1.1.1.1.1.1.i2	NA	NA	4.10/PGG3	2020-11-19 11:23:40	101475631	1765	Mycobacterium tuberculosis variant bovis	EMBRAPA BEEF CATTLE ()	public	Brazil	WGS	PCR	GENOMIC	PAIRED	ILLUMINA	Illumina HiSeq 2500
SRR13046676	1100111101111110111111111111111111111100000	636773777777600	232423141223-452211-2422	324423-52211-42	232423141223	BOV_1	997	SB0822	Drug-resistant: Pyrazinamide (R)	lineageBOV	lineage4.9	4.2.1.1.1.1.1.1.i2	bovis	NA	4.10/PGG3	2020-11-19 11:23:40	450924859	1765	Mycobacterium tuberculosis variant bovis	EMBRAPA BEEF CATTLE ()	public	Brazil	WGS	PCR	GENOMIC	PAIRED	ILLUMINA	Illumina HiSeq 2500
SRR13046677	1101111101111110111101111111111111110100000	676773677777200	232423252322442221344422	324532422213442	232423252322	BOV_1	698	SB0295	Drug-resistant: Pyrazinamide (R)	lineageBOV	lineage4.9	4.2.1.1.1.1.1.1.i2	bovis	NA	4.10/PGG3	2020-11-19 11:23:40	650782074	1765	Mycobacterium tuberculosis variant bovis	EMBRAPA BEEF CATTLE ()	public	Brazil	WGS	PCR	GENOMIC	PAIRED	ILLUMINA	Illumina HiSeq 2500
SRR13046678	1100111101111110111111111111111111111100000	636773777777600	232423351224-562314-5522	324524-62314-52	232423351224	BOV_1	997	SB0822	Drug-resistant: Pyrazinamide (R)	lineageBOV	lineage4.9	4.2.1.1.1.1.1.1.i2	bovis	NA	4.10/PGG3	2020-11-19 11:23:40	478126436	1765	Mycobacterium tuberculosis variant bovis	EMBRAPA BEEF CATTLE ()	public	Brazil	WGS	PCR	GENOMIC	PAIRED	ILLUMINA	Illumina HiSeq 2500
SRR13046679	1100111101111110111111111111111111111100000	636773777777600	232423341222-452212-2442	324422-52212-42	232423341222	BOV_1	997	SB0822	Drug-resistant: Pyrazinamide (R)	lineageBOV	lineage4.9	4.2.1.1.1.1.1.1.i2	bovis	NA	4.10/PGG3	2020-11-19 11:23:40	517876737	1765	Mycobacterium tuberculosis variant bovis	EMBRAPA BEEF CATTLE ()	public	Brazil	WGS	PCR	GENOMIC	PAIRED	ILLUMINA	Illumina HiSeq 2500
SRR13046680	1101111101111110111101111111111111110100000	676773677777200	232423354322442221444342	324532422214432	232423354322	BOV_1	698	SB0295	Drug-resistant: Pyrazinamide (R)	lineageBOV	lineage4.9	4.2.1.1.1.1.1.1.i2	bovis	NA	4.10/PGG3	2020-11-19 11:23:40	496588538	1765	Mycobacterium tuberculosis variant bovis	EMBRAPA BEEF CATTLE ()	public	Brazil	WGS	PCR	GENOMIC	PAIRED	ILLUMINA	Illumina HiSeq 2500
SRR13046681	1100111101111110111111111111111111111100000	636773777777600	232325451223-552214-2442	323523-52214-42	232325451223	BOV_1	997	SB0822	Drug-resistant: Pyrazinamide (R)	lineageBOV	lineage4.9	4.2.1.1.1.1.1.1.i2	bovis	NA	4.10/PGG3	2020-11-19 11:23:40	600866763	1765	Mycobacterium tuberculosis variant bovis	EMBRAPA BEEF CATTLE ()	public	Brazil	WGS	PCR	GENOMIC	PAIRED	ILLUMINA	Illumina HiSeq 2500
SRR13046682	1001011101111110111111111111111011111100000	456773777757600	232225354322256231012432	322532262310142	232225354322	BOV	Orphan	SB1800	Drug-resistant: Pyrazinamide (R)	lineageBOV	lineage4.9	4.2.1.1.1.1.1.1.i2	NA	NA	4.10/PGG3	2020-11-19 11:23:40	470623250	1765	Mycobacterium tuberculosis variant bovis	EMBRAPA BEEF CATTLE ()	public	Brazil	WGS	PCR	GENOMIC	PAIRED	ILLUMINA	Illumina HiSeq 2500
SRR13046683	1101111101111110111101111111111111111100000	676773677777600	222324343323344221244432	223433342212442	222324343323	BOV_1	481	SB0121	Drug-resistant: Pyrazinamide (R)	lineageBOV	lineage4.9	4.2.1.1.1.1.1.1.i2	bovis	NA	4.10/PGG3	2020-11-19 11:23:40	634332976	1765	Mycobacterium tuberculosis variant bovis	EMBRAPA BEEF CATTLE ()	public	Brazil	WGS	PCR	GENOMIC	PAIRED	ILLUMINA	Illumina HiSeq 2500
SRR13046684	1100111101111110111111111111111111111100000	636773777777600				BOV_1	997	SB0822	Drug-resistant: Pyrazinamide (R)	lineageBOV	lineage4.9	4.2.1.1.1.1.1.1.i2	bovis	NA	4.10/PGG3	2020-11-19 11:23:40	616405171	1765	Mycobacterium tuberculosis variant bovis	EMBRAPA BEEF CATTLE ()	public	Brazil	WGS	PCR	GENOMIC	PAIRED	ILLUMINA	Illumina HiSeq 2500
SRR13046685	1100111101111110111111111111111111111100000	636773777777600	232323141223-452212-2342	323423-52212-32	232323141223	BOV_1	997	SB0822	Drug-resistant: Pyrazinamide (R)	lineageBOV	lineage4.9	4.2.1.1.1.1.1.1.i2	bovis	NA	4.10/PGG3	2020-11-19 11:23:40	646001171	1765	Mycobacterium tuberculosis variant bovis	EMBRAPA BEEF CATTLE ()	public	Brazil	WGS	PCR	GENOMIC	PAIRED	ILLUMINA	Illumina HiSeq 2500
SRR13046686	1101111101111110111101111111111111110100000	676773677777200	232513453322444231355222	325532442313522	232513453322	BOV_1	698	SB0295	Drug-resistant: Pyrazinamide (R)	lineageBOV	lineage4.9	4.2.1.1.1.1.1.1.i2	bovis	NA	4.10/PGG3	2020-11-19 11:23:40	443859177	1765	Mycobacterium tuberculosis variant bovis	EMBRAPA BEEF CATTLE ()	public	Brazil	WGS	PCR	GENOMIC	PAIRED	ILLUMINA	Illumina HiSeq 2500
SRR13046687	1001111101111110111101111111111111110100000	476773677777200	232423343423235221342422	324443252213442	232423343423	BOV	3510	SB1190	Drug-resistant: Pyrazinamide (R)	lineageBOV	lineage4.9	4.2.1.1.1.1.1.1.i2	bovis	NA	4.10/PGG3	2020-11-19 11:23:40	820558079	1765	Mycobacterium tuberculosis variant bovis	EMBRAPA BEEF CATTLE ()	public	Brazil	WGS	PCR	GENOMIC	PAIRED	ILLUMINA	Illumina HiSeq 2500
SRR13046688	1000110101111110111111111111111111111100000	432773777777600	2323133412234442222--4-2	323423442222-42	232313341223	BOV	Orphan	NA	Drug-resistant: Pyrazinamide (R)	lineageBOV	lineage4.9	4.2.1.1.1.1.1.1.i2	bovis	NA	4.10/PGG3	2020-11-19 11:23:40	53330641	1765	Mycobacterium tuberculosis variant bovis	EMBRAPA BEEF CATTLE ()	public	Brazil	WGS	PCR	GENOMIC	PAIRED	ILLUMINA	Illumina HiSeq 2500
SRR13046689	1100111101111110111111111111111111111100000	636773777777600	232425451222-452313-5242	324522-52313-22	232425451222	BOV_1	997	SB0822	Drug-resistant: Pyrazinamide (R)	lineageBOV	lineage4.9	4.2.1.1.1.1.1.1.i2	bovis	NA	4.10/PGG3	2020-11-19 11:23:40	524542103	1765	Mycobacterium tuberculosis variant bovis	EMBRAPA BEEF CATTLE ()	public	Brazil	WGS	PCR	GENOMIC	PAIRED	ILLUMINA	Illumina HiSeq 2500
SRR5196685	1101001101111110000001111111111101111100000	646770077767600	2225475253241-2141556262	225234121415522	222547525324	BOV	999	SB0821	Drug-resistant: Pyrazinamide (R)	lineageBOV	lineage4.9	4.2.1.1.1.1.1.1.i2	bovis	NA	4.10/PGG3	2018-01-23 00:00:27	355617364	1765	Mycobacterium tuberculosis variant bovis	INRA ()	public	France	WGS	RANDOM	GENOMIC	PAIRED	ILLUMINA	Illumina HiSeq 2500
SRR13268339	1100101000001110111111111111111111111100000	624073777777600	232235565322236131455632	322632261314562	232235565322	BOV	1303	SB0054	Drug-resistant: Pyrazinamide (R)	lineageBOV	lineage4.9	4.2.1.1.1.1.1.1.i2	bovis	NA	4.10/PGG3	2020-12-20 07:35:44	137602327	1765	Mycobacterium tuberculosis variant bovis	UNIVERSITY COLLEGE DUBLIN ()	public	Ireland	WGS	RANDOM	GENOMIC	PAIRED	ILLUMINA	NextSeq 500
SRR13199719	1101101101111110111101111111111111111100000	666773677777600	242314275322133231233632	423732132312362	242314275322	BOV_1	684	SB0265	Drug-resistant: Pyrazinamide (R)	lineageBOV	lineage4.9	4.2.1.1.1.1.1.1.i2	bovis	NA	4.10/PGG3	2021-02-19 10:33:24	407790345	1765	Mycobacterium tuberculosis variant bovis	FCUL ()	public	Portugal	WGS	RANDOM	GENOMIC	PAIRED	ILLUMINA	Illumina MiSeq
SRR13199720	1101111101111110111101111111111111111100000	676773677777600	252324274322647241233332	523732672412332	252324274322	BOV_1	481	SB0121	Drug-resistant: Pyrazinamide (R)	lineageBOV	lineage4.9	4.2.1.1.1.1.1.1.i2	bovis	NA	4.10/PGG3	2021-02-19 10:33:24	449647004	1765	Mycobacterium tuberculosis variant bovis	FCUL ()	public	Portugal	WGS	RANDOM	GENOMIC	PAIRED	ILLUMINA	Illumina MiSeq
SRR13199721	1001111101111100111101111111111111111100000	476763677777600	222546465322257231165562	225632272311652	222546465322	BOV	3585	SB1264	Drug-resistant: Pyrazinamide (R)	lineageBOV	lineage4.9	4.2.1.1.1.1.1.1.i2	bovis	NA	4.10/PGG3	2021-02-19 10:33:24	1854840210	1765	Mycobacterium tuberculosis variant bovis	FCUL ()	public	Portugal	WGS	RANDOM	GENOMIC	PAIRED	ILLUMINA	Illumina HiSeq 1000
SRR13199722	1101111101111110111100111111111111111100000	676773637777600	222324223322353111223532	223232331112252	222324223322	BOV_1	3637	SB1090	Drug-resistant: Pyrazinamide (R)	lineageBOV	lineage4.9	4.2.1.1.1.1.1.1.i2	bovis	NA	4.10/PGG3	2021-02-19 10:33:24	341534171	1765	Mycobacterium tuberculosis variant bovis	FCUL ()	public	Portugal	WGS	RANDOM	GENOMIC	PAIRED	ILLUMINA	Illumina MiSeq
SRR13199723	0101111101111110111101111111111111111100000	276773677777600	222324244322335231233532	223432352312352	222324244322	BOV_1	3532	SB0122	Drug-resistant: Pyrazinamide (R)	lineageBOV	lineage4.9	4.2.1.1.1.1.1.1.i2	bovis	NA	4.10/PGG3	2021-02-19 10:33:24	491188343	1765	Mycobacterium tuberculosis variant bovis	FCUL ()	public	Portugal	WGS	RANDOM	GENOMIC	PAIRED	ILLUMINA	Illumina MiSeq
SRR13199724	1101111101111110111101111111111111111100000	676773677777600	252324236322564231233332	523332542312332	252324236322	BOV_1	481	SB0121	Drug-resistant: Pyrazinamide (R)	lineageBOV	lineage4.9	4.2.1.1.1.1.1.1.i2	bovis	NA	4.10/PGG3	2021-02-19 10:33:24	519310806	1765	Mycobacterium tuberculosis variant bovis	FCUL ()	public	Portugal	WGS	RANDOM	GENOMIC	PAIRED	ILLUMINA	Illumina MiSeq
SRR13199725	1101111101111110111101111111111111111100000	676773677777600	242324234322456241233532	423332462412352	242324234322	BOV_1	481	SB0121	Drug-resistant: Pyrazinamide (R)	lineageBOV	lineage4.9	4.2.1.1.1.1.1.1.i2	bovis	NA	4.10/PGG3	2021-02-19 10:33:24	557836728	1765	Mycobacterium tuberculosis variant bovis	FCUL ()	public	Portugal	WGS	RANDOM	GENOMIC	PAIRED	ILLUMINA	Illumina MiSeq
SRR13199726	1100111101110110111111111111111111001100000	636733777774600	242324232322266341013632	423332263410162	242324232322	BOV_1	3520	SB1174	Drug-resistant: Pyrazinamide (R)	lineageBOV	lineage4.9	4.2.1.1.1.1.1.1.i2	NA	NA	4.10/PGG3	2021-02-19 10:33:24	284298991	1765	Mycobacterium tuberculosis variant bovis	FCUL ()	public	Portugal	WGS	RANDOM	GENOMIC	PAIRED	ILLUMINA	Illumina MiSeq
SRR13199727	0101111101111110111101111111111111111100000	276773677777600	222324235322433431233332	223332434312332	222324235322	BOV_1	3532	SB0122	Drug-resistant: Pyrazinamide (R)	lineageBOV	lineage4.9	4.2.1.1.1.1.1.1.i2	bovis	NA	4.10/PGG3	2021-02-19 10:33:24	334752709	1765	Mycobacterium tuberculosis variant bovis	FCUL ()	public	Portugal	WGS	RANDOM	GENOMIC	PAIRED	ILLUMINA	Illumina MiSeq
SRR13199728	1101111101111100111101111111111111111100000	676763677777600	222324244322465241233532	223432452412352	222324244322	BOV	695	SB0119	Drug-resistant: Pyrazinamide (R)	lineageBOV	lineage4.9	4.2.1.1.1.1.1.1.i2	bovis	NA	4.10/PGG3	2021-02-19 10:33:24	487471411	1765	Mycobacterium tuberculosis variant bovis	FCUL ()	public	Portugal	WGS	RANDOM	GENOMIC	PAIRED	ILLUMINA	Illumina MiSeq
SRR13199729	1101101101111110111101111111111111111100000	666773677777600	232314255322153221233332	323532132212332	232314255322	BOV_1	684	SB0265	Drug-resistant: Pyrazinamide (R)	lineageBOV	lineage4.9	4.2.1.1.1.1.1.1.i2	bovis	NA	4.10/PGG3	2021-02-19 10:33:24	398635664	1765	Mycobacterium tuberculosis variant bovis	FCUL ()	public	Portugal	WGS	RANDOM	GENOMIC	PAIRED	ILLUMINA	Illumina MiSeq
SRR13199730	1101101101111110111101111111111111111100000	666773677777600	222324263422743231233332	223642732312332	222324263422	BOV_1	684	SB0265	Drug-resistant: Pyrazinamide (R)	lineageBOV	lineage4.9	4.2.1.1.1.1.1.1.i2	bovis	NA	4.10/PGG3	2021-02-19 10:33:24	397291847	1765	Mycobacterium tuberculosis variant bovis	FCUL ()	public	Portugal	WGS	RANDOM	GENOMIC	PAIRED	ILLUMINA	Illumina MiSeq
SRR13199731	0101111101111110111101111111111111111100000	276773677777600	232324255322336231233432	323532362312342	232324255322	BOV_1	3532	SB0122	Drug-resistant: Pyrazinamide (R)	lineageBOV	lineage4.9	4.2.1.1.1.1.1.1.i2	bovis	NA	4.10/PGG3	2021-02-19 10:33:24	306039188	1765	Mycobacterium tuberculosis variant bovis	FCUL ()	public	Portugal	WGS	RANDOM	GENOMIC	PAIRED	ILLUMINA	Illumina MiSeq
SRR13199732	1101111101111110111101111111111111111100000	676773677777600	222324233322566231233532	223332562312352	222324233322	BOV_1	481	SB0121	Drug-resistant: Pyrazinamide (R)	lineageBOV	lineage4.9	4.2.1.1.1.1.1.1.i2	bovis	NA	4.10/PGG3	2021-02-19 10:33:24	668292649	1765	Mycobacterium tuberculosis variant bovis	FCUL ()	public	Portugal	WGS	RANDOM	GENOMIC	PAIRED	ILLUMINA	Illumina MiSeq
SRR13199733	1100111101110110111111111111111111001100000	636733777774600	262224232322-59321013332	622332-93210132	262224232322	BOV_1	3520	SB1174	Drug-resistant: Pyrazinamide (R)	lineageBOV	lineage4.9	4.2.1.1.1.1.1.1.i2	NA	NA	4.10/PGG3	2021-02-19 10:33:24	154031287	1765	Mycobacterium tuberculosis variant bovis	FCUL ()	public	Portugal	WGS	RANDOM	GENOMIC	PAIRED	ILLUMINA	Illumina MiSeq
SRR13199734	1100111101110110111111111111111111001100000	636733777774600	222324232322255331013432	223332253310142	222324232322	BOV_1	3520	SB1174	Drug-resistant: Pyrazinamide (R)	lineageBOV	lineage4.9	4.2.1.1.1.1.1.1.i2	NA	NA	4.10/PGG3	2021-02-19 10:33:24	437935900	1765	Mycobacterium tuberculosis variant bovis	FCUL ()	public	Portugal	WGS	RANDOM	GENOMIC	PAIRED	ILLUMINA	Illumina MiSeq
SRR13199735	1100111101110110111111111111111111001100000	636733777774600	232324242322277341013532	323432273410152	232324242322	BOV_1	3520	SB1174	Drug-resistant: Pyrazinamide (R)	lineageBOV	lineage4.9	4.2.1.1.1.1.1.1.i2	NA	NA	4.10/PGG3	2021-02-19 10:33:24	450155918	1765	Mycobacterium tuberculosis variant bovis	FCUL ()	public	Portugal	WGS	RANDOM	GENOMIC	PAIRED	ILLUMINA	Illumina MiSeq
SRR13199736	1001111101111110111101111111111111110100000	476773677777200	222324236322466241233332	223332462412332	222324236322	BOV	3510	SB1190	Drug-resistant: Pyrazinamide (R)	lineageBOV	lineage4.9	4.2.1.1.1.1.1.1.i2	bovis	NA	4.10/PGG3	2021-02-19 10:33:23	425486471	1765	Mycobacterium tuberculosis variant bovis	FCUL ()	public	Portugal	WGS	RANDOM	GENOMIC	PAIRED	ILLUMINA	Illumina MiSeq
SRR13199737	1001111101111110111101111111111111110100000	476773677777200	222324232322436241233632	223332462412362	222324232322	BOV	3510	SB1190	Drug-resistant: Pyrazinamide (R)	lineageBOV	lineage4.9	4.2.1.1.1.1.1.1.i2	bovis	NA	4.10/PGG3	2021-02-19 10:33:23	472656942	1765	Mycobacterium tuberculosis variant bovis	FCUL ()	public	Portugal	WGS	RANDOM	GENOMIC	PAIRED	ILLUMINA	Illumina MiSeq
SRR13199738	1001111101111100111101111111111111111100000	476763677777600	222324242322253221233432	223432232212342	222324242322	BOV	3585	SB1264	Drug-resistant: Pyrazinamide (R)	lineageBOV	lineage4.9	4.2.1.1.1.1.1.1.i2	bovis	NA	4.10/PGG3	2021-02-19 10:33:23	253451486	1765	Mycobacterium tuberculosis variant bovis	FCUL ()	public	Portugal	WGS	RANDOM	GENOMIC	PAIRED	ILLUMINA	Illumina MiSeq
SRR13199739	1101111101111110111101111111111111111100000	676773677777600	252324234322557241233532	523332572412352	252324234322	BOV_1	481	SB0121	Drug-resistant: Pyrazinamide (R)	lineageBOV	lineage4.9	4.2.1.1.1.1.1.1.i2	bovis	NA	4.10/PGG3	2021-02-19 10:33:23	415201926	1765	Mycobacterium tuberculosis variant bovis	FCUL ()	public	Portugal	WGS	RANDOM	GENOMIC	PAIRED	ILLUMINA	Illumina MiSeq
SRR13199740	1001111101111110111101111111111111110100000	476773677777200	242324233322744231233332	423332742312332	242324233322	BOV	3510	SB1190	Drug-resistant: Pyrazinamide (R)	lineageBOV	lineage4.9	4.2.1.1.1.1.1.1.i2	bovis	NA	4.10/PGG3	2021-02-19 10:33:23	303431851	1765	Mycobacterium tuberculosis variant bovis	FCUL ()	public	Portugal	WGS	RANDOM	GENOMIC	PAIRED	ILLUMINA	Illumina MiSeq
SRR13199741	1001111101111100111101111111111111111100000	476763677777600	222324265322465231233632	223632452312362	222324265322	BOV	3585	SB1264	Drug-resistant: Pyrazinamide (R)	lineageBOV	lineage4.9	4.2.1.1.1.1.1.1.i2	bovis	NA	4.10/PGG3	2021-02-19 10:33:23	412639447	1765	Mycobacterium tuberculosis variant bovis	FCUL ()	public	Portugal	WGS	RANDOM	GENOMIC	PAIRED	ILLUMINA	Illumina MiSeq
SRR13199742	1100111101110110111111111111111111001100000	636733777774600	222324232322467321013332	223332473210132	222324232322	BOV_1	3520	SB1174	Drug-resistant: Pyrazinamide (R)	lineageBOV	lineage4.9	4.2.1.1.1.1.1.1.i2	NA	NA	4.10/PGG3	2021-02-19 10:33:23	359116823	1765	Mycobacterium tuberculosis variant bovis	FCUL ()	public	Portugal	WGS	RANDOM	GENOMIC	PAIRED	ILLUMINA	Illumina MiSeq
SRR13199743	1101101101111110111101111111111111111100000	666773677777600	232324245322463231233332	323432432312332	232324245322	BOV_1	684	SB0265	Drug-resistant: Pyrazinamide (R)	lineageBOV	lineage4.9	4.2.1.1.1.1.1.1.i2	bovis	NA	4.10/PGG3	2021-02-19 10:33:24	338451833	1765	Mycobacterium tuberculosis variant bovis	FCUL ()	public	Portugal	WGS	RANDOM	GENOMIC	PAIRED	ILLUMINA	Illumina MiSeq
SRR13199744	1001111101111100111101111111111111111100000	476763677777600	222324263322245231233532	223632252312352	222324263322	BOV	3585	SB1264	Drug-resistant: Pyrazinamide (R)	lineageBOV	lineage4.9	4.2.1.1.1.1.1.1.i2	bovis	NA	4.10/PGG3	2021-02-19 10:33:24	313691158	1765	Mycobacterium tuberculosis variant bovis	FCUL ()	public	Portugal	WGS	RANDOM	GENOMIC	PAIRED	ILLUMINA	Illumina MiSeq
SRR13199745	1101111101111110111101111111111111111100000	676773677777600	222324242322435231223332	223432452312232	222324242322	BOV_1	481	SB0121	Drug-resistant: Pyrazinamide (R)	lineageBOV	lineage4.9	4.2.1.1.1.1.1.1.i2	bovis	NA	4.10/PGG3	2021-02-19 10:33:24	417299366	1765	Mycobacterium tuberculosis variant bovis	FCUL ()	public	Portugal	WGS	RANDOM	GENOMIC	PAIRED	ILLUMINA	Illumina MiSeq
SRR13199746	1001111101111100111101111111111111111100000	476763677777600	222324234322354231233532	223332342312352	222324234322	BOV	3585	SB1264	Drug-resistant: Pyrazinamide (R) Streptomycin (R)	lineageBOV	lineage4.9	4.2.1.1.1.1.1.1.i2	bovis	NA	4.10/PGG3	2021-02-19 10:33:24	330603712	1765	Mycobacterium tuberculosis variant bovis	FCUL ()	public	Portugal	WGS	RANDOM	GENOMIC	PAIRED	ILLUMINA	Illumina MiSeq
SRR13199747	1001111101111110111101111111111111110100000	476773677777200	222324263322255231233532	223632252312352	222324263322	BOV	3510	SB1190	Drug-resistant: Pyrazinamide (R)	lineageBOV	lineage4.9	4.2.1.1.1.1.1.1.i2	bovis	NA	4.10/PGG3	2021-02-19 10:33:24	253343383	1765	Mycobacterium tuberculosis variant bovis	FCUL ()	public	Portugal	WGS	RANDOM	GENOMIC	PAIRED	ILLUMINA	Illumina MiSeq
SRR13199748	1101011101111110111101111111111111111100000	656773677777600	232324242322333241223532	323432332412252	232324242322	BOV_1	Orphan	SB1195	Drug-resistant: Pyrazinamide (R)	lineageBOV	lineage4.9	4.2.1.1.1.1.1.1.i2	bovis	NA	4.10/PGG3	2021-02-19 10:33:24	325198075	1765	Mycobacterium tuberculosis variant bovis	FCUL ()	public	Portugal	WGS	RANDOM	GENOMIC	PAIRED	ILLUMINA	Illumina MiSeq
SRR13199749	1001111101111100111101111111111111111100000	476763677777600	222324236322534241233632	223332542412362	222324236322	BOV	3585	SB1264	Drug-resistant: Pyrazinamide (R)	lineageBOV	lineage4.9	4.2.1.1.1.1.1.1.i2	bovis	NA	4.10/PGG3	2021-02-19 10:33:24	422177742	1765	Mycobacterium tuberculosis variant bovis	FCUL ()	public	Portugal	WGS	RANDOM	GENOMIC	PAIRED	ILLUMINA	Illumina MiSeq
SRR13199750	1101111101111110111101111111111111110100000	676773677777200	222324244322535241233332	223432552412332	222324244322	BOV_1	698	SB0295	Drug-resistant: Pyrazinamide (R)	lineageBOV	lineage4.9	4.2.1.1.1.1.1.1.i2	bovis	NA	4.10/PGG3	2021-02-19 10:33:24	452732663	1765	Mycobacterium tuberculosis variant bovis	FCUL ()	public	Portugal	WGS	RANDOM	GENOMIC	PAIRED	ILLUMINA	Illumina MiSeq
SRR13199751	1101111101111110111101111111111111111100000	676773677777600	232324234322347241233532	323332372412352	232324234322	BOV_1	481	SB0121	Drug-resistant: Pyrazinamide (R)	lineageBOV	lineage4.9	4.2.1.1.1.1.1.1.i2	bovis	NA	4.10/PGG3	2021-02-19 10:33:24	399854838	1765	Mycobacterium tuberculosis variant bovis	FCUL ()	public	Portugal	WGS	RANDOM	GENOMIC	PAIRED	ILLUMINA	Illumina MiSeq
SRR13199752	1100111101110110111111111111111111001100000	636733777774600	242324242322266331013532	423432263310152	242324242322	BOV_1	3520	SB1174	Drug-resistant: Pyrazinamide (R)	lineageBOV	lineage4.9	4.2.1.1.1.1.1.1.i2	NA	NA	4.10/PGG3	2021-02-19 10:33:24	419923367	1765	Mycobacterium tuberculosis variant bovis	FCUL ()	public	Portugal	WGS	RANDOM	GENOMIC	PAIRED	ILLUMINA	Illumina MiSeq
SRR13199753	1101101101111110111101111111111111111100000	666773677777600	222324252322233231233532	223532232312352	222324252322	BOV_1	684	SB0265	Drug-resistant: Pyrazinamide (R)	lineageBOV	lineage4.9	4.2.1.1.1.1.1.1.i2	bovis	NA	4.10/PGG3	2021-02-19 10:33:24	230916714	1765	Mycobacterium tuberculosis variant bovis	FCUL ()	public	Portugal	WGS	RANDOM	GENOMIC	PAIRED	ILLUMINA	Illumina MiSeq
SRR13199754	1101011101111110111101111111111111111100000	656773677777600	232324253322333231223532	323532332312252	232324253322	BOV_1	Orphan	SB1195	Drug-resistant: Pyrazinamide (R)	lineageBOV	lineage4.9	4.2.1.1.1.1.1.1.i2	bovis	NA	4.10/PGG3	2021-02-19 10:33:24	270042350	1765	Mycobacterium tuberculosis variant bovis	FCUL ()	public	Portugal	WGS	RANDOM	GENOMIC	PAIRED	ILLUMINA	Illumina MiSeq
SRR13199755	1001111101111100111101111111111111111100000	476763677777600	222324234322663231233532	223332632312352	222324234322	BOV	3585	SB1264	Drug-resistant: Pyrazinamide (R)	lineageBOV	lineage4.9	4.2.1.1.1.1.1.1.i2	bovis	NA	4.10/PGG3	2021-02-19 10:33:24	416451122	1765	Mycobacterium tuberculosis variant bovis	FCUL ()	public	Portugal	WGS	RANDOM	GENOMIC	PAIRED	ILLUMINA	Illumina MiSeq
SRR13199756	1100111101110110111111111111111111001100000	636733777774600	222324242322357341013532	223432373410152	222324242322	BOV_1	3520	SB1174	Drug-resistant: Pyrazinamide (R)	lineageBOV	lineage4.9	4.2.1.1.1.1.1.1.i2	NA	NA	4.10/PGG3	2021-02-19 10:33:24	493298863	1765	Mycobacterium tuberculosis variant bovis	FCUL ()	public	Portugal	WGS	RANDOM	GENOMIC	PAIRED	ILLUMINA	Illumina MiSeq
SRR13199757	1101111101111110111101111111111111111100000	676773677777600	222324272322237241223432	223732272412242	222324272322	BOV_1	481	SB0121	Drug-resistant: Pyrazinamide (R)	lineageBOV	lineage4.9	4.2.1.1.1.1.1.1.i2	bovis	NA	4.10/PGG3	2021-02-19 10:33:24	300611921	1765	Mycobacterium tuberculosis variant bovis	FCUL ()	public	Portugal	WGS	RANDOM	GENOMIC	PAIRED	ILLUMINA	Illumina MiSeq
SRR13199758	1100111101110110111111111111111111001100000	636733777774600	222324232322567431013632	223332574310162	222324232322	BOV_1	3520	SB1174	Drug-resistant: Pyrazinamide (R)	lineageBOV	lineage4.9	4.2.1.1.1.1.1.1.i2	NA	NA	4.10/PGG3	2021-02-19 10:33:24	499257113	1765	Mycobacterium tuberculosis variant bovis	FCUL ()	public	Portugal	WGS	RANDOM	GENOMIC	PAIRED	ILLUMINA	Illumina MiSeq
SRR13199759	1100111101110110111111111111111111001100000	636733777774600	222324272322444531013732	223732445310172	222324272322	BOV_1	3520	SB1174	Drug-resistant: Pyrazinamide (R)	lineageBOV	lineage4.9	4.2.1.1.1.1.1.1.i2	NA	NA	4.10/PGG3	2021-02-19 10:33:24	466176051	1765	Mycobacterium tuberculosis variant bovis	FCUL ()	public	Portugal	WGS	RANDOM	GENOMIC	PAIRED	ILLUMINA	Illumina MiSeq
SRR13199760	0101111101111110111101111111111111111100000	276773677777600	242324255322336231233532	423532362312352	242324255322	BOV_1	3532	SB0122	Drug-resistant: Pyrazinamide (R)	lineageBOV	lineage4.9	4.2.1.1.1.1.1.1.i2	bovis	NA	4.10/PGG3	2021-02-19 10:33:24	392053299	1765	Mycobacterium tuberculosis variant bovis	FCUL ()	public	Portugal	WGS	RANDOM	GENOMIC	PAIRED	ILLUMINA	Illumina MiSeq
SRR13199761	1101101101111110111101111111111111111100000	666773677777600	222647561522266231556662	226652262315562	222647561522	BOV_1	684	SB0265	Drug-resistant: Pyrazinamide (R)	lineageBOV	lineage4.9	4.2.1.1.1.1.1.1.i2	bovis	NA	4.10/PGG3	2021-02-19 10:33:24	2055730610	1765	Mycobacterium tuberculosis variant bovis	FCUL ()	public	Portugal	WGS	RANDOM	GENOMIC	PAIRED	ILLUMINA	Illumina HiSeq 1000
SRR13199762	1100111101110110111111111111111111001100000	636733777774600	222324232322546331013332	223332563310132	222324232322	BOV_1	3520	SB1174	Drug-resistant: Pyrazinamide (R)	lineageBOV	lineage4.9	4.2.1.1.1.1.1.1.i2	NA	NA	4.10/PGG3	2021-02-19 10:33:24	565854636	1765	Mycobacterium tuberculosis variant bovis	FCUL ()	public	Portugal	WGS	RANDOM	GENOMIC	PAIRED	ILLUMINA	Illumina MiSeq
SRR13500167	1101101000001110111111111111111111111100000	664073777777600	222224154322555231233532	222532552312352	222224154322	BOV_2	683	SB0140	Drug-resistant: Pyrazinamide (R)	lineageBOV	lineage4.9	4.2.1.1.1.1.1.1.i2	bovis	NA	4.10/PGG3	2021-01-21 19:14:18	381209350	1869227	bacterium	USDA-NVSL-DBPL ()	public	USA	WGS	RANDOM	GENOMIC	PAIRED	ILLUMINA	Illumina MiSeq
SRR13500168	1101101000001110111111111111111111111100000	664073777777600	222224232322-57-31233632	222332-7-312362	222224232322	BOV_2	683	SB0140	Drug-resistant: Pyrazinamide (R)	lineageBOV	lineage4.9	4.2.1.1.1.1.1.1.i2	bovis	NA	4.10/PGG3	2021-01-21 19:14:18	342192494	1869227	bacterium	USDA-NVSL-DBPL ()	public	USA	WGS	RANDOM	GENOMIC	PAIRED	ILLUMINA	Illumina MiSeq
SRR13500169	1101101000001110111111111111111111111100000	664073777777600	222124242322236331233332	221432263312332	222124242322	BOV_2	683	SB0140	Drug-resistant: Pyrazinamide (R)	lineageBOV	lineage4.9	4.2.1.1.1.1.1.1.i2	bovis	NA	4.10/PGG3	2021-01-21 19:14:18	372625028	1869227	bacterium	USDA-NVSL-DBPL ()	public	USA	WGS	RANDOM	GENOMIC	PAIRED	ILLUMINA	Illumina MiSeq
SRR13500170	1101100000001110111111111111111111111100000	660073777777600	222224234322565421233332	222332554212332	222224234322	BOV	Orphan	SB1924	Drug-resistant: Pyrazinamide (R)	lineageBOV	lineage4.9	4.2.1.1.1.1.1.1.i2	bovis	NA	4.10/PGG3	2021-01-21 19:14:18	513821368	1869227	bacterium	USDA-NVSL-DBPL ()	public	USA	WGS	RANDOM	GENOMIC	PAIRED	ILLUMINA	Illumina MiSeq
SRR13500171	1101101000001110111111111111011111111100000	664073777577600	242224145322546431233532	422432564312352	242224145322	BOV_2	1863	SB0978	Drug-resistant: Pyrazinamide (R)	lineageBOV	lineage4.9	4.2.1.1.1.1.1.1.i2	bovis	NA	4.10/PGG3	2021-01-21 19:14:18	444287179	1869227	bacterium	USDA-NVSL-DBPL ()	public	USA	WGS	RANDOM	GENOMIC	PAIRED	ILLUMINA	Illumina MiSeq
SRR13500172	1101101000001110111111111111111111111100000	664073777777600	232224262322-55-31233532	322632-5-312352	232224262322	BOV_2	683	SB0140	Drug-resistant: Pyrazinamide (R)	lineageBOV	lineage4.9	4.2.1.1.1.1.1.1.i2	bovis	NA	4.10/PGG3	2021-01-21 19:14:18	267720603	1869227	bacterium	USDA-NVSL-DBPL ()	public	USA	WGS	RANDOM	GENOMIC	PAIRED	ILLUMINA	Illumina MiSeq
SRR13500173	1101101000001110111111111111111111111100000	664073777777600	242224262322-54-31233332	422632-4-312332	242224262322	BOV_2	683	SB0140	Drug-resistant: Pyrazinamide (R)	lineageBOV	lineage4.9	4.2.1.1.1.1.1.1.i2	bovis	NA	4.10/PGG3	2021-01-21 19:14:18	691221595	1869227	bacterium	USDA-NVSL-DBPL ()	public	USA	WGS	RANDOM	GENOMIC	PAIRED	ILLUMINA	Illumina MiSeq
SRR13500174	1101101000001110111111111111111111111100000	664073777777600	242224154322356231233332	422532362312332	242224154322	BOV_2	683	SB0140	Drug-resistant: Pyrazinamide (R)	lineageBOV	lineage4.9	4.2.1.1.1.1.1.1.i2	bovis	NA	4.10/PGG3	2021-01-21 19:14:18	354442084	1869227	bacterium	USDA-NVSL-DBPL ()	public	USA	WGS	RANDOM	GENOMIC	PAIRED	ILLUMINA	Illumina MiSeq
SRR13500175	1101110101111110111111111111111111111100000	672773777777600	262314242322-64231533332	623432-42315332	262314242322	BOV_1	3529	SB0920	Drug-resistant: Pyrazinamide (R)	lineageBOV	lineage4.9	4.2.1.1.1.1.1.1.i2	bovis	NA	4.10/PGG3	2021-01-21 19:14:18	120304900	1869227	bacterium	USDA-NVSL-DBPL ()	public	USA	WGS	RANDOM	GENOMIC	PAIRED	ILLUMINA	Illumina MiSeq
SRR13500176	1101101000001110111111111111111111111100000	664073777777600	232224244322-55-31233532	322432-5-312352	232224244322	BOV_2	683	SB0140	Drug-resistant: Pyrazinamide (R)	lineageBOV	lineage4.9	4.2.1.1.1.1.1.1.i2	bovis	NA	4.10/PGG3	2021-01-21 19:14:18	269409142	1869227	bacterium	USDA-NVSL-DBPL ()	public	USA	WGS	RANDOM	GENOMIC	PAIRED	ILLUMINA	Illumina MiSeq
SRR13500177	1101101000001110111111111111111111111100000	664073777777600	232224244322-43-31233232	322432-3-312322	232224244322	BOV_2	683	SB0140	Drug-resistant: Pyrazinamide (R)	lineageBOV	lineage4.9	4.2.1.1.1.1.1.1.i2	bovis	NA	4.10/PGG3	2021-01-21 19:14:18	237656075	1869227	bacterium	USDA-NVSL-DBPL ()	public	USA	WGS	RANDOM	GENOMIC	PAIRED	ILLUMINA	Illumina MiSeq
SRR13500178	1101101000001100011111111111111111111100000	664061777777600	222224244322-45-31232332	222432-5-312332	222224244322	BOV	Orphan	SB1046	Drug-resistant: Pyrazinamide (R)	lineageBOV	lineage4.9	4.2.1.1.1.1.1.1.i2	bovis	NA	4.10/PGG3	2021-01-21 19:14:18	419715265	1869227	bacterium	USDA-NVSL-DBPL ()	public	USA	WGS	RANDOM	GENOMIC	PAIRED	ILLUMINA	Illumina MiSeq
SRR13500179	1101101000001110111111111111111111111100000	664073777777600	232224243322355221233532	322432352212352	232224243322	BOV_2	683	SB0140	Drug-resistant: Pyrazinamide (R)	lineageBOV	lineage4.9	4.2.1.1.1.1.1.1.i2	bovis	NA	4.10/PGG3	2021-01-21 19:14:18	230659550	1869227	bacterium	USDA-NVSL-DBPL ()	public	USA	WGS	RANDOM	GENOMIC	PAIRED	ILLUMINA	Illumina MiSeq
SRR13500180	1101101000000000001111111111111110111100000	664000777773600	222224242322-55-31231432	222432-5-312342	222224242322	BOV	Orphan	NA	Drug-resistant: Pyrazinamide (R)	lineageBOV	lineage4.9	4.2.1.1.1.1.1.1.i2	bovis	NA	4.10/PGG3	2021-01-21 19:14:18	436957305	1869227	bacterium	USDA-NVSL-DBPL ()	public	USA	WGS	RANDOM	GENOMIC	PAIRED	ILLUMINA	Illumina MiSeq
SRR13500181	1101101000001110111111111111111111111100000	664073777777600	222224254322-53-31233232	222532-3-312322	222224254322	BOV_2	683	SB0140	Drug-resistant: Pyrazinamide (R)	lineageBOV	lineage4.9	4.2.1.1.1.1.1.1.i2	bovis	NA	4.10/PGG3	2021-01-21 19:14:18	408085204	1869227	bacterium	USDA-NVSL-DBPL ()	public	USA	WGS	RANDOM	GENOMIC	PAIRED	ILLUMINA	Illumina MiSeq
SRR13500182	1101101000001110111111111111111111111100000	664073777777600	232224244322-53-31233332	322432-3-312332	232224244322	BOV_2	683	SB0140	Drug-resistant: Pyrazinamide (R)	lineageBOV	lineage4.9	4.2.1.1.1.1.1.1.i2	bovis	NA	4.10/PGG3	2021-01-21 19:14:17	381340413	1869227	bacterium	USDA-NVSL-DBPL ()	public	USA	WGS	RANDOM	GENOMIC	PAIRED	ILLUMINA	Illumina MiSeq
SRR13500183	1101101000001110111111111111111111111100000	664073777777600	232224232322-36-31233332	322332-6-312332	232224232322	BOV_2	683	SB0140	Drug-resistant: Pyrazinamide (R)	lineageBOV	lineage4.9	4.2.1.1.1.1.1.1.i2	bovis	NA	4.10/PGG3	2021-01-21 19:14:17	279323644	1869227	bacterium	USDA-NVSL-DBPL ()	public	USA	WGS	RANDOM	GENOMIC	PAIRED	ILLUMINA	Illumina MiSeq
SRR13500184	1101101000001110111111111111111111111100000	664073777777600	232224254322-36-31233332	322532-6-312332	232224254322	BOV_2	683	SB0140	Drug-resistant: Pyrazinamide (R)	lineageBOV	lineage4.9	4.2.1.1.1.1.1.1.i2	bovis	NA	4.10/PGG3	2021-01-21 19:14:17	445182971	1869227	bacterium	USDA-NVSL-DBPL ()	public	USA	WGS	RANDOM	GENOMIC	PAIRED	ILLUMINA	Illumina MiSeq
SRR13500185	1101101000001110111111111111111111111100000	664073777777600	242224142322535331233532	422432553312352	242224142322	BOV_2	683	SB0140	Drug-resistant: Pyrazinamide (R)	lineageBOV	lineage4.9	4.2.1.1.1.1.1.1.i2	bovis	NA	4.10/PGG3	2021-01-21 19:14:17	497740030	1869227	bacterium	USDA-NVSL-DBPL ()	public	USA	WGS	RANDOM	GENOMIC	PAIRED	ILLUMINA	Illumina MiSeq
SRR13500186	1101101000001110111111111111111111111100000	664073777777600	242224242322-46-31233532	422432-6-312352	242224242322	BOV_2	683	SB0140	Drug-resistant: Pyrazinamide (R)	lineageBOV	lineage4.9	4.2.1.1.1.1.1.1.i2	bovis	NA	4.10/PGG3	2021-01-21 19:14:17	471939077	1869227	bacterium	USDA-NVSL-DBPL ()	public	USA	WGS	RANDOM	GENOMIC	PAIRED	ILLUMINA	Illumina MiSeq
SRR13500187	1101101000001110111111111111111111111100000	664073777777600	242224243322-56-31233332	422432-6-312332	242224243322	BOV_2	683	SB0140	Drug-resistant: Pyrazinamide (R)	lineageBOV	lineage4.9	4.2.1.1.1.1.1.1.i2	bovis	NA	4.10/PGG3	2021-01-21 19:14:17	493815833	1869227	bacterium	USDA-NVSL-DBPL ()	public	USA	WGS	RANDOM	GENOMIC	PAIRED	ILLUMINA	Illumina MiSeq
SRR13500188	1101101000001110111111111111111111111100000	664073777777600	222224262322-45-31233332	222632-5-312332	222224262322	BOV_2	683	SB0140	Drug-resistant: Pyrazinamide (R)	lineageBOV	lineage4.9	4.2.1.1.1.1.1.1.i2	bovis	NA	4.10/PGG3	2021-01-21 19:14:17	575778886	1869227	bacterium	USDA-NVSL-DBPL ()	public	USA	WGS	RANDOM	GENOMIC	PAIRED	ILLUMINA	Illumina MiSeq
SRR13500189	1101101000001110111111111111011111111100000	664073777577600	232224132322535431233432	322332554312342	232224132322	BOV_2	1863	SB0978	Drug-resistant: Pyrazinamide (R)	lineageBOV	lineage4.9	4.2.1.1.1.1.1.1.i2	bovis	NA	4.10/PGG3	2021-01-21 19:14:17	320077481	1869227	bacterium	USDA-NVSL-DBPL ()	public	USA	WGS	RANDOM	GENOMIC	PAIRED	ILLUMINA	Illumina MiSeq
SRR13500190	1101101000001110111111111111111111111100000	664073777777600	222224245321-56-31233532	222431-6-312352	222224245321	BOV_2	683	SB0140	Drug-resistant: Pyrazinamide (R)	lineageBOV	lineage4.9	4.2.1.1.1.1.1.1.i2	bovis	NA	4.10/PGG3	2021-01-21 19:14:17	435438626	1869227	bacterium	USDA-NVSL-DBPL ()	public	USA	WGS	RANDOM	GENOMIC	PAIRED	ILLUMINA	Illumina MiSeq
SRR13500191	1101101000001110111111111111111111111100000	664073777777600	242224244322-53-31233432	422432-3-312342	242224244322	BOV_2	683	SB0140	Drug-resistant: Pyrazinamide (R)	lineageBOV	lineage4.9	4.2.1.1.1.1.1.1.i2	bovis	NA	4.10/PGG3	2021-01-21 19:14:17	495383723	1869227	bacterium	USDA-NVSL-DBPL ()	public	USA	WGS	RANDOM	GENOMIC	PAIRED	ILLUMINA	Illumina MiSeq
SRR13500192	1101101000001110111111111111111111111100000	664073777777600	232224252322-44-31233632	322532-4-312362	232224252322	BOV_2	683	SB0140	Drug-resistant: Pyrazinamide (R)	lineageBOV	lineage4.9	4.2.1.1.1.1.1.1.i2	bovis	NA	4.10/PGG3	2021-01-21 19:14:17	318626724	1869227	bacterium	USDA-NVSL-DBPL ()	public	USA	WGS	RANDOM	GENOMIC	PAIRED	ILLUMINA	Illumina MiSeq
SRR13500193	1101101000001110111111111111111111111100000	664073777777600	222224235322-45-31233432	222332-5-312342	222224235322	BOV_2	683	SB0140	Drug-resistant: Pyrazinamide (R)	lineageBOV	lineage4.9	4.2.1.1.1.1.1.1.i2	bovis	NA	4.10/PGG3	2021-01-21 19:14:17	513567108	1869227	bacterium	USDA-NVSL-DBPL ()	public	USA	WGS	RANDOM	GENOMIC	PAIRED	ILLUMINA	Illumina MiSeq
SRR13500194	1101101000001110111111111111111111011100000	664073777775600	122224264322-56-21233532	222632-6-212352	122224264322	BOV_2	Orphan	SB1186	Drug-resistant: Pyrazinamide (R)	lineageBOV	lineage4.9	4.2.1.1.1.1.1.1.i2	bovis	NA	4.10/PGG3	2021-01-21 19:14:17	407691832	1869227	bacterium	USDA-NVSL-DBPL ()	public	USA	WGS	RANDOM	GENOMIC	PAIRED	ILLUMINA	Illumina MiSeq
SRR13500195	1101101000001110111111111111111111111100000	664073777777600	222224242322-37-31233332	222432-7-312332	222224242322	BOV_2	683	SB0140	Drug-resistant: Pyrazinamide (R)	lineageBOV	lineage4.9	4.2.1.1.1.1.1.1.i2	bovis	NA	4.10/PGG3	2021-01-21 19:14:17	529645342	1869227	bacterium	USDA-NVSL-DBPL ()	public	USA	WGS	RANDOM	GENOMIC	PAIRED	ILLUMINA	Illumina MiSeq
SRR13500196	1101101000001110111111111111111111001100000	664073777774600	222224233322-76-31233332	222332-6-312332	222224233322	BOV_2	Orphan	SB1047	Drug-resistant: Pyrazinamide (R)	lineageBOV	lineage4.9	4.2.1.1.1.1.1.1.i2	bovis	NA	4.10/PGG3	2021-01-21 19:14:17	352531777	1869227	bacterium	USDA-NVSL-DBPL ()	public	USA	WGS	RANDOM	GENOMIC	PAIRED	ILLUMINA	Illumina MiSeq
SRR13500197	1101000000000010111111111101111111111100000	640013776777600	222224244322556321233422	222432563212342	222224244322	BOV_3	1846	SB0292	Drug-resistant: Pyrazinamide (R)	lineageBOV	lineage4.9	4.2.1.1.1.1.1.1.i2	bovis	NA	4.10/PGG3	2021-01-21 19:14:17	330264098	1869227	bacterium	USDA-NVSL-DBPL ()	public	USA	WGS	RANDOM	GENOMIC	PAIRED	ILLUMINA	Illumina MiSeq
SRR13500198	1101000000000010111111111101111111111100000	640013776777600	232224246322566421233422	322432564212342	232224246322	BOV_3	1846	SB0292	Drug-resistant: Pyrazinamide (R)	lineageBOV	lineage4.9	4.2.1.1.1.1.1.1.i2	bovis	NA	4.10/PGG3	2021-01-21 19:14:17	417477189	1869227	bacterium	USDA-NVSL-DBPL ()	public	USA	WGS	RANDOM	GENOMIC	PAIRED	ILLUMINA	Illumina MiSeq
SRR13500199	1101000000000010111111111101111111111100000	640013776777600	222224262322537331233422	222632573312342	222224262322	BOV_3	1846	SB0292	Drug-resistant: Pyrazinamide (R)	lineageBOV	lineage4.9	4.2.1.1.1.1.1.1.i2	bovis	NA	4.10/PGG3	2021-01-21 19:14:17	364313253	1869227	bacterium	USDA-NVSL-DBPL ()	public	USA	WGS	RANDOM	GENOMIC	PAIRED	ILLUMINA	Illumina MiSeq
SRR13500200	1101101000001110111111111111111110111100000	664073777773600	222224222622556331433432	222262563314342	222224222622	BOV_2	1855	SB1033	Drug-resistant: Pyrazinamide (R)	lineageBOV	lineage4.9	4.2.1.1.1.1.1.1.i2	bovis	NA	4.10/PGG3	2021-01-21 19:14:17	704304750	1869227	bacterium	USDA-NVSL-DBPL ()	public	USA	WGS	RANDOM	GENOMIC	PAIRED	ILLUMINA	Illumina MiSeq
SRR13500201	1101101000001110111111111111111111111100000	664073777777600	222224245322-35-31233532	222432-5-312352	222224245322	BOV_2	683	SB0140	Drug-resistant: Pyrazinamide (R)	lineageBOV	lineage4.9	4.2.1.1.1.1.1.1.i2	bovis	NA	4.10/PGG3	2021-01-21 19:14:17	326324116	1869227	bacterium	USDA-NVSL-DBPL ()	public	USA	WGS	RANDOM	GENOMIC	PAIRED	ILLUMINA	Illumina MiSeq
SRR13500202	1101101000001110111111111111111111011100000	664073777775600	222224242322-45-41233632	222432-5-412362	222224242322	BOV_2	Orphan	SB1186	Drug-resistant: Pyrazinamide (R)	lineageBOV	lineage4.9	4.2.1.1.1.1.1.1.i2	bovis	NA	4.10/PGG3	2021-01-21 19:14:17	351997883	1869227	bacterium	USDA-NVSL-DBPL ()	public	USA	WGS	RANDOM	GENOMIC	PAIRED	ILLUMINA	Illumina MiSeq
SRR13500203	1101101000001110111111111111111111111100000	664073777777600	232224152322546321233332	322532563212332	232224152322	BOV_2	683	SB0140	Drug-resistant: Pyrazinamide (R)	lineageBOV	lineage4.9	4.2.1.1.1.1.1.1.i2	bovis	NA	4.10/PGG3	2021-01-21 19:14:17	378757898	1869227	bacterium	USDA-NVSL-DBPL ()	public	USA	WGS	RANDOM	GENOMIC	PAIRED	ILLUMINA	Illumina MiSeq
SRR13500204	1101101000001110111111111111111111111100000	664073777777600	222224252322-56-21233332	222532-6-212332	222224252322	BOV_2	683	SB0140	Drug-resistant: Pyrazinamide (R)	lineageBOV	lineage4.9	4.2.1.1.1.1.1.1.i2	bovis	NA	4.10/PGG3	2021-01-21 19:14:17	341147036	1869227	bacterium	USDA-NVSL-DBPL ()	public	USA	WGS	RANDOM	GENOMIC	PAIRED	ILLUMINA	Illumina MiSeq
SRR13500205	1101100000001110111111111111111111111100000	660073777777600	242224263322556341233332	422632563412332	242224263322	BOV	Orphan	SB1924	Drug-resistant: Pyrazinamide (R)	lineageBOV	lineage4.9	4.2.1.1.1.1.1.1.i2	bovis	NA	4.10/PGG3	2021-01-21 19:14:17	259597315	1869227	bacterium	USDA-NVSL-DBPL ()	public	USA	WGS	RANDOM	GENOMIC	PAIRED	ILLUMINA	Illumina MiSeq
SRR13500206	1101101000001110111111111111101000111100000	664073777643600	232224246322467341133532	322432473411352	232224246322	BOV_2	Orphan	SB1809	Drug-resistant: Pyrazinamide (R)	lineageBOV	lineage4.9	4.2.1.1.1.1.1.1.i2	bovis	NA	4.10/PGG3	2021-01-21 19:14:17	224102466	1869227	bacterium	USDA-NVSL-DBPL ()	public	USA	WGS	RANDOM	GENOMIC	PAIRED	ILLUMINA	Illumina MiSeq
SRR13500207	1101101000001110111111111111011111111100000	664073777577600	242224152322544231233432	422532542312342	242224152322	BOV_2	1863	SB0978	Drug-resistant: Pyrazinamide (R)	lineageBOV	lineage4.9	4.2.1.1.1.1.1.1.i2	bovis	NA	4.10/PGG3	2021-01-21 19:14:17	224718308	1869227	bacterium	USDA-NVSL-DBPL ()	public	USA	WGS	RANDOM	GENOMIC	PAIRED	ILLUMINA	Illumina MiSeq
SRR13500208	1101101000001110111111111111111111111100000	664073777777600	222224245322-36-31233532	222432-6-312352	222224245322	BOV_2	683	SB0140	Drug-resistant: Pyrazinamide (R)	lineageBOV	lineage4.9	4.2.1.1.1.1.1.1.i2	bovis	NA	4.10/PGG3	2021-01-21 19:14:17	287611184	1869227	bacterium	USDA-NVSL-DBPL ()	public	USA	WGS	RANDOM	GENOMIC	PAIRED	ILLUMINA	Illumina MiSeq
SRR13500209	1101101000001110111111111111111111111100000	664073777777600	222224264322-64-31233332	222632-4-312332	222224264322	BOV_2	683	SB0140	Drug-resistant: Pyrazinamide (R)	lineageBOV	lineage4.9	4.2.1.1.1.1.1.1.i2	bovis	NA	4.10/PGG3	2021-01-21 19:14:17	269063686	1869227	bacterium	USDA-NVSL-DBPL ()	public	USA	WGS	RANDOM	GENOMIC	PAIRED	ILLUMINA	Illumina MiSeq
SRR13500210	1101101000001110111111111111111111111100000	664073777777600	242224263322-45-31233532	422632-5-312352	242224263322	BOV_2	683	SB0140	Drug-resistant: Pyrazinamide (R)	lineageBOV	lineage4.9	4.2.1.1.1.1.1.1.i2	bovis	NA	4.10/PGG3	2021-01-21 19:14:17	419648310	1869227	bacterium	USDA-NVSL-DBPL ()	public	USA	WGS	RANDOM	GENOMIC	PAIRED	ILLUMINA	Illumina MiSeq
SRR13500211	1101101000001110111111111111111111111100000	664073777777600	222224264322-57-31233532	222632-7-312352	222224264322	BOV_2	683	SB0140	Drug-resistant: Pyrazinamide (R)	lineageBOV	lineage4.9	4.2.1.1.1.1.1.1.i2	bovis	NA	4.10/PGG3	2021-01-21 19:14:17	280590885	1869227	bacterium	USDA-NVSL-DBPL ()	public	USA	WGS	RANDOM	GENOMIC	PAIRED	ILLUMINA	Illumina MiSeq
SRR13500212	1101101000001110111111111111111111111100000	664073777777600	232124254322446331233332	321532463312332	232124254322	BOV_2	683	SB0140	Drug-resistant: Pyrazinamide (R)	lineageBOV	lineage4.9	4.2.1.1.1.1.1.1.i2	bovis	NA	4.10/PGG3	2021-01-21 19:14:17	484530376	1869227	bacterium	USDA-NVSL-DBPL ()	public	USA	WGS	RANDOM	GENOMIC	PAIRED	ILLUMINA	Illumina MiSeq
SRR13500213	1101110101111110111111111111111111111100000	672773777777600	222314252322556231233532	223532562312352	222314252322	BOV_1	3529	SB0920	Drug-resistant: Pyrazinamide (R)	lineageBOV	lineage4.9	4.2.1.1.1.1.1.1.i2	bovis	NA	4.10/PGG3	2021-01-21 19:14:17	328557956	1869227	bacterium	USDA-NVSL-DBPL ()	public	USA	WGS	RANDOM	GENOMIC	PAIRED	ILLUMINA	Illumina MiSeq
SRR13500214	1101101000001110111111111111111111111100000	664073777777600	242224232322-35-31233332	422332-5-312332	242224232322	BOV_2	683	SB0140	Drug-resistant: Pyrazinamide (R)	lineageBOV	lineage4.9	4.2.1.1.1.1.1.1.i2	bovis	NA	4.10/PGG3	2021-01-21 19:14:17	377501292	1869227	bacterium	USDA-NVSL-DBPL ()	public	USA	WGS	RANDOM	GENOMIC	PAIRED	ILLUMINA	Illumina MiSeq
SRR13888745	1101000000000010111111111111111111111100000	640013777777600	242224236322563331233321	422332533312331	242224236322	BOV_3	479	SB0145	Drug-resistant: Pyrazinamide (R)	lineageBOV	lineage4.9	4.2.1.1.1.1.1.1.i2	bovis	NA	4.10/PGG3	2021-03-11 13:18:43	488806404	1765	Mycobacterium tuberculosis variant bovis	USDA-NVSL-DBPL ()	public	USA	WGS	RANDOM	GENOMIC	PAIRED	ILLUMINA	Illumina MiSeq
SRR13888746	1101111101011110111111111111111111101100000	676573777776600	222222223322465531233632	222232455312362	222222223322	BOV_1	Orphan	SB1758	Drug-resistant: Pyrazinamide (R)	lineageBOV	lineage4.9	4.2.1.1.1.1.1.1.i2	bovis	NA	4.10/PGG3	2021-03-11 13:19:28	404199659	1765	Mycobacterium tuberculosis variant bovis	USDA-NVSL-DBPL ()	public	USA	WGS	RANDOM	GENOMIC	PAIRED	ILLUMINA	Illumina MiSeq
SRR13888747	1101101000001110111111111111111111111100000	664073777777600	222224172322463231233432	222732432312342	222224172322	BOV_2	683	SB0140	Drug-resistant: Pyrazinamide (R)	lineageBOV	lineage4.9	4.2.1.1.1.1.1.1.i2	bovis	NA	4.10/PGG3	2021-03-11 13:18:43	302031710	1765	Mycobacterium tuberculosis variant bovis	USDA-NVSL-DBPL ()	public	USA	WGS	RANDOM	GENOMIC	PAIRED	ILLUMINA	Illumina MiSeq
SRR13888748	1101111101011110111111111110001111111100000	676573777077600	222124232222557421233532	221322574212352	222124232222	BOV_1	778	SB0327	Drug-resistant: Pyrazinamide (R)	lineageBOV	lineage4.9	4.2.1.1.1.1.1.1.i2	bovis	NA	4.10/PGG3	2021-03-11 13:18:43	451684905	1765	Mycobacterium tuberculosis variant bovis	USDA-NVSL-DBPL ()	public	USA	WGS	RANDOM	GENOMIC	PAIRED	ILLUMINA	Illumina MiSeq
SRR13888749	0100000000000000111111111110100001111100000	200003777207600	257324254622267212413421	573562272124141	257324254622	BOV_4-CAPRAE	646	SB0416	Sensitive: NA	lineageBOV	lineage4.9	4.2.1.1.1.1.1.1.i2	caprae	NA	4.10/PGG3	2021-03-11 13:21:22	438654616	115862	Mycobacterium tuberculosis variant caprae	USDA-NVSL-DBPL ()	public	USA	WGS	RANDOM	GENOMIC	PAIRED	ILLUMINA	Illumina MiSeq
SRR13888750	0100000000000000111111111110111111111100000	200003777377600	223324235322237233623621	233332272336261	223324235322	BOV_4-CAPRAE	647	SB0418	Drug-resistant: Rifampicin (R)	lineageBOV	lineage4.9	4.2.1.1.1.1.1.1.i2	caprae,canetti	NA	4.10/PGG3	2021-03-11 13:21:22	448118837	115862	Mycobacterium tuberculosis variant caprae	USDA-NVSL-DBPL ()	public	USA	WGS	RANDOM	GENOMIC	PAIRED	ILLUMINA	Illumina MiSeq
SRR13888751	0100000000000000111111111110100001111100000	200003777207600	253624254622266232613321	536562262326131	253624254622	BOV_4-CAPRAE	646	SB0416	Sensitive: NA	lineageBOV	lineage4.9	4.2.1.1.1.1.1.1.i2	caprae	NA	4.10/PGG3	2021-03-11 13:19:29	501381415	115862	Mycobacterium tuberculosis variant caprae	USDA-NVSL-DBPL ()	public	USA	WGS	RANDOM	GENOMIC	PAIRED	ILLUMINA	Illumina MiSeq
SRR13888752	0100000000000000111111111110100001111100000	200003777207600	243324255422255212213421	433542252122141	243324255422	BOV_4-CAPRAE	646	SB0416	Sensitive: NA	lineageBOV	lineage4.9	4.2.1.1.1.1.1.1.i2	caprae	NA	4.10/PGG3	2021-03-11 13:21:22	327287740	115862	Mycobacterium tuberculosis variant caprae	USDA-NVSL-DBPL ()	public	USA	WGS	RANDOM	GENOMIC	PAIRED	ILLUMINA	Illumina MiSeq
SRR13888753	0100000000000000111111111110100001111100000	200003777207600	243524253622256422513421	435562264225141	243524253622	BOV_4-CAPRAE	646	SB0416	Sensitive: NA	lineageBOV	lineage4.9	4.2.1.1.1.1.1.1.i2	caprae	NA	4.10/PGG3	2021-03-11 13:19:29	406737609	115862	Mycobacterium tuberculosis variant caprae	USDA-NVSL-DBPL ()	public	USA	WGS	RANDOM	GENOMIC	PAIRED	ILLUMINA	Illumina MiSeq
SRR13888754	0100000000000000111111111110100001111100000	200003777207600	23B324254522256322513521	3B3552263225151	23B324254522	BOV_4-CAPRAE	646	SB0416	Sensitive: NA	lineageBOV	lineage4.9	4.2.1.1.1.1.1.1.i2	caprae	NA	4.10/PGG3	2021-03-11 13:19:29	254971506	115862	Mycobacterium tuberculosis variant caprae	USDA-NVSL-DBPL ()	public	USA	WGS	RANDOM	GENOMIC	PAIRED	ILLUMINA	Illumina MiSeq
SRR13888755	0100000000000000111111111110100001111100000	200003777207600	243524254522455222513621	435552452225161	243524254522	BOV_4-CAPRAE	646	SB0416	Sensitive: NA	lineageBOV	lineage4.9	4.2.1.1.1.1.1.1.i2	caprae	NA	4.10/PGG3	2021-03-11 13:21:22	406480387	115862	Mycobacterium tuberculosis variant caprae	USDA-NVSL-DBPL ()	public	USA	WGS	RANDOM	GENOMIC	PAIRED	ILLUMINA	Illumina MiSeq
SRR13888756	0100000000000000110111111110100001111100000	200003377207600	233324234622417422513321	333362474225131	233324234622	BOV_4-CAPRAE	644	SB0415	Sensitive: NA	lineageBOV	lineage4.9	4.2.1.1.1.1.1.1.i2	caprae	NA	4.10/PGG3	2021-03-11 13:19:29	249777432	115862	Mycobacterium tuberculosis variant caprae	USDA-NVSL-DBPL ()	public	USA	WGS	RANDOM	GENOMIC	PAIRED	ILLUMINA	Illumina MiSeq
SRR13888757	0100000000000000110111111110100001111100000	200003377207600	223524245322416222213321	235432462222131	223524245322	BOV_4-CAPRAE	644	SB0415	Sensitive: NA	lineageBOV	lineage4.9	4.2.1.1.1.1.1.1.i2	caprae	NA	4.10/PGG3	2021-03-11 13:21:22	476637457	115862	Mycobacterium tuberculosis variant caprae	USDA-NVSL-DBPL ()	public	USA	WGS	RANDOM	GENOMIC	PAIRED	ILLUMINA	Illumina MiSeq
SRR13888758	0100000000000000110111111110100001111100000	200003377207600	247524236722215212513521	475372252125151	247524236722	BOV_4-CAPRAE	644	SB0415	Sensitive: NA	lineageBOV	lineage4.9	4.2.1.1.1.1.1.1.i2	caprae	NA	4.10/PGG3	2021-03-11 13:21:22	408739569	115862	Mycobacterium tuberculosis variant caprae	USDA-NVSL-DBPL ()	public	USA	WGS	RANDOM	GENOMIC	PAIRED	ILLUMINA	Illumina MiSeq
SRR13888759	0100000000000000110111111110100001111100000	200003377207600	223624264622316222513621	236662362225161	223624264622	BOV_4-CAPRAE	644	SB0415	Sensitive: NA	lineageBOV	lineage4.9	4.2.1.1.1.1.1.1.i2	caprae	NA	4.10/PGG3	2021-03-11 13:21:22	560287846	115862	Mycobacterium tuberculosis variant caprae	USDA-NVSL-DBPL ()	public	USA	WGS	RANDOM	GENOMIC	PAIRED	ILLUMINA	Illumina MiSeq
SRR13888760	0100000000000000110111110000000000000000000	200003370000000	233324236422516412413521	333342564124151	233324236422	BOV_4-CAPRAE	1108	SB1908	Sensitive: NA	lineageBOV	lineage4.9	4.2.1.1.1.1.1.1.i2	caprae	NA	4.10/PGG3	2021-03-11 13:21:22	501314759	115862	Mycobacterium tuberculosis variant caprae	USDA-NVSL-DBPL ()	public	USA	WGS	RANDOM	GENOMIC	PAIRED	ILLUMINA	Illumina MiSeq
SRR13888761	0100000000000000110111111110100001111100000	200003377207600	233524236622317212613621	335362372126161	233524236622	BOV_4-CAPRAE	644	SB0415	Sensitive: NA	lineageBOV	lineage4.9	4.2.1.1.1.1.1.1.i2	caprae	NA	4.10/PGG3	2021-03-11 13:19:29	531830366	115862	Mycobacterium tuberculosis variant caprae	USDA-NVSL-DBPL ()	public	USA	WGS	RANDOM	GENOMIC	PAIRED	ILLUMINA	Illumina MiSeq
SRR13888762	0100000000000000111110011110100001111100000	200003717207600	233324235522236232513621	333352262325161	233324235522	BOV_4-CAPRAE	645	SB0157	Sensitive: NA	lineageBOV	lineage4.9	4.2.1.1.1.1.1.1.i2	caprae	NA	4.10/PGG3	2021-03-11 13:19:29	458433749	115862	Mycobacterium tuberculosis variant caprae	USDA-NVSL-DBPL ()	public	USA	WGS	RANDOM	GENOMIC	PAIRED	ILLUMINA	Illumina MiSeq
SRR13888763	0100000000000000111110011110100001111100000	200003717207600	243624235422436232513621	436342462325161	243624235422	BOV_4-CAPRAE	645	SB0157	Sensitive: NA	lineageBOV	lineage4.9	4.2.1.1.1.1.1.1.i2	caprae	NA	4.10/PGG3	2021-03-11 13:19:29	425543017	115862	Mycobacterium tuberculosis variant caprae	USDA-NVSL-DBPL ()	public	USA	WGS	RANDOM	GENOMIC	PAIRED	ILLUMINA	Illumina MiSeq
SRR13888764	0100000000000000111110011110100001111100000	200003717207600	233424275222236232513621	334722262325161	233424275222	BOV_4-CAPRAE	645	SB0157	Sensitive: NA	lineageBOV	lineage4.9	4.2.1.1.1.1.1.1.i2	caprae	NA	4.10/PGG3	2021-03-11 13:19:29	679953773	115862	Mycobacterium tuberculosis variant caprae	USDA-NVSL-DBPL ()	public	USA	WGS	RANDOM	GENOMIC	PAIRED	ILLUMINA	Illumina MiSeq
SRR13888765	0100000000000000111111111110100001111100000	200003777207600	243424255322235212613321	434532252126131	243424255322	BOV_4-CAPRAE	646	SB0416	Sensitive: NA	lineageBOV	lineage4.9	4.2.1.1.1.1.1.1.i2	caprae	NA	4.10/PGG3	2021-03-11 13:19:29	304580380	115862	Mycobacterium tuberculosis variant caprae	USDA-NVSL-DBPL ()	public	USA	WGS	RANDOM	GENOMIC	PAIRED	ILLUMINA	Illumina MiSeq
SRR13888766	0100000000000000111110011110100001111100000	200003717207600	243324255222336232513621	433522362325161	243324255222	BOV_4-CAPRAE	645	SB0157	Sensitive: NA	lineageBOV	lineage4.9	4.2.1.1.1.1.1.1.i2	caprae	NA	4.10/PGG3	2021-03-11 13:19:29	594242527	115862	Mycobacterium tuberculosis variant caprae	USDA-NVSL-DBPL ()	public	USA	WGS	RANDOM	GENOMIC	PAIRED	ILLUMINA	Illumina MiSeq
SRR13888767	0100000000000000110111111110100001111100000	200003377207600	234324274322515222513621	343732552225161	234324274322	BOV_4-CAPRAE	644	SB0415	Sensitive: NA	lineageBOV	lineage4.9	4.2.1.1.1.1.1.1.i2	caprae	NA	4.10/PGG3	2021-03-11 13:19:29	506718812	115862	Mycobacterium tuberculosis variant caprae	USDA-NVSL-DBPL ()	public	USA	WGS	RANDOM	GENOMIC	PAIRED	ILLUMINA	Illumina MiSeq
SRR13888768	0100000000000000111110011110100001111100000	200003717207600	223524235222335212513621	235322352125161	223524235222	BOV_4-CAPRAE	645	SB0157	Sensitive: NA	lineageBOV	lineage4.9	4.2.1.1.1.1.1.1.i2	caprae	NA	4.10/PGG3	2021-03-11 13:19:29	409733043	115862	Mycobacterium tuberculosis variant caprae	USDA-NVSL-DBPL ()	public	USA	WGS	RANDOM	GENOMIC	PAIRED	ILLUMINA	Illumina MiSeq
SRR13888769	0100000000000000110111111110100001111100000	200003377207600	227324235322215222513421	273332252225141	227324235322	BOV_4-CAPRAE	644	SB0415	Sensitive: NA	lineageBOV	lineage4.9	4.2.1.1.1.1.1.1.i2	caprae	NA	4.10/PGG3	2021-03-11 13:19:29	363381330	115862	Mycobacterium tuberculosis variant caprae	USDA-NVSL-DBPL ()	public	USA	WGS	RANDOM	GENOMIC	PAIRED	ILLUMINA	Illumina MiSeq
SRR13888770	0100000000000000111110010000000000000000000	200003710000000	223624255522236232413421	236552262324141	223624255522	BOV_4-CAPRAE	3716	SB1081	Sensitive: NA	lineageBOV	lineage4.9	4.2.1.1.1.1.1.1.i2	caprae	NA	4.10/PGG3	2021-03-11 13:19:29	479454849	115862	Mycobacterium tuberculosis variant caprae	USDA-NVSL-DBPL ()	public	USA	WGS	RANDOM	GENOMIC	PAIRED	ILLUMINA	Illumina MiSeq
SRR13888771	0100000000000000111110010000000000000000000	200003710000000	233524234322236222413421	335332262224141	233524234322	BOV_4-CAPRAE	3716	SB1081	Sensitive: NA	lineageBOV	lineage4.9	4.2.1.1.1.1.1.1.i2	caprae	NA	4.10/PGG3	2021-03-11 13:19:29	501561120	115862	Mycobacterium tuberculosis variant caprae	USDA-NVSL-DBPL ()	public	USA	WGS	RANDOM	GENOMIC	PAIRED	ILLUMINA	Illumina MiSeq
SRR13888772	0100000000000000110111111110100001111100000	200003377207600	226624233322416222413621	266332462224161	226624233322	BOV_4-CAPRAE	644	SB0415	Sensitive: NA	lineageBOV	lineage4.9	4.2.1.1.1.1.1.1.i2	caprae	NA	4.10/PGG3	2021-03-11 13:19:29	455217269	115862	Mycobacterium tuberculosis variant caprae	USDA-NVSL-DBPL ()	public	USA	WGS	RANDOM	GENOMIC	PAIRED	ILLUMINA	Illumina MiSeq
SRR13888773	0100000000000000111110010000000000000000000	200003710000000	243324234422234222413521	433342242224151	243324234422	BOV_4-CAPRAE	3716	SB1081	Sensitive: NA	lineageBOV	lineage4.9	4.2.1.1.1.1.1.1.i2	caprae	NA	4.10/PGG3	2021-03-11 13:19:29	397498763	115862	Mycobacterium tuberculosis variant caprae	USDA-NVSL-DBPL ()	public	USA	WGS	RANDOM	GENOMIC	PAIRED	ILLUMINA	Illumina MiSeq
SRR13888774	0100000000000000111111111110111111111100000	200003777377600	225514275322435112323321	255732451123231	225514275322	BOV_4-CAPRAE	647	SB0418	Sensitive: NA	lineageBOV	lineage4.9	4.2.1.1.1.1.1.1.i2	caprae	NA	4.10/PGG3	2021-03-11 13:19:29	508226864	115862	Mycobacterium tuberculosis variant caprae	USDA-NVSL-DBPL ()	public	USA	WGS	RANDOM	GENOMIC	PAIRED	ILLUMINA	Illumina MiSeq
SRR13888775	0100000000000000111110011110100001111100000	200003717207600	223324245222535212613421	233422552126141	223324245222	BOV_4-CAPRAE	645	SB0157	Sensitive: NA	lineageBOV	lineage4.9	4.2.1.1.1.1.1.1.i2	caprae	NA	4.10/PGG3	2021-03-11 13:19:29	412885897	115862	Mycobacterium tuberculosis variant caprae	USDA-NVSL-DBPL ()	public	USA	WGS	RANDOM	GENOMIC	PAIRED	ILLUMINA	Illumina MiSeq
SRR13888776	0100000000000000111111111110111100011100000	200003777361600	223424244422236232523421	234442262325241	223424244422	BOV_4-CAPRAE	Orphan	SB1902	Sensitive: NA	lineageBOV	lineage4.9	4.2.1.1.1.1.1.1.i2	caprae	NA	4.10/PGG3	2021-03-11 13:19:29	370098113	115862	Mycobacterium tuberculosis variant caprae	USDA-NVSL-DBPL ()	public	USA	WGS	RANDOM	GENOMIC	PAIRED	ILLUMINA	Illumina MiSeq
SRR13888777	0100000000000000111110011110100001111100000	200003717207600	233324253222236222413421	333522262224141	233324253222	BOV_4-CAPRAE	645	SB0157	Sensitive: NA	lineageBOV	lineage4.9	4.2.1.1.1.1.1.1.i2	caprae	NA	4.10/PGG3	2021-03-11 13:19:29	358846830	115862	Mycobacterium tuberculosis variant caprae	USDA-NVSL-DBPL ()	public	USA	WGS	RANDOM	GENOMIC	PAIRED	ILLUMINA	Illumina MiSeq
SRR13888778	0100000000000000111111111110111111111100000	200003777377600	223424265522336423423321	234652364234231	223424265522	BOV_4-CAPRAE	647	SB0418	Sensitive: NA	lineageBOV	lineage4.9	4.2.1.1.1.1.1.1.i2	caprae	NA	4.10/PGG3	2021-03-11 13:19:29	510084752	115862	Mycobacterium tuberculosis variant caprae	USDA-NVSL-DBPL ()	public	USA	WGS	RANDOM	GENOMIC	PAIRED	ILLUMINA	Illumina MiSeq
SRR13888779	0100000000000000111110011110100001111100000	200003717207600	243324266222436212513521	433622462125151	243324266222	BOV_4-CAPRAE	645	SB0157	Sensitive: NA	lineageBOV	lineage4.9	4.2.1.1.1.1.1.1.i2	caprae	NA	4.10/PGG3	2021-03-11 13:21:22	568211449	115862	Mycobacterium tuberculosis variant caprae	USDA-NVSL-DBPL ()	public	USA	WGS	RANDOM	GENOMIC	PAIRED	ILLUMINA	Illumina MiSeq
SRR13888780	0100000000000000110111111110100001111100000	200003377207600	23A524232522415222413521	3A5352452224151	23A524232522	BOV_4-CAPRAE	644	SB0415	Sensitive: NA	lineageBOV	lineage4.9	4.2.1.1.1.1.1.1.i2	caprae	NA	4.10/PGG3	2021-03-11 13:21:22	434416245	115862	Mycobacterium tuberculosis variant caprae	USDA-NVSL-DBPL ()	public	USA	WGS	RANDOM	GENOMIC	PAIRED	ILLUMINA	Illumina MiSeq
SRR13888781	0100000000000000111111111110111111111100000	200003777377600	223424234522-34212223421	234352-42122241	223424234522	BOV_4-CAPRAE	647	SB0418	Sensitive: NA	lineageBOV	lineage4.9	4.2.1.1.1.1.1.1.i2	caprae	NA	4.10/PGG3	2021-03-11 13:19:29	442179696	115862	Mycobacterium tuberculosis variant caprae	USDA-NVSL-DBPL ()	public	USA	WGS	RANDOM	GENOMIC	PAIRED	ILLUMINA	Illumina MiSeq
SRR13888782	0100000000000000110111111110100001111100000	200003377207600	22A424244422215222413521	2A4442252224151	22A424244422	BOV_4-CAPRAE	644	SB0415	Sensitive: NA	lineageBOV	lineage4.9	4.2.1.1.1.1.1.1.i2	caprae	NA	4.10/PGG3	2021-03-11 13:19:29	469441833	115862	Mycobacterium tuberculosis variant caprae	USDA-NVSL-DBPL ()	public	USA	WGS	RANDOM	GENOMIC	PAIRED	ILLUMINA	Illumina MiSeq
SRR13888783	0100000000000000111111111110111111111100000	200003777377600	225324252322435432423321	253532454324231	225324252322	BOV_4-CAPRAE	647	SB0418	Sensitive: NA	lineageBOV	lineage4.9	4.2.1.1.1.1.1.1.i2	caprae	NA	4.10/PGG3	2021-03-11 13:21:22	520135427	115862	Mycobacterium tuberculosis variant caprae	USDA-NVSL-DBPL ()	public	USA	WGS	RANDOM	GENOMIC	PAIRED	ILLUMINA	Illumina MiSeq
SRR13888784	0100000000000000111111111110111111111100000	200003777377600	223414263622434112423521	234662441124251	223414263622	BOV_4-CAPRAE	647	SB0418	Sensitive: NA	lineageBOV	lineage4.9	4.2.1.1.1.1.1.1.i2	caprae	NA	4.10/PGG3	2021-03-11 13:19:28	414435733	115862	Mycobacterium tuberculosis variant caprae	USDA-NVSL-DBPL ()	public	USA	WGS	RANDOM	GENOMIC	PAIRED	ILLUMINA	Illumina MiSeq
SRR13888785	0100000000000000110111110000000000000000000	200003370000000	239324252422-15222313421	393542-52223141	239324252422	BOV_4-CAPRAE	1108	SB1908	Sensitive: NA	lineageBOV	lineage4.9	4.2.1.1.1.1.1.1.i2	caprae	NA	4.10/PGG3	2021-03-11 13:21:22	349489182	115862	Mycobacterium tuberculosis variant caprae	USDA-NVSL-DBPL ()	public	USA	WGS	RANDOM	GENOMIC	PAIRED	ILLUMINA	Illumina MiSeq
SRR13888786	0100000000000000110111111110100001111100000	200003377207600	22A324245422316222413521	2A3442362224151	22A324245422	BOV_4-CAPRAE	644	SB0415	Sensitive: NA	lineageBOV	lineage4.9	4.2.1.1.1.1.1.1.i2	caprae	NA	4.10/PGG3	2021-03-11 13:19:28	359631706	115862	Mycobacterium tuberculosis variant caprae	USDA-NVSL-DBPL ()	public	USA	WGS	RANDOM	GENOMIC	PAIRED	ILLUMINA	Illumina MiSeq
SRR13888787	0100000000000000111110011110100001111100000	200003717207600	243524254222236222413321	435522262224131	243524254222	BOV_4-CAPRAE	645	SB0157	Sensitive: NA	lineageBOV	lineage4.9	4.2.1.1.1.1.1.1.i2	caprae	NA	4.10/PGG3	2021-03-11 13:42:38	376895352	115862	Mycobacterium tuberculosis variant caprae	USDA-NVSL-DBPL ()	public	USA	WGS	RANDOM	GENOMIC	PAIRED	ILLUMINA	Illumina MiSeq
SRR13888788	0100000000000000111110011110100001111100000	200003717207600	243624254222236212613621	436522262126161	243624254222	BOV_4-CAPRAE	645	SB0157	Sensitive: NA	lineageBOV	lineage4.9	4.2.1.1.1.1.1.1.i2	caprae	NA	4.10/PGG3	2021-03-11 13:42:38	502822103	115862	Mycobacterium tuberculosis variant caprae	USDA-NVSL-DBPL ()	public	USA	WGS	RANDOM	GENOMIC	PAIRED	ILLUMINA	Illumina MiSeq
SRR13888789	0100000000000000111111111110111111111100000	200003777377600	244324244412336222223321	443442362222231	244324244412	BOV_4-CAPRAE	647	SB0418	Sensitive: NA	lineageBOV	lineage4.9	4.2.1.1.1.1.1.1.i2	caprae	NA	4.10/PGG3	2021-03-11 13:19:28	492279425	115862	Mycobacterium tuberculosis variant caprae	USDA-NVSL-DBPL ()	public	USA	WGS	RANDOM	GENOMIC	PAIRED	ILLUMINA	Illumina MiSeq
SRR13888790	0100000000000000111111111110100001111100000	200003777207600	24A624252422356222213321	4A6542362222131	24A624252422	BOV_4-CAPRAE	646	SB0416	Sensitive: NA	lineageBOV	lineage4.9	4.2.1.1.1.1.1.1.i2	caprae	NA	4.10/PGG3	2021-03-11 13:19:28	477414723	115862	Mycobacterium tuberculosis variant caprae	USDA-NVSL-DBPL ()	public	USA	WGS	RANDOM	GENOMIC	PAIRED	ILLUMINA	Illumina MiSeq
SRR13888791	0100000000000000111110011110100001111100000	200003717207600	243624253222236212413321	436522262124131	243624253222	BOV_4-CAPRAE	645	SB0157	Sensitive: NA	lineageBOV	lineage4.9	4.2.1.1.1.1.1.1.i2	caprae	NA	4.10/PGG3	2021-03-11 13:19:28	428400553	115862	Mycobacterium tuberculosis variant caprae	USDA-NVSL-DBPL ()	public	USA	WGS	RANDOM	GENOMIC	PAIRED	ILLUMINA	Illumina MiSeq
SRR13888792	0100000000000000111111111110100001111100000	200003777207600	243224265622315222413621	432662352224161	243224265622	BOV_4-CAPRAE	646	SB0416	Sensitive: NA	lineageBOV	lineage4.9	4.2.1.1.1.1.1.1.i2	caprae	NA	4.10/PGG3	2021-03-11 13:18:43	407260309	115862	Mycobacterium tuberculosis variant caprae	USDA-NVSL-DBPL ()	public	USA	WGS	RANDOM	GENOMIC	PAIRED	ILLUMINA	Illumina MiSeq
SRR13888793	0100000000000000110111111110100001111100000	200003377207600	223424254522516332413421	234552563324141	223424254522	BOV_4-CAPRAE	644	SB0415	Sensitive: NA	lineageBOV	lineage4.9	4.2.1.1.1.1.1.1.i2	caprae	NA	4.10/PGG3	2021-03-11 13:42:38	369580091	115862	Mycobacterium tuberculosis variant caprae	USDA-NVSL-DBPL ()	public	USA	WGS	RANDOM	GENOMIC	PAIRED	ILLUMINA	Illumina MiSeq
SRR13888794	0100000000000000111110011110100001111100000	200003717207600	223524233222237222613521	235322272226151	223524233222	BOV_4-CAPRAE	645	SB0157	Sensitive: NA	lineageBOV	lineage4.9	4.2.1.1.1.1.1.1.i2	caprae	NA	4.10/PGG3	2021-03-11 13:21:22	452717295	115862	Mycobacterium tuberculosis variant caprae	USDA-NVSL-DBPL ()	public	USA	WGS	RANDOM	GENOMIC	PAIRED	ILLUMINA	Illumina MiSeq
SRR13888795	0100000000000000110001111110111111111100000	200003077377600	223524275722233223623521	235772232236251	223524275722	BOV_4-CAPRAE	3718	SB1199	Sensitive: NA	lineageBOV	lineage4.9	4.2.1.1.1.1.1.1.i2	caprae	NA	4.10/PGG3	2021-03-11 13:21:22	483046300	115862	Mycobacterium tuberculosis variant caprae	USDA-NVSL-DBPL ()	public	USA	WGS	RANDOM	GENOMIC	PAIRED	ILLUMINA	Illumina MiSeq
SRR13888796	0100000000000000111110011110100001111100000	200003717207600	243424233422234222413421	434342242224141	243424233422	BOV_4-CAPRAE	645	SB0157	Sensitive: NA	lineageBOV	lineage4.9	4.2.1.1.1.1.1.1.i2	caprae	NA	4.10/PGG3	2021-03-11 13:18:43	287428500	115862	Mycobacterium tuberculosis variant caprae	USDA-NVSL-DBPL ()	public	USA	WGS	RANDOM	GENOMIC	PAIRED	ILLUMINA	Illumina MiSeq
SRR13888797	0100000000000000110001111110111111111100000	200003077377600	246424234522236333523521	464352263335251	246424234522	BOV_4-CAPRAE	3718	SB1199	Sensitive: NA	lineageBOV	lineage4.9	4.2.1.1.1.1.1.1.i2	caprae	NA	4.10/PGG3	2021-03-11 13:42:38	467219400	115862	Mycobacterium tuberculosis variant caprae	USDA-NVSL-DBPL ()	public	USA	WGS	RANDOM	GENOMIC	PAIRED	ILLUMINA	Illumina MiSeq
SRR13888798	0100000000000000111111111110100001111100000	200003777207600	245524253522435322213321	455552453222131	245524253522	BOV_4-CAPRAE	646	SB0416	Sensitive: NA	lineageBOV	lineage4.9	4.2.1.1.1.1.1.1.i2	caprae	NA	4.10/PGG3	2021-03-11 13:21:22	313494683	115862	Mycobacterium tuberculosis variant caprae	USDA-NVSL-DBPL ()	public	USA	WGS	RANDOM	GENOMIC	PAIRED	ILLUMINA	Illumina MiSeq
SRR13888799	0100000000000000110111111110100001111100000	200003377207600	224424243422316422213321	244442364222131	224424243422	BOV_4-CAPRAE	644	SB0415	Sensitive: NA	lineageBOV	lineage4.9	4.2.1.1.1.1.1.1.i2	caprae	NA	4.10/PGG3	2021-03-11 13:42:38	256039138	115862	Mycobacterium tuberculosis variant caprae	USDA-NVSL-DBPL ()	public	USA	WGS	RANDOM	GENOMIC	PAIRED	ILLUMINA	Illumina MiSeq
