# Supplementary material for: SITVITBovis—a publicly available database and mapping tool to get an improved overview of animal and human cases caused by Mycobacterium bovis
Source: Oxford University Press journal article supplement (doi:10.1093/database/baab081), 2021-12-11

# Supplementary File 2

AFRICA (n=965)

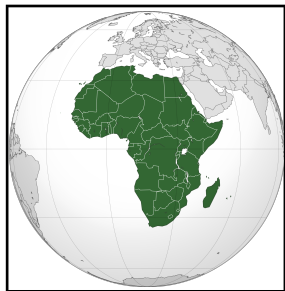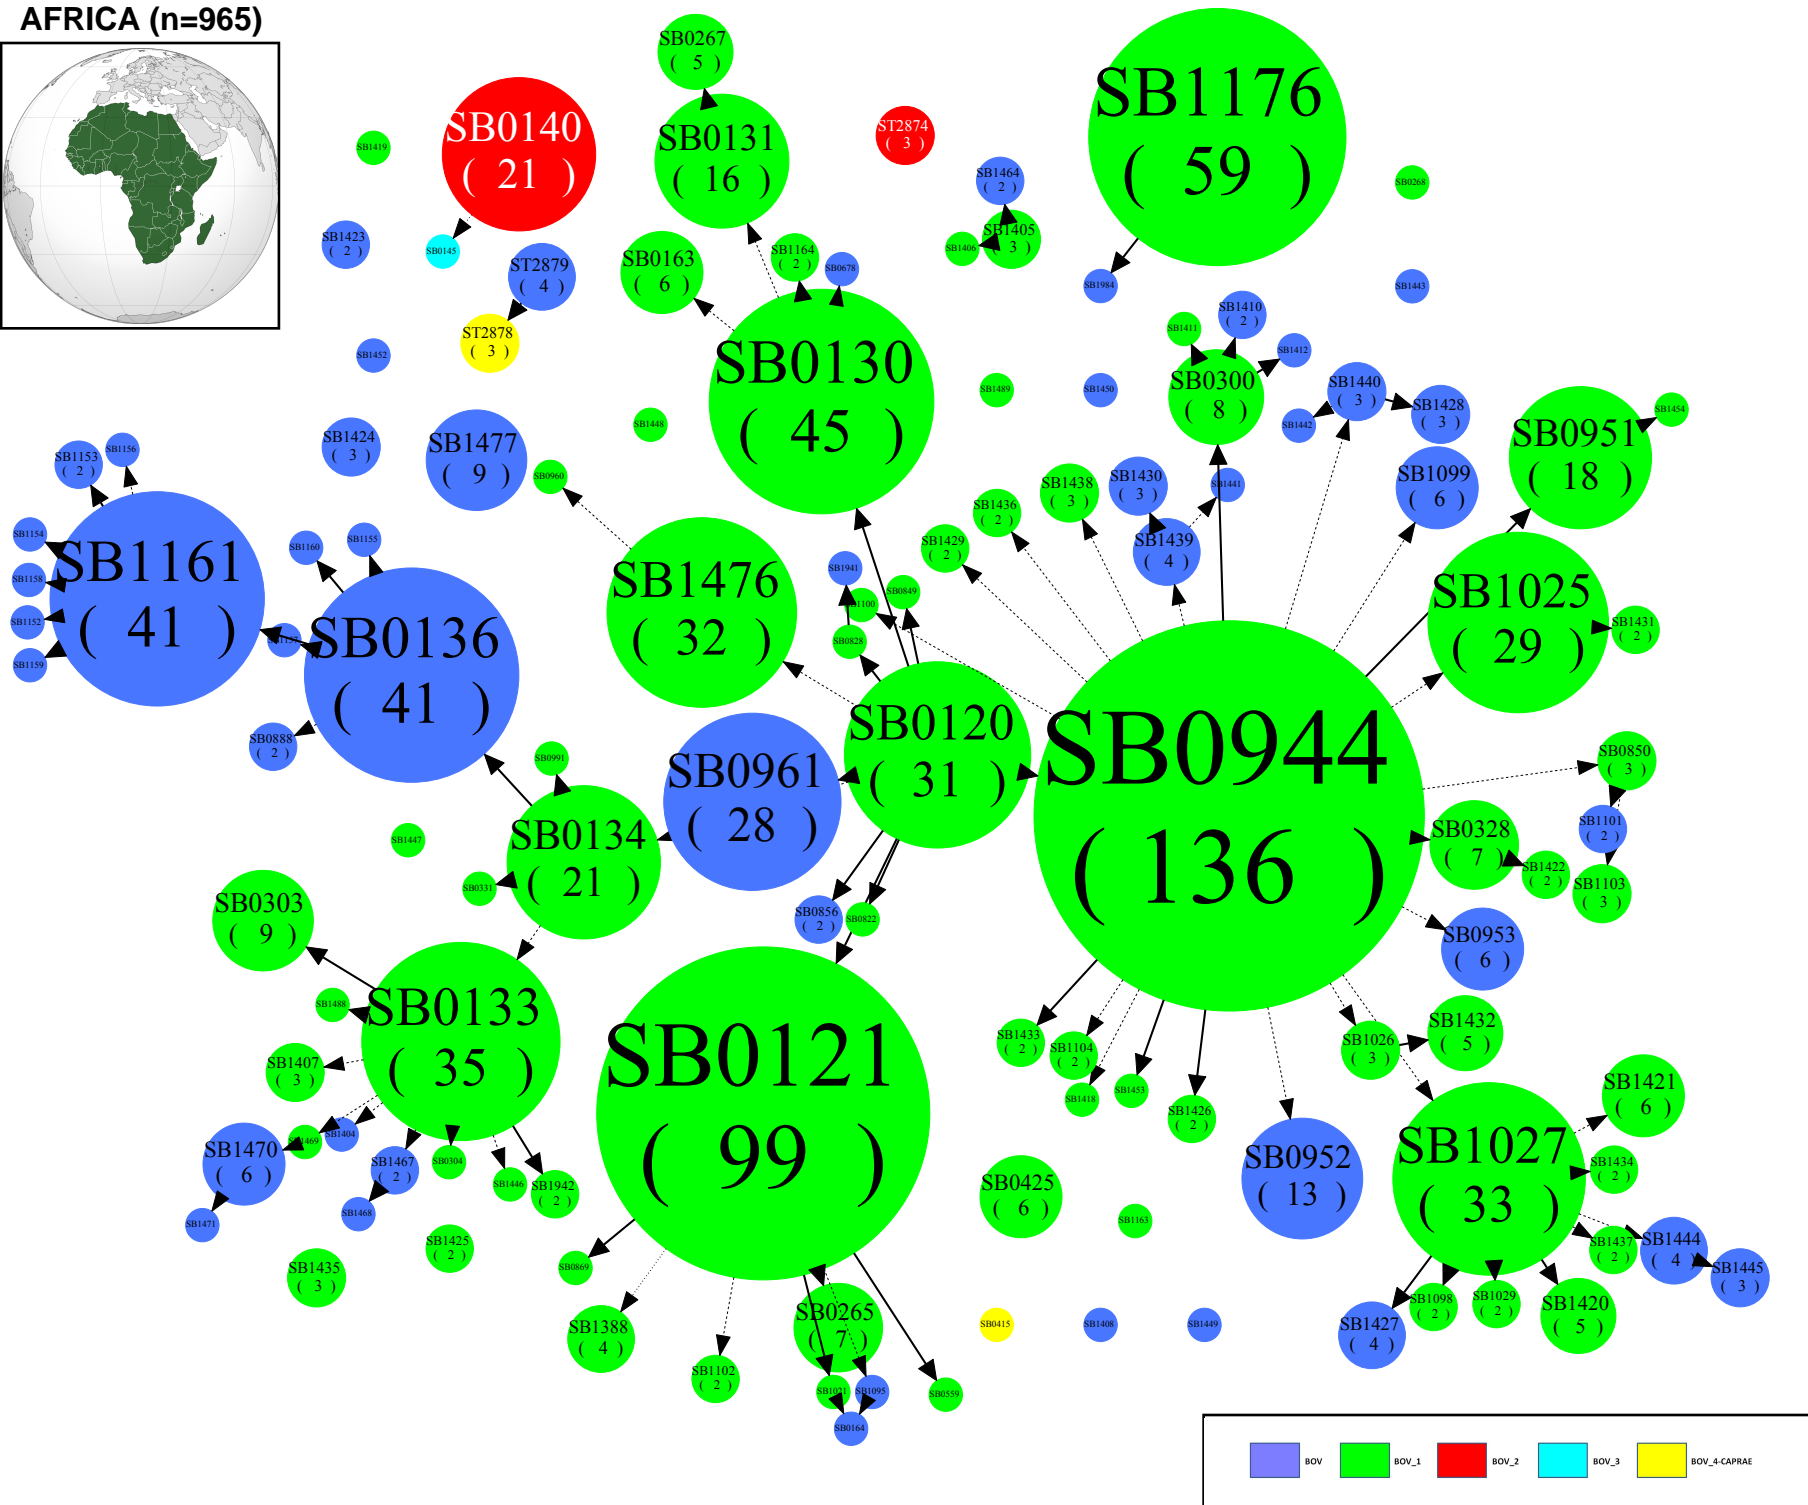



AMERICAS (n=1662)

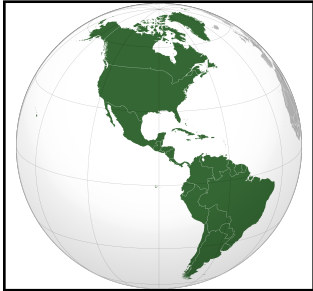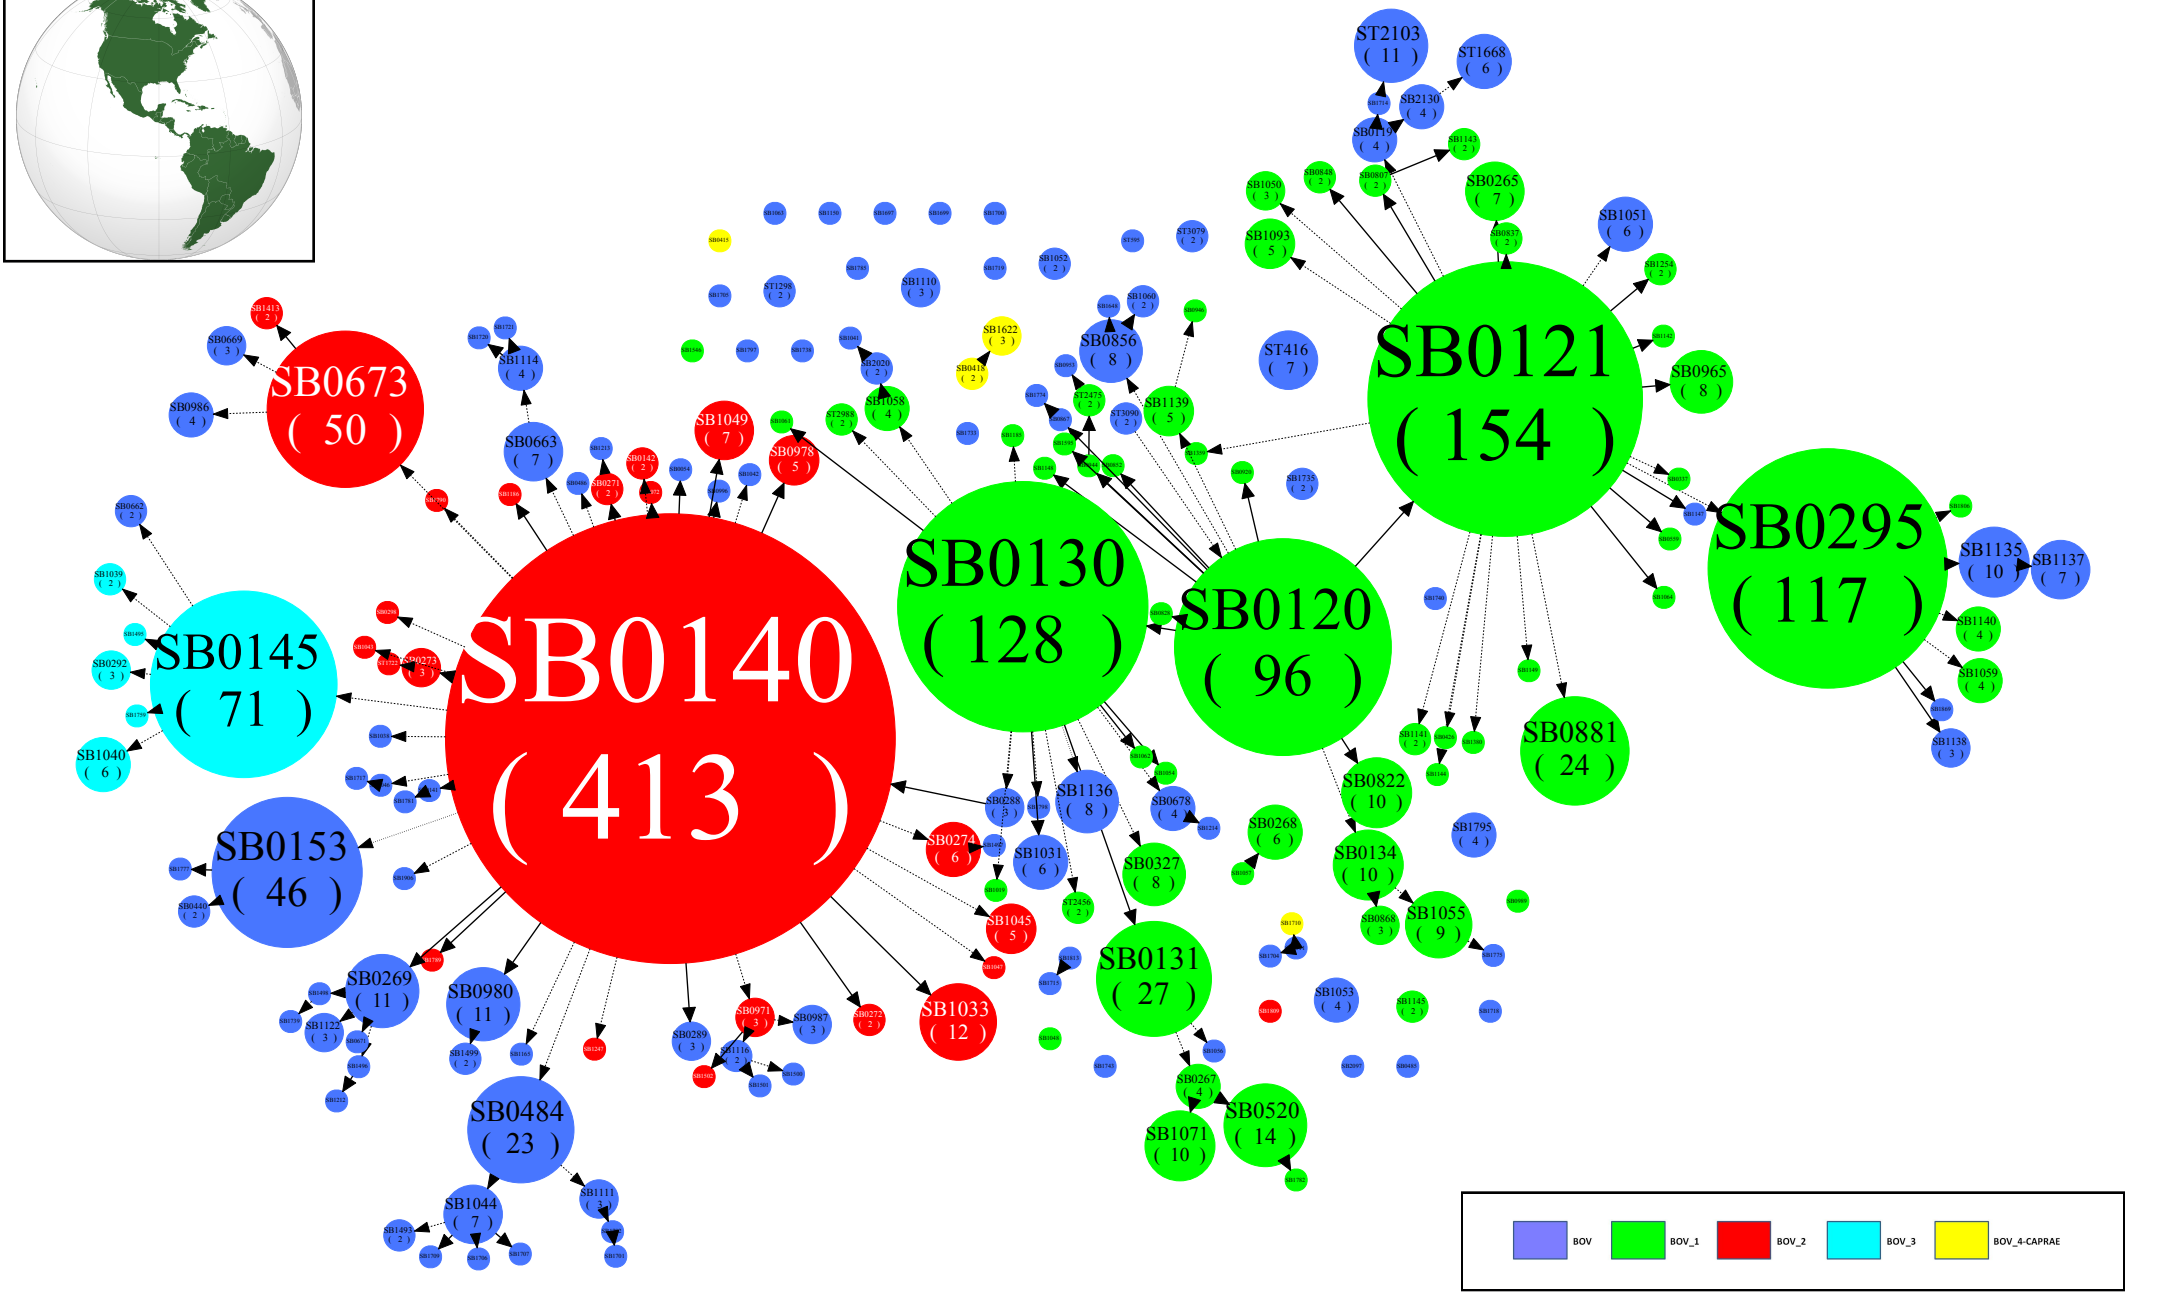



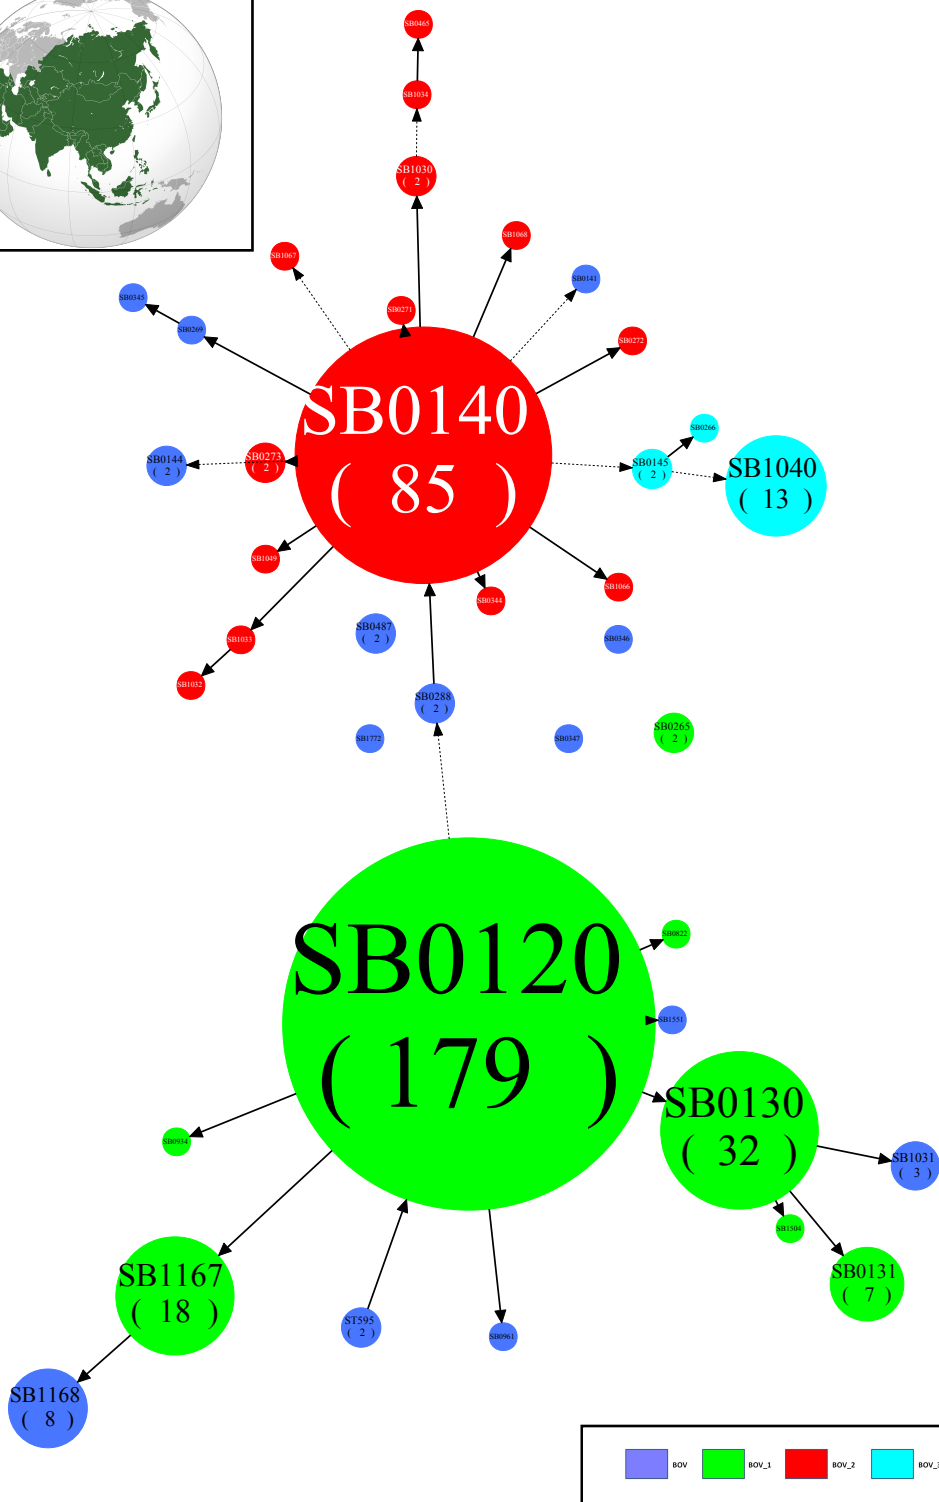



## A grayscale globe centered on the Pacific Ocean. The landmasses of North America, South America, Europe, Africa, Asia, and Australia are visible in light gray. Australia and New Zealand are highlighted in a solid dark green color. The globe includes a grid of latitude and longitude lines.

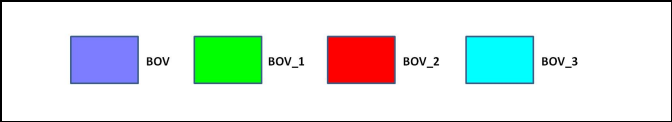



## A globe centered on the Atlantic Ocean, with Europe highlighted in green. The map shows the continents of North America, South America, Europe, and Africa, with latitude and longitude lines.

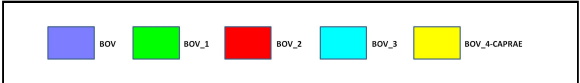

Supplement: baab081_supp.zip [file baab081_supp.zip]
